# Supplementary material for: Synthesis ofN-β-aminoacrylate substituted indolesviatBuOK catalyzed addition of indoles to ketenimines
Source: Royal Society of Chemistry journal article supplement (doi:10.1039/d3qo00635b), 2023-01-01

## Supporting Information

### **Synthesis of *N*- $\beta$ -Aminoacrylate Substituted Indoles via *t*BuOK Catalyzed Addition of Indoles to Ketenimines**

Yan-Qiu Deng,<sup>a</sup> Man-Zhen Gu,<sup>a</sup> Guo-Shu Chen,<sup>a\*</sup> Xin-Yu Li,<sup>a</sup> Ying He,<sup>a</sup> Yi-Lin Zheng,<sup>a</sup> Qi-Mei  
Yang,<sup>a</sup> and Yun-Lin Liu<sup>a\*</sup>

School of Chemistry and Chemical Engineering, Guangzhou University, Guangzhou, 510006 (China)

Email: [ylliu@gzhu.edu.cn](mailto:ylliu@gzhu.edu.cn)

|                                                                                                   |     |
|---------------------------------------------------------------------------------------------------|-----|
| 1) General Information                                                                            | S2  |
| 2) General Procedure and Spectral Data of Products <b>3</b>                                       | S3  |
| 3) General Procedure and Spectral Data of Product <b>5</b>                                        | S14 |
| 4) X-Ray Crystallographic Data for <b>5a</b>                                                      | S15 |
| 5) DFT Calculation Results                                                                        | S16 |
| 6) Copies of <sup>1</sup> H NMR and <sup>13</sup> C NMR Spectra of Products <b>3</b> and <b>5</b> | S18 |

## 1) General Information

Reactions were monitored by thin layer chromatography using UV light to visualize the course of reaction. Purification of reaction products was carried out by flash chromatography on silica gel. Chemical yields refer to pure isolated substances.  $^1\text{H}$  and  $^{13}\text{C}$  NMR spectra were obtained using a Bruker DPX-400 spectrometer. Chemical shifts are reported in ppm from  $\text{CDCl}_3$  with the solvent resonance as the internal standard. The following abbreviations were used to designate chemical shift multiplicities: s = singlet, d = doublet, t = triplet, q = quartet, h = heptet, m = multiplet, br = broad.

Anhydrous solvents such as  $\text{CH}_2\text{Cl}_2$ ,  $\text{CH}_3\text{CN}$ , THF, toluene, and EtOAc, and the catalysts such as  $\text{Et}_3\text{N}$ , DABCO, DBU,  $t\text{BuOLi}$ ,  $t\text{BuONa}$ , and  $t\text{BuOK}$  were purchased from Energy Chemical. Unless otherwise stated, all purchased reagents were used without further purification. The; All reactions involving air- or moisture-sensitive compounds were carried out under nitrogen atmosphere in dried Schlenk tube. The ketenimines **1**<sup>[1]</sup> was prepared using the literature procedures.

## References

[1] (a) P. Lu and Y. Wang, *Chem. Soc. Rev.*, **2012**, *41*, 5687; (b) G.-S. Chen, S.-J. Chen, J. Luo, X.-Y. Mao, A. S.-C. Chan, R. W.-Y. Sun and Y.-L. Liu, *Angew. Chem. Int. Ed.*, **2020**, *59*, 614; (c) J. Luo, G.-S. Chen, S.-J. Chen, Z.-D. Li, Y.-L. Zhao and Y.-L. Liu, *Adv. Synth. Catal.* **2020**, *362*, 3635.

## 2) General Procedure and Spectral Data of Products 3.

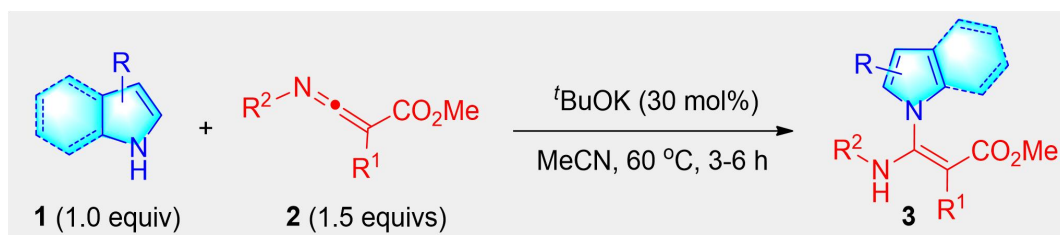

To a 10.0 mL Schlenk tube were successively added  $t\text{BuOK}$  (30 mol%), indole or pyrrole **1** (0.10 mmol), anhydrous MeCN (1.0 mL) and ketenimines **2** (0.15 mmol). The reaction mixture was stirred vigorously at 60 °C for 3-6 h under  $\text{N}_2$  atmosphere till full consumption of **1**. The reaction mixture was then concentrated by rotary vaporation, and the residue was subjected to column chromatography using petroleum ether/ethyl acetate (from 20:1-3:1) as eluent to afford the desired products **3**.

The reaction was run at 60 °C for 3 h, affording product **3a** as a yellow solid (91% yield, 41.5 mg).  $^1\text{H}$  NMR (400 MHz,  $\text{CDCl}_3$ ):  $\delta$  2.70 (t,  $J = 6.8$  Hz, 2H), 2.92-3.01 (m, 1H), 3.12-3.19 (m, 1H), 3.71 (s, 3H), 3.79 (s, 3H), 3.86 (s, 3H), 6.20 (dd,  $J = 3.2, 0.8$  Hz, 1H), 6.30 (d,  $J = 3.2$  Hz, 1H), 6.48 (d,  $J = 2.0$  Hz, 1H), 6.59 (dd,  $J = 8.0, 2.0$  Hz, 1H), 6.76 (d,  $J = 8.4$  Hz, 1H), 6.80-6.82 (m, 2H), 6.91-6.95 (m, 3H), 7.08-7.12 (m, 1H), 7.18-7.23 (m, 1H), 7.35 (dd,  $J = 8.4, 0.8$  Hz, 1H), 7.46 (d,  $J = 8.0$  Hz, 1H), 9.23 (t,  $J = 6.0$  Hz, 1H);  $^{13}\text{C}$  NMR (100 MHz,  $\text{CDCl}_3$ ):  $\delta$  170.8, 154.1, 148.8, 147.6, 135.8, 135.4, 130.9, 130.5, 128.3, 127.8, 127.3, 125.8, 122.8, 120.82, 120.76, 112.0, 111.2, 111.1, 103.7, 97.0, 55.9, 55.6, 51.4, 45.5, 37.1; HRMS (ESI): Exact mass calcd for  $\text{C}_{28}\text{H}_{28}\text{N}_2\text{O}_4\text{Na}$   $[\text{M}+\text{Na}]^+$ : 479.1941, Found: 479.1952.

The reaction was run at 60 °C for 3 h, affording product **3b** as a yellow solid (91% yield, 42.8 mg).  $^1\text{H}$  NMR (400 MHz,  $\text{CDCl}_3$ ):  $\delta$  2.06 (s, 3H), 2.62-2.66 (m, 2H), 2.83-2.90 (m, 2H), 3.71 (s, 3H), 3.77 (s, 3H), 3.84 (s, 3H), 6.07 (s, 1H), 6.39 (s, 1H), 6.55 (d,  $J = 8.0$  Hz, 1H), 6.74 (d,  $J = 8.0$  Hz, 1H), 6.85-6.93 (m, 5H), 7.05 (t,  $J = 7.2$  Hz, 1H), 7.12 (t,  $J = 7.6$  Hz, 1H), 7.21 (d,  $J = 8.4$  Hz, 1H), 7.37 (d,  $J = 7.6$  Hz, 1H), 9.41 (t,  $J = 6.0$  Hz, 1H);  $^{13}\text{C}$  NMR (100 MHz,  $\text{CDCl}_3$ ):  $\delta$  170.8, 152.3, 148.8, 147.6, 136.7, 135.6, 134.9, 130.8, 130.4, 128.1, 127.1, 125.9, 121.6, 120.5, 120.4, 119.6, 111.7, 111.1, 110.4, 102.2, 98.4, 55.8, 55.6,

51.4, 44.8, 36.7, 12.6; HRMS (ESI): Exact mass calcd for C<sub>29</sub>H<sub>30</sub>N<sub>2</sub>O<sub>4</sub>Na [M+Na]<sup>+</sup>: 493.2098, Found: 493.2108.

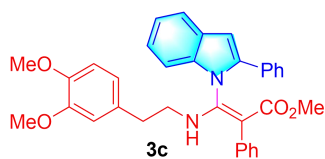

The reaction was run at 60 °C for 6 h, affording product **3c** as a yellow solid (48% yield, 25.5 mg). <sup>1</sup>H NMR (400 MHz, CDCl<sub>3</sub>) δ 2.84 (t, *J* = 6.8 Hz, 2H), 3.26-3.38 (m, 2H), 3.61 (s, 3H), 3.84 (s, 3H), 3.87 (s, 3H), 6.18 (dd, *J* = 8.0, 1.2 Hz, 2H), 6.42 (d, *J* = 0.4 Hz, 1H), 6.68-6.72 (m, 4H), 6.80 (d, *J* = 8.4 Hz, 1H), 6.86 (tt, *J* = 7.2, 1.6 Hz, 1H), 7.01-7.04 (m, 2H), 7.13-7.17 (m, 1H), 7.20-7.25 (m, 3H), 7.27-7.29 (m, 1H), 7.34 (dd, *J* = 8.0, 0.8 Hz, 1H), 7.50 (d, *J* = 7.6 Hz, 1H), 9.57 (t, *J* = 5.6 Hz, 1H); <sup>13</sup>C NMR (100 MHz, CDCl<sub>3</sub>) δ 170.8, 152.8, 148.9, 147.7, 139.7, 137.9, 134.4, 131.7, 131.0, 130.3, 128.2, 128.1, 127.6, 127.2, 126.7, 125.6, 123.0, 121.1, 120.8, 120.6, 112.2, 111.3, 111.1, 103.7, 97.5, 55.9, 55.8, 51.2, 45.4, 36.0; HRMS (ESI): Exact mass calcd for C<sub>34</sub>H<sub>32</sub>N<sub>2</sub>O<sub>4</sub>Na [M+Na]<sup>+</sup>: 555.2254, Found: 555.2246.

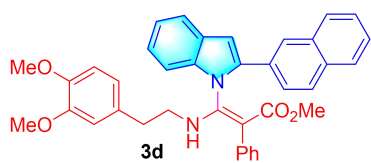

The reaction was run at 60 °C for 6 h, affording product **3d** as a yellow solid (37% yield, 21.5 mg). <sup>1</sup>H NMR (400 MHz, CDCl<sub>3</sub>) δ 2.89 (t, *J* = 6.8 Hz, 2H), 3.38-3.43 (m, 2H), 3.56 (s, 3H), 3.83 (s, 3H), 3.88 (s, 3H), 6.12 (d, *J* = 7.6 Hz, 2H), 6.54 (s, 1H), 6.65 (t, *J* = 8.0 Hz, 2H), 6.71 (d, *J* = 7.6 Hz, 2H), 6.80 (d, *J* = 8.0 Hz, 1H), 6.87 (t, *J* = 7.2 Hz, 1H), 7.16-7.19 (m, 2H), 7.25-7.28 (m, 1H), 7.37 (d, *J* = 8.4 Hz, 1H), 7.48-7.50 (m, 2H), 7.53-7.55 (m, 2H), 7.67-7.71 (m, 2H), 7.82-7.85 (m, 1H), 9.62 (t, *J* = 5.2 Hz, 1H); <sup>13</sup>C NMR (100 MHz, CDCl<sub>3</sub>) δ 170.7, 152.9, 148.9, 147.7, 139.7, 138.1, 134.3, 133.0, 132.6, 130.9, 130.3, 129.2, 128.3, 127.6, 126.7, 126.3, 126.20, 126.17, 125.7, 125.2, 123.1, 121.2, 120.7, 120.6, 112.1, 111.2, 111.1, 104.2, 97.5, 55.8, 55.7, 51.2, 45.4, 36.0; HRMS (ESI): Exact mass calcd for C<sub>38</sub>H<sub>34</sub>N<sub>2</sub>O<sub>4</sub>Na [M+Na]<sup>+</sup>: 605.2411, Found: 605.2396.

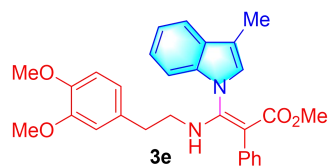

The reaction was run at 60 °C for 3 h, affording product **3e** as a yellow solid (88% yield, 41.4 mg). <sup>1</sup>H NMR (400 MHz, CDCl<sub>3</sub>) δ 2.00 (d, *J* = 1.2 Hz, 3H), 2.69 (td, *J* = 6.8, 2.4 Hz, 2H), 2.95-3.03 (m, 1H), 3.11-3.19 (m, 1H), 3.71 (s, 3H), 3.78 (s, 3H), 3.86 (s, 3H), 6.05 (d, *J* = 1.2 Hz, 1H), 6.48 (d, *J* = 2.0 Hz, 1H), 6.59 (dd, *J* = 8.4, 2.0 Hz, 1H), 6.75 (d, *J* = 8.0 Hz, 1H), 6.79-6.81 (m, 2H), 6.91-6.94 (m, 3H), 7.07-7.11 (m, 1H), 7.15-7.19 (m, 1H), 7.28 (dt, *J* = 8.0, 0.8 Hz, 1H), 7.37-7.39 (m, 1H), 9.19 (t, *J* = 5.6 Hz, 1H); <sup>13</sup>C NMR (100 MHz, CDCl<sub>3</sub>) δ 170.8, 154.4, 148.8, 147.6, 136.0, 135.6, 131.0, 130.5, 128.9, 127.2, 125.6,



125.1, 122.7, 120.8, 120.2, 118.7, 113.0, 111.9, 111.2, 111.0, 96.6, 55.9, 55.6, 51.3, 45.6, 37.1, 9.2; HRMS (ESI): Exact mass calcd for C<sub>29</sub>H<sub>30</sub>N<sub>2</sub>NaO<sub>4</sub> [M+Na]<sup>+</sup>: 493.2098, Found: 493.2108.

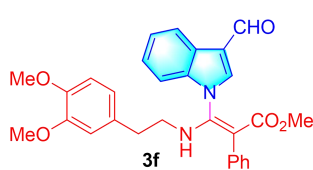

The reaction was run at 60 °C for 4 h, affording product **3f** as a yellow solid (69% yield, 33.4 mg). <sup>1</sup>H NMR (400 MHz, CDCl<sub>3</sub>) δ 2.66-2.77 (m, 2H), 2.85-2.91 (m, 1H), 3.22-3.27 (m, 1H), 3.74 (s, 3H), 3.79 (s, 3H), 3.88 (s, 3H), 6.45 (s, 1H), 6.52 (d, *J* = 2.4 Hz, 1H), 6.57 (dd, *J* = 8.0, 2.0 Hz, 1H), 6.74-6.80 (m, 3H), 6.91-6.95 (m, 3H), 7.28-7.40 (m, 3H), 8.14 (d, *J* = 7.6 Hz, 1H), 9.21-9.23 (m, 1H), 9.55 (s, 1H); <sup>13</sup>C NMR (100 MHz, CDCl<sub>3</sub>) δ 184.8, 170.5, 152.4, 148.9, 147.8, 138.7, 137.1, 134.3, 130.7, 130.2, 127.8, 126.5, 125.1, 124.2, 123.6, 122.2, 121.1, 119.5, 112.1, 111.3, 111.2, 97.9, 56.0, 55.6, 51.6, 45.7, 37.3; HRMS (ESI): Exact mass calcd for C<sub>29</sub>H<sub>28</sub>N<sub>2</sub>O<sub>5</sub>Na [M+Na]<sup>+</sup>: 507.1890, Found: 507.1834.

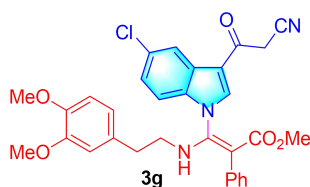

The reaction was run at 60 °C for 6 h, affording product **3g** as a yellow solid (69% yield, 38.4 mg). <sup>1</sup>H NMR (400 MHz, CDCl<sub>3</sub>) δ 2.67-2.80 (m, 2H), 2.84-2.94 (m, 1H), 3.17 (d, *J* = 18.8 Hz, 1H), 3.35-3.42 (m, 1H), 3.55 (d, *J* = 18.8 Hz, 1H), 3.71 (s, 3H), 3.75 (s, 3H), 3.92 (s, 3H), 6.04 (s, 1H), 6.44 (d, *J* = 2.0 Hz, 1H), 6.67-6.70 (m, 3H), 6.87 (d, *J* = 8.0 Hz, 1H), 6.94-7.02 (m, 3H), 7.32-7.33 (m, 2H), 8.16-8.17 (m, 1H), 9.18 (dd, *J* = 9.2, 3.6 Hz, 1H); <sup>13</sup>C NMR (100 MHz, CDCl<sub>3</sub>) δ 181.0, 170.3, 151.9, 149.1, 147.9, 136.0, 135.0, 134.3, 131.2, 130.14, 130.11, 128.4, 127.9, 126.8, 126.1, 125.8, 122.2, 121.9, 114.8, 113.9, 112.6, 112.4, 111.4, 98.0, 56.2, 55.7, 51.8, 45.9, 37.9, 28.8; HRMS (ESI): Exact mass calcd for C<sub>31</sub>H<sub>28</sub>ClN<sub>3</sub>O<sub>5</sub>Na [M+Na]<sup>+</sup>: 580.1615, Found: 580.1613.

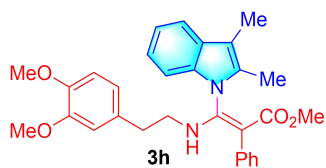

The reaction was run at 60 °C for 4 h, affording product **3h** as a yellow solid (78% yield, 37.8 mg). <sup>1</sup>H NMR (400 MHz, CDCl<sub>3</sub>) δ 2.00 (s, 3H), 2.03 (s, 3H), 2.59-2.67 (m, 2H), 2.76-2.84 (m, 1H), 2.86-2.95 (m, 1H), 3.70 (s, 3H), 3.76 (s, 3H), 3.84 (s, 3H), 6.36 (d, *J* = 2.0 Hz, 1H), 6.54 (dd, *J* = 8.0, 2.0 Hz, 1H), 6.73 (d, *J* = 8.4 Hz, 1H), 6.84-6.86 (m, 2H), 6.89-6.92 (m, 3H), 7.05 (td, *J* = 8.0, 1.6 Hz, 1H), 7.11 (td, *J* = 7.2, 1.6 Hz, 1H), 7.16-7.19 (m, 1H), 7.33 (d, *J* = 7.6 Hz, 1H), 9.41 (t, *J* = 5.6 Hz, 1H); <sup>13</sup>C NMR (100 MHz, CDCl<sub>3</sub>) δ 170.9, 152.8, 148.8, 147.5, 135.8, 135.1, 131.3, 130.9, 130.5, 128.9, 127.0, 125.7, 121.6, 120.5, 119.8, 117.8, 111.7, 111.1, 110.2, 109.1, 98.3, 55.8, 55.6, 51.3, 44.8, 36.8, 10.2, 8.6; HRMS (ESI): Exact mass calcd for C<sub>30</sub>H<sub>32</sub>N<sub>2</sub>NaO<sub>4</sub> [M+Na]<sup>+</sup>: 507.2254, Found: 507.2244.

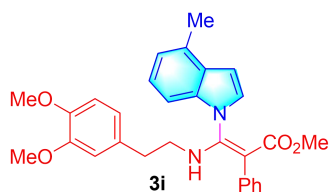

The reaction was run at 60 °C for 5 h, affording product **3i** as a yellow solid (83% yield, 39.0 mg). <sup>1</sup>H NMR (400 MHz, CDCl<sub>3</sub>): δ 2.43 (s, 3H), 2.69 (t, *J* = 6.8 Hz, 2H), 2.90-2.95 (m, 1H), 3.11-3.16 (m, 1H), 3.71 (s, 3H), 3.79 (s, 3H), 3.86 (s, 3H), 6.20 (d, *J* = 3.2 Hz, 1H), 6.29 (d, *J* = 3.6 Hz, 1H), 6.47 (s, 1H), 6.59 (d, *J* = 8.0 Hz, 1H), 6.76 (d, *J* = 8.0 Hz, 1H), 6.82-6.83 (m, 2H), 6.90 (d, *J* = 7.2 Hz, 1H), 6.95-6.96 (m, 3H), 7.11 (t, *J* = 7.6 Hz, 1H), 7.21 (d, *J* = 8.4 Hz, 1H), 9.23 (t, *J* = 5.2 Hz, 1H); <sup>13</sup>C NMR (100 MHz, CDCl<sub>3</sub>) δ 170.8, 154.2, 148.8, 147.6, 135.6, 135.5, 130.9, 130.5, 130.2, 128.1, 127.3, 127.1, 125.7, 122.9, 121.1, 120.8, 112.0, 111.1, 108.8, 102.2, 96.9, 55.9, 55.6, 51.4, 45.5, 37.1, 18.6; HRMS (ESI): Exact mass calcd for C<sub>29</sub>H<sub>30</sub>N<sub>2</sub>O<sub>4</sub>Na [M+Na]<sup>+</sup>: 493.2098, Found: 493.2111.

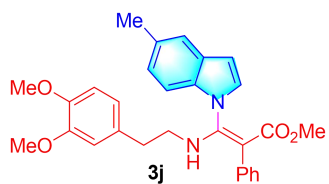

The reaction was run at 60 °C for 4 h, affording product **3j** as a yellow solid (85% yield, 40.0 mg). <sup>1</sup>H NMR (400 MHz, CDCl<sub>3</sub>) δ 2.41 (s, 3H), 2.69 (t, *J* = 6.4 Hz, 2H), 2.92-2.98 (m, 1H), 3.13-3.18 (m, 1H), 3.71 (s, 3H), 3.79 (s, 3H), 3.86 (s, 3H), 6.10 (d, *J* = 3.2 Hz, 1H), 6.22 (d, *J* = 3.2 Hz, 1H), 6.47 (s, 1H), 6.59 (d, *J* = 8.0 Hz, 1H), 6.75 (d, *J* = 8.0 Hz, 1H), 6.80-6.81 (m, 2H), 6.94-6.95 (m, 3H), 7.03 (d, *J* = 8.0 Hz, 1H), 7.25 (d, *J* = 8.0 Hz, 2H), 9.21 (t, *J* = 6.4 Hz, 1H); <sup>13</sup>C NMR (100 MHz, CDCl<sub>3</sub>) δ 170.8, 154.3, 148.7, 147.6, 135.6, 134.2, 130.9, 130.5, 130.1, 128.6, 127.9, 127.4, 125.7, 124.4, 120.8, 120.6, 112.0, 111.0, 110.9, 103.3, 96.7, 55.9, 55.6, 51.3, 45.6, 37.1, 21.3; HRMS (ESI): Exact mass calcd for C<sub>29</sub>H<sub>30</sub>N<sub>2</sub>O<sub>4</sub>Na [M+Na]<sup>+</sup>: 493.2098, Found: 493.2106.

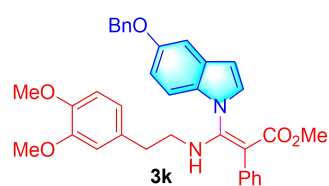

The reaction was run at 60 °C for 3 h, affording product **3k** as a yellow solid (94% yield, 52.8 mg). <sup>1</sup>H NMR (400 MHz, CDCl<sub>3</sub>) δ 2.69 (t, *J* = 6.8 Hz, 2H), 2.92-3.01 (m, 1H), 3.13-3.18 (m, 1H), 3.69 (s, 3H), 3.79 (s, 3H), 3.85 (s, 3H), 5.03 (s, 2H), 6.09 (d, *J* = 3.2 Hz, 1H), 6.24 (d, *J* = 3.6 Hz, 1H), 6.50 (s, 1H), 6.58 (d, *J* = 8.4 Hz, 1H), 6.74 (d, *J* = 8.0 Hz, 1H), 6.80-6.81 (m, 2H), 6.91-6.98 (m, 5H), 7.25 (d, *J* = 8.0 Hz, 1H), 7.32 (t, *J* = 6.8 Hz, 1H), 7.38 (t, *J* = 7.2 Hz, 2H), 7.44 (d, *J* = 7.6 Hz, 2H), 9.17 (t, *J* = 6.4 Hz, 1H); <sup>13</sup>C NMR (100 MHz, CDCl<sub>3</sub>) δ 170.7, 154.2, 154.0, 148.7, 147.6, 137.4, 135.5, 131.0, 130.9, 130.5, 128.9, 128.5, 128.4, 127.8, 127.5, 127.3, 125.7, 120.8, 113.3, 112.01, 111.96, 111.1, 103.9, 103.5, 96.8, 70.5, 55.9, 55.6, 51.3, 45.6, 37.1; HRMS (ESI): Exact mass calcd for C<sub>35</sub>H<sub>34</sub>N<sub>2</sub>O<sub>5</sub>Na [M+Na]<sup>+</sup>: 585.2360, Found: 585.2364.

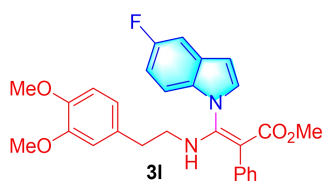

The reaction was run at 60 °C for 6 h, affording product **3l** as a yellow solid (72% yield, 34.1 mg). <sup>1</sup>H NMR (400 MHz, CDCl<sub>3</sub>) δ 2.70 (t, *J* = 6.8 Hz, 2H), 2.92-3.00 (m, 1H), 3.09-3.17 (m, 1H), 3.71 (s, 3H), 3.81 (s, 3H), 3.87 (s, 3H), 6.15 (d, *J* = 3.2 Hz, 1H), 6.33 (d, *J* = 3.2 Hz, 1H), 6.51 (d, *J* = 2.0 Hz, 1H), 6.59 (dd, *J* = 8.0, 2.0 Hz, 1H), 6.75-6.81 (m, 3H), 6.90-6.96 (m, 4H), 7.09 (dd, *J* = 9.2, 2.4 Hz, 1H), 7.24 (dd, *J* = 9.2, 4.4 Hz, 1H), 9.19 (t, *J* = 6.4 Hz, 1H); <sup>13</sup>C NMR (100 MHz, CDCl<sub>3</sub>) δ 170.7, 158.3 (d, *J* = 235 Hz), 153.7, 148.8, 147.6, 135.3, 132.2, 130.8, 130.4, 129.4, 128.7 (d, *J* = 10.1 Hz), 127.4, 125.9, 120.8, 112.0, 111.8 (d, *J* = 9.5 Hz), 111.1, 111.0 (d, *J* = 25.9 Hz), 105.8 (d, *J* = 23.5 Hz), 103.7 (d, *J* = 4.4 Hz), 97.2, 55.9, 55.6, 51.4, 45.5, 37.1; HRMS (ESI): Exact mass calcd for C<sub>28</sub>H<sub>27</sub>FN<sub>2</sub>O<sub>4</sub>Na [M+Na]<sup>+</sup>: 497.1847, Found: 497.1859.

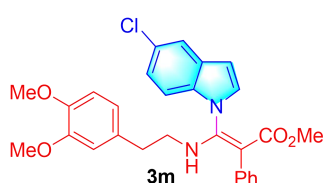

The reaction was run at 60 °C for 5 h, affording product **3m** as a yellow solid (74% yield, 36.2 mg). <sup>1</sup>H NMR (400 MHz, CDCl<sub>3</sub>) δ 2.67-2.71 (m, 2H), 2.89-2.98 (m, 1H), 3.07-3.15 (m, 1H), 3.71 (s, 3H), 3.80 (s, 3H), 3.86 (s, 3H), 6.13 (d, *J* = 3.2 Hz, 1H), 6.30 (d, *J* = 3.6 Hz, 1H), 6.48 (d, *J* = 1.2 Hz, 1H), 6.58 (dd, *J* = 8.0, 2.0 Hz, 1H), 6.75-6.79 (m, 3H), 6.95-6.96 (m, 3H), 7.14 (dd, *J* = 8.8, 2.0 Hz, 1H), 7.24 (d, *J* = 9.2 Hz, 1H), 7.42 (d, *J* = 1.6 Hz, 1H), 9.17 (t, *J* = 6.4 Hz, 1H); <sup>13</sup>C NMR (100 MHz, CDCl<sub>3</sub>) δ 170.6, 153.6, 148.9, 147.8, 135.3, 134.3, 130.9, 130.5, 129.4, 129.2, 127.6, 126.5, 126.0, 123.2, 121.0, 120.4, 112.3, 112.1, 111.2, 103.3, 97.3, 56.0, 55.7, 51.6, 45.6, 37.3; HRMS (ESI): Exact mass calcd for C<sub>28</sub>H<sub>28</sub>ClN<sub>2</sub>O<sub>4</sub> [M+H]<sup>+</sup>: 491.1732, Found: 491.1723.

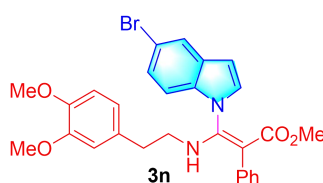

The reaction was run at 60 °C for 5 h, affording product **3n** as a yellow solid (82% yield, 43.8 mg). <sup>1</sup>H NMR (400 MHz, CDCl<sub>3</sub>) δ 2.67-2.71 (m, 2H), 2.88-2.97 (m, 1H), 3.07-3.14 (m, 1H), 3.71 (s, 3H), 3.80 (s, 3H), 3.86 (s, 3H), 6.13 (d, *J* = 3.6 Hz, 1H), 6.28 (d, *J* = 3.2 Hz, 1H), 6.48 (d, *J* = 2.0 Hz, 1H), 6.58 (dd, *J* = 8.0, 1.6 Hz, 1H), 6.75-6.79 (m, 3H), 6.94-6.96 (m, 3H), 7.20 (d, *J* = 8.8 Hz, 1H), 7.26-7.29 (m, 1H), 7.58 (d, *J* = 2.0 Hz, 1H), 9.17 (t, *J* = 6.0 Hz, 1H); <sup>13</sup>C NMR (100 MHz, CDCl<sub>3</sub>) δ 170.6, 153.4, 148.8, 147.7, 135.1, 134.4, 130.7, 130.4, 129.9, 129.0, 127.4, 126.0, 125.7, 123.3, 120.8, 114.0, 112.6, 111.9, 111.1, 103.2, 97.4, 55.9, 55.6, 51.5, 45.5, 37.1; HRMS (ESI): Exact mass calcd for C<sub>28</sub>H<sub>27</sub>BrN<sub>2</sub>O<sub>4</sub>Na [M+Na]<sup>+</sup>: 557.1046, Found: 557.1054.

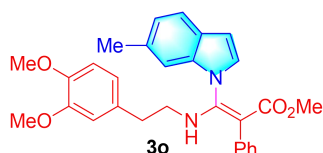

The reaction was run at 60 °C for 4 h, affording product **3o** as a yellow solid (79% yield, 37.1 mg).  $^1\text{H}$  NMR (400 MHz,  $\text{CDCl}_3$ )  $\delta$  2.45 (s, 3H), 2.70 (t,  $J$  = 6.8 Hz, 2H), 2.94-3.02 (m, 1H), 3.14-3.21 (m, 1H), 3.71 (s, 3H), 3.79 (s, 3H), 3.85 (s, 3H), 6.14 (dd,  $J$  = 3.2, 0.8 Hz, 1H), 6.24 (d,  $J$  = 3.2 Hz, 1H), 6.49 (d,  $J$  = 2.0 Hz, 1H), 6.59 (dd,  $J$  = 8.0, 2.0 Hz, 1H), 6.76 (d,  $J$  = 8.4 Hz, 1H), 6.80-6.83 (m, 2H), 6.92-6.95 (m, 4H), 7.16 (s, 1H), 7.33 (d,  $J$  = 8.0 Hz, 1H), 9.24 (t,  $J$  = 5.6 Hz, 1H);  $^{13}\text{C}$  NMR (100 MHz,  $\text{CDCl}_3$ )  $\delta$  170.8, 154.3, 148.8, 147.6, 136.2, 135.6, 132.7, 131.0, 130.5, 127.3, 127.2, 126.1, 125.7, 122.5, 120.8, 120.3, 112.1, 111.23, 111.17, 103.6, 96.9, 55.9, 55.6, 51.3, 45.6, 37.2, 21.8; HRMS (ESI): Exact mass calcd for  $\text{C}_{29}\text{H}_{30}\text{N}_2\text{O}_4\text{Na}$   $[\text{M}+\text{Na}]^+$ : 493.2098, Found: 493.2109.

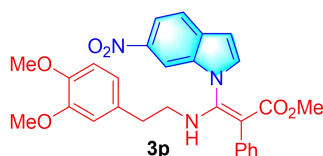

The reaction was run at 60 °C for 3 h, affording product **3p** as a yellow solid (83% yield, 41.6 mg).  $^1\text{H}$  NMR (400 MHz,  $\text{CDCl}_3$ )  $\delta$  2.69-2.79 (m, 2H), 2.90-2.99 (m, 1H), 3.17-3.25 (m, 1H), 3.73 (s, 3H), 3.80 (s, 3H), 3.87 (s, 3H), 6.32 (d,  $J$  = 3.2 Hz, 1H), 6.53-6.56 (m, 2H), 6.60 (d,  $J$  = 8.4 Hz, 1H), 6.76-6.78 (m, 3H), 6.91-6.92 (m, 3H), 7.49 (d,  $J$  = 8.4 Hz, 1H), 7.98 (dd,  $J$  = 8.8, 1.2 Hz, 1H), 8.25 (s, 1H), 9.18 (t,  $J$  = 6.0 Hz, 1H);  $^{13}\text{C}$  NMR (100 MHz,  $\text{CDCl}_3$ )  $\delta$  170.3, 152.2, 148.8, 147.7, 143.8, 134.8, 134.3, 133.3, 132.8, 130.5, 130.3, 127.5, 126.2, 120.8, 120.7, 116.3, 112.0, 111.1, 108.0, 104.3, 98.1, 55.9, 55.6, 51.6, 45.6, 37.2; HRMS (ESI): Exact mass calcd for  $\text{C}_{28}\text{H}_{27}\text{N}_3\text{O}_6\text{Na}$   $[\text{M}+\text{Na}]^+$ : 524.1792, Found: 524.1786.

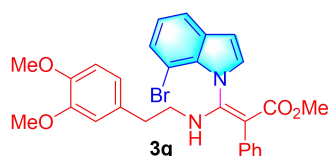

The reaction was run at 60 °C for 5 h, affording product **3q** as a yellow solid (70% yield, 37.4 mg).  $^1\text{H}$  NMR (400 MHz,  $\text{CDCl}_3$ )  $\delta$  2.68-2.77 (m, 3H), 3.14-3.19 (m, 1H), 3.68 (s, 3H), 3.82 (s, 3H), 3.85 (s, 3H), 6.28 (d,  $J$  = 3.6 Hz, 1H), 6.49 (d,  $J$  = 3.2 Hz, 1H), 6.53 (d,  $J$  = 2.0 Hz, 1H), 6.61 (dd,  $J$  = 8.0, 2.0 Hz, 1H), 6.77 (d,  $J$  = 8.4 Hz, 1H), 6.91-6.96 (m, 4H), 7.00-7.03 (m, 2H), 7.37 (t,  $J$  = 7.2 Hz, 2H), 9.35 (d,  $J$  = 6.0 Hz, 1H);  $^{13}\text{C}$  NMR (100 MHz,  $\text{CDCl}_3$ )  $\delta$  170.3, 153.5, 148.8, 147.6, 135.1, 133.2, 130.9, 130.9, 130.5, 129.6, 127.3, 127.2, 125.9, 121.7, 120.7, 120.2, 111.9, 111.1, 104.3, 104.0, 98.1, 55.9, 55.7, 51.3, 44.9, 36.4; HRMS (ESI): Exact mass calcd for  $\text{C}_{28}\text{H}_{27}\text{BrN}_2\text{O}_4\text{Na}$   $[\text{M}+\text{Na}]^+$ : 557.1046, Found: 557.1050.

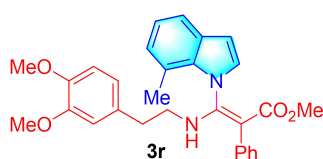

The reaction was run at 60 °C for 4 h, affording product **3r** as a yellow solid (74% yield, 34.8 mg).  $^1\text{H}$  NMR (400 MHz,  $\text{CDCl}_3$ )  $\delta$  2.58 (s, 3H), 2.62-2.72 (m, 3H), 2.95-3.00 (m, 1H), 3.70 (s, 3H), 3.81 (s, 3H), 3.85 (s, 3H), 6.25 (d,  $J$  = 3.2 Hz, 1H), 6.36 (d,  $J$  = 3.2 Hz, 1H), 6.45 (s, 1H), 6.57 (d,  $J$  = 8.0 Hz, 1H), 6.76 (d,  $J$  = 8.4 Hz, 1H), 6.92-7.02 (m, 7H),

7.31 (d,  $J = 7.6$  Hz, 1H), 9.42 (t,  $J = 3.2$  Hz, 1H);  $^{13}\text{C}$  NMR (100 MHz,  $\text{CDCl}_3$ )  $\delta$  170.5, 155.4, 148.8, 147.6, 135.3, 135.0, 130.83, 130.81, 128.9, 128.4, 127.4, 125.8, 125.2, 121.5, 120.9, 120.7, 118.8, 111.9, 111.1, 103.8, 97.7, 55.9, 55.6, 51.3, 44.7, 36.7, 17.8; HRMS (ESI): Exact mass calcd for  $\text{C}_{29}\text{H}_{30}\text{N}_2\text{O}_4\text{Na}$   $[\text{M}+\text{Na}]^+$ : 493.2098, Found: 493.2111.

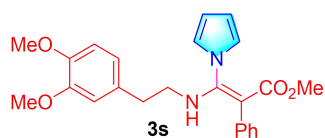

The reaction was run at 60 °C for 3 h, affording product **3s** as a yellow solid (98% yield, 39.8 mg).  $^1\text{H}$  NMR (400 MHz,  $\text{CDCl}_3$ ):  $\delta$  2.74 (t,  $J = 6.8$  Hz, 2H), 3.17 (dd,  $J = 13.2, 6.8$  Hz, 2H), 3.68 (s, 3H), 3.87 (s, 6H), 5.95 (t,  $J = 2.4$  Hz, 2H), 6.28 (t,  $J = 2.0$  Hz, 2H), 6.63-6.68 (m, 2H), 6.80 (d,  $J = 8.4$  Hz, 1H), 6.93-6.95 (m, 2H), 7.04-7.12 (m, 3H), 9.05 (t,  $J = 6.0$  Hz, 1H);  $^{13}\text{C}$  NMR (100 MHz,  $\text{CDCl}_3$ )  $\delta$  170.5, 155.6, 148.8, 147.6, 135.7, 131.0, 130.7, 127.3, 125.7, 121.4, 120.8, 112.11, 111.2, 109.4, 96.1, 55.9, 55.7, 51.2, 45.5, 37.2; HRMS (ESI): Exact mass calcd for  $\text{C}_{24}\text{H}_{26}\text{N}_2\text{O}_4\text{Na}$   $[\text{M}+\text{Na}]^+$ : 429.1785, Found: 429.1790.

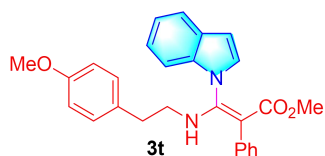

The reaction was run at 60 °C for 3 h, affording product **3t** as a yellow solid (96% yield, 40.9 mg).  $^1\text{H}$  NMR (400 MHz,  $\text{CDCl}_3$ )  $\delta$  2.72 (t,  $J = 7.2$  Hz, 2H), 2.91-3.00 (m, 1H), 3.11-3.17 (m, 1H), 3.73 (s, 3H), 3.79 (s, 3H), 6.22 (d,  $J = 3.2$  Hz, 1H), 6.37 (d,  $J = 3.6$  Hz, 1H), 6.79-6.85 (m, 4H), 6.94-6.97 (m, 5H), 7.11 (t,  $J = 8.0$  Hz, 1H), 7.21 (t,  $J = 7.2$  Hz, 1H), 7.38 (d,  $J = 8.0$  Hz, 1H), 7.47 (d,  $J = 7.6$  Hz, 1H), 9.20 (t,  $J = 6.0$  Hz, 1H);  $^{13}\text{C}$  NMR (100 MHz,  $\text{CDCl}_3$ )  $\delta$  170.7, 158.3, 154.0, 135.8, 135.5, 130.5, 130.3, 129.8, 128.3, 127.7, 127.3, 125.7, 122.8, 120.8, 120.7, 113.9, 111.2, 103.8, 97.1, 55.2, 51.3, 45.4, 36.5; HRMS (ESI): Exact mass calcd for  $\text{C}_{27}\text{H}_{26}\text{N}_2\text{O}_3\text{Na}$   $[\text{M}+\text{Na}]^+$ : 449.1836, Found: 449.1826.

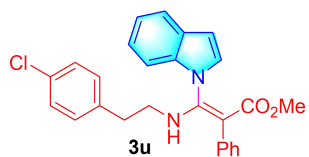

The reaction was run at 60 °C for 3 h, affording product **3u** as a yellow solid (97% yield, 41.7 mg).  $^1\text{H}$  NMR (400 MHz,  $\text{CDCl}_3$ )  $\delta$  2.73 (t,  $J = 6.8$  Hz, 2H), 2.93-3.01 (m, 1H), 3.11-3.17 (m, 1H), 3.72 (s, 3H), 6.23 (d,  $J = 3.2$  Hz, 1H), 6.36 (d,  $J = 3.6$  Hz, 1H), 6.82-6.83 (m, 2H), 6.94-6.96 (m, 5H), 7.11 (t,  $J = 7.6$  Hz, 1H), 7.19-7.23 (m, 3H), 7.35 (d,  $J = 8.0$  Hz, 1H), 7.47 (d,  $J = 8.0$  Hz, 1H), 9.18 (t,  $J = 6.0$  Hz, 1H);  $^{13}\text{C}$  NMR (100 MHz,  $\text{CDCl}_3$ )  $\delta$  170.8, 153.9, 136.8, 135.8, 135.4, 132.4, 130.5, 130.3, 128.6, 128.3, 127.6, 127.4, 125.8, 122.9, 120.8, 111.1, 104.0, 97.4, 51.4, 45.0, 36.8; HRMS (ESI): Exact mass calcd for  $\text{C}_{26}\text{H}_{23}\text{ClN}_2\text{O}_2\text{Na}$   $[\text{M}+\text{Na}]^+$ : 453.1340, Found: 453.1342.

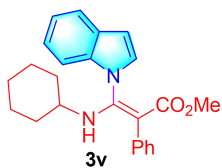

The reaction was run at 60 °C for 5 h, affording product **3v** as a yellow solid (67% yield, 25.0 mg). <sup>1</sup>H NMR (400 MHz, CDCl<sub>3</sub>): δ 1.05-1.12 (m, 2H), 1.29-1.36 (m, 2H), 1.37-1.46 (m, 2H), 1.61-1.70 (m, 3H), 1.78-1.83 (m, 1H), 2.81-2.86 (m, 1H), 3.72 (s, 3H), 6.27 (dd, *J* = 3.6, 0.8 Hz, 1H), 6.67 (d, *J* = 3.2 Hz, 1H), 6.84-6.88 (m, 2H), 6.92-6.95 (m, 3H), 7.08-7.12 (m, 1H), 7.18-7.22 (m, 1H), 7.44-7.48 (m, 2H), 9.14 (d, *J* = 9.6 Hz, 1H); <sup>13</sup>C NMR (100 MHz, CDCl<sub>3</sub>) δ 170.9, 153.5, 136.1, 135.6, 130.5, 128.3, 127.8, 127.2, 125.7, 122.8, 120.73, 120.67, 111.1, 104.0, 97.3, 52.2, 51.3, 35.0, 33.3, 25.3, 24.3, 24.1; HRMS (ESI): Exact mass calcd for C<sub>24</sub>H<sub>26</sub>N<sub>2</sub>O<sub>2</sub>Na [M+Na]<sup>+</sup>: 397.1886, Found: 397.1888.

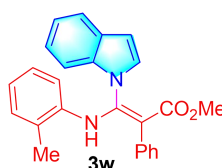

The reaction was run at 60 °C for 3 h, affording product **3w** as a yellow solid (99% yield, 37.8 mg). <sup>1</sup>H NMR (400 MHz, CDCl<sub>3</sub>) δ 2.54 (s, 3H), 3.78 (s, 3H), 5.99 (d, *J* = 8.4 Hz, 1H), 6.29 (d, *J* = 3.2 Hz, 1H), 6.61 (t, *J* = 8.0 Hz, 1H), 6.71 (d, *J* = 3.6 Hz, 1H), 6.77 (t, *J* = 7.6 Hz, 1H), 6.97-7.04 (m, 7H), 7.10 (d, *J* = 7.6 Hz, 1H), 7.23 (d, *J* = 8.4 Hz, 1H), 7.36 (d, *J* = 7.6 Hz, 1H), 10.86 (s, 1H); <sup>13</sup>C NMR (100 MHz, CDCl<sub>3</sub>) δ 170.7, 149.4, 137.4, 135.1, 135.0, 130.7, 130.5, 128.9, 128.5, 127.52, 127.48, 126.4, 126.1, 123.8, 122.6, 120.8, 120.5, 119.6, 111.6, 105.2, 99.4, 51.8, 18.4; HRMS (ESI): Exact mass calcd for C<sub>25</sub>H<sub>22</sub>N<sub>2</sub>O<sub>2</sub>Na [M+Na]<sup>+</sup>: 405.1574, Found: 405.1570.

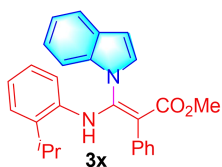

The reaction was run at 60 °C for 3 h, affording product **3x** as a yellow solid (99% yield, 40.6 mg). <sup>1</sup>H NMR (400 MHz, CDCl<sub>3</sub>) δ 1.41 (d, *J* = 6.4 Hz, 6H), 3.51-3.58 (sep, *J* = 6.8 Hz, 1H), 3.79 (s, 3H), 6.17 (d, *J* = 8.0 Hz, 1H), 6.26 (d, *J* = 3.6 Hz, 1H), 6.61 (t, *J* = 7.6 Hz, 1H), 6.71 (d, *J* = 3.2 Hz, 1H), 6.87 (t, *J* = 7.6 Hz, 1H), 6.93-7.03 (m, 7H), 7.19 (d, *J* = 7.6 Hz, 1H), 7.25 (d, *J* = 8.4 Hz, 1H), 7.33 (d, *J* = 7.6 Hz, 1H), 10.88 (s, 1H); <sup>13</sup>C NMR (100 MHz, CDCl<sub>3</sub>) δ 170.8, 150.1, 140.2, 135.8, 135.2, 135.1, 130.7, 128.4, 127.7, 127.4, 126.0, 125.9, 125.6, 124.8, 122.4, 121.2, 120.7, 120.5, 111.7, 105.1, 99.4, 51.8, 28.1; HRMS (ESI): Exact mass calcd for C<sub>27</sub>H<sub>26</sub>N<sub>2</sub>O<sub>2</sub>Na [M+Na]<sup>+</sup>: 433.1886, Found: 433.1880.

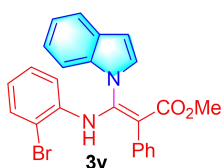

The reaction was run at 60 °C for 3 h, affording product **3y** as a yellow solid (94% yield, 41.9 mg). <sup>1</sup>H NMR (400 MHz, CDCl<sub>3</sub>) δ 3.80 (s, 3H), 6.00 (s, 1H), 6.30 (s, 1H), 6.66-6.69 (m, 3H), 7.00-7.05 (m, 6H), 7.31-7.37 (m, 3H), 7.48 (s, 1H), 10.88 (s, 1H); <sup>13</sup>C NMR (100 MHz, CDCl<sub>3</sub>) δ 170.3, 147.7, 137.3, 135.1, 134.6, 132.7, 130.7, 128.5, 127.8, 127.6, 127.5, 126.3, 124.5, 123.0,



121.0, 120.6, 120.2, 115.6, 111.7, 105.5, 101.0, 52.0; HRMS (ESI): Exact mass calcd for  $C_{24}H_{19}BrN_2O_2Na$   $[M+Na]^+$ : 469.0522, Found: 469.0526.

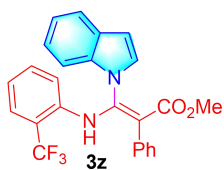

The reaction was run at 60 °C for 6 h, affording product **3z** as a yellow solid (78% yield, 34 mg).  $^1H$  NMR (400 MHz,  $CDCl_3$ )  $\delta$  3.81 (s, 3H), 6.17-6.19 (m, 1H), 6.31 (d,  $J = 3.2$  Hz, 1H), 6.74 (d,  $J = 3.2$  Hz, 1H), 6.90-6.92 (m, 2H), 6.95-7.04 (m, 7H), 7.33-7.36 (m, 2H), 7.53-7.55 (m, 1H), 11.07 (s, 1H);  $^{13}C$  NMR (100 MHz,  $CDCl_3$ )  $\delta$  170.3, 147.8, 137.2, 135.1, 134.5, 132.4, 130.6, 128.5, 127.6, 127.5, 126.4, 123.2, 122.9, 121.4, 121.2, 121.0, 120.9 ( $J = 29.5$  Hz), 120.6, 111.6, 105.8, 102.1, 52.1; HRMS (ESI): Exact mass calcd for  $C_{25}H_{19}F_3N_2O_2Na$   $[M+Na]^+$ : 459.1291, Found: 459.1276.

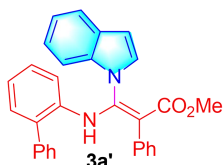

The reaction was run at 60 °C for 5 h, affording product **3a'** as a yellow solid (95% yield, 42.2 mg).  $^1H$  NMR (400 MHz,  $CDCl_3$ )  $\delta$  3.72 (s, 3H), 6.21 (d,  $J = 3.2$  Hz, 1H), 6.34 (d,  $J = 8.0$  Hz, 1H), 6.48 (d,  $J = 3.2$  Hz, 1H), 6.81 (t,  $J = 8.0$  Hz, 1H), 6.89-6.93 (m, 3H), 6.97-7.03 (m, 5H), 7.13-7.16 (m, 2H), 7.33 (d,  $J = 7.6$  Hz, 1H), 7.49 (t,  $J = 6.8$  Hz, 1H), 7.54-7.61 (m, 4H), 10.63 (s, 1H);  $^{13}C$  NMR (100 MHz,  $CDCl_3$ )  $\delta$  170.2, 148.8, 139.0, 136.1, 135.14, 135.08, 134.8, 130.61, 130.58, 129.4, 128.7, 128.5, 127.8, 127.6, 127.4, 126.0, 124.1, 122.4, 121.0, 120.8, 120.4, 112.0, 105.0, 100.1, 51.7; HRMS (ESI): Exact mass calcd for  $C_{30}H_{24}N_2O_2Na$   $[M+Na]^+$ : 467.1730, Found: 467.1720.

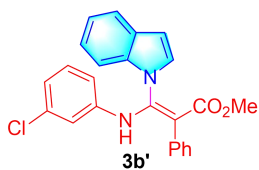

The reaction was run at 60 °C for 3 h, affording product **3b'** as a yellow solid (97% yield, 39.0 mg).  $^1H$  NMR (400 MHz,  $CDCl_3$ )  $\delta$  3.78 (s, 3H), 6.26 (dd,  $J = 8.0, 0.8$  Hz, 1H), 6.34 (d,  $J = 3.2$  Hz, 1H), 6.53 (t,  $J = 2.0$  Hz, 1H), 6.69 (d,  $J = 3.2$  Hz, 1H), 6.78-6.81 (m, 1H), 6.86 (t,  $J = 8.0$  Hz, 1H), 6.98-7.01 (m, 3H), 7.03-7.08 (m, 4H), 7.31 (d,  $J = 8.0$  Hz, 1H), 7.39-7.41 (m, 1H), 10.86 (s, 1H);  $^{13}C$  NMR (100 MHz,  $CDCl_3$ )  $\delta$  170.6, 148.3, 140.3, 135.0, 134.5, 130.6, 129.9, 128.6, 127.6, 127.2, 126.4, 123.5, 123.0, 121.1, 120.7, 120.1, 117.7, 111.7, 105.7, 100.8, 51.9; HRMS (ESI): Exact mass calcd for  $C_{24}H_{19}ClN_2O_2Na$   $[M+Na]^+$ : 425.1027, Found: 425.1023.

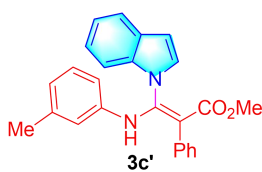

The reaction was run at 60 °C for 3 h, affording product **3c'** as a yellow solid (98% yield, 37.4 mg).  $^1H$  NMR (400 MHz,  $CDCl_3$ )  $\delta$  2.09 (s, 3H), 3.79 (s, 3H), 6.22 (d,  $J = 8.0$  Hz, 1H), 6.33 (d,  $J = 3.2$  Hz, 1H), 6.40 (s, 1H), 6.66 (d,  $J = 7.6$  Hz, 1H), 6.74 (d,  $J = 3.6$  Hz, 1H), 6.84 (t,  $J = 7.6$  Hz, 1H), 6.98-7.07 (m, 7H), 7.34 (d,  $J = 7.6$  Hz, 1H), 7.39 (d,  $J = 7.6$  Hz, 1H), 10.88 (s, 1H);

$^{13}\text{C}$  NMR (100 MHz,  $\text{CDCl}_3$ )  $\delta$  170.6, 149.0, 138.8, 138.7, 135.1, 134.9, 130.7, 128.7, 128.5, 127.4, 126.1, 124.4, 122.7, 120.9, 120.8, 120.5, 116.8, 111.9, 105.2, 99.5, 51.7, 21.2; HRMS (ESI): Exact mass calcd for  $\text{C}_{25}\text{H}_{22}\text{N}_2\text{O}_2\text{Na}$   $[\text{M}+\text{Na}]^+$ : 405.1573, Found: 405.1573.

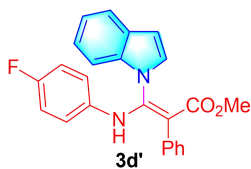

The reaction was run at 60 °C for 3 h, affording product **3d'** as a yellow solid (97% yield, 37.4 mg).  $^1\text{H}$  NMR (400 MHz,  $\text{CDCl}_3$ )  $\delta$  3.79 (s, 3H), 6.30 (d,  $J = 2.8$  Hz, 1H), 6.50-6.53 (m, 2H), 6.66-6.71 (m, 3H), 6.98-7.08 (m, 7H), 7.32 (d,  $J = 8.0$  Hz, 1H), 7.38 (d,  $J = 7.2$  Hz, 1H), 10.86 (s, 1H);  $^{13}\text{C}$  NMR (100 MHz,  $\text{CDCl}_3$ )  $\delta$  170.7, 159.2 (d,  $J = 242$  Hz), 149.2, 135.01, 134.98, 134.96, 134.7, 130.6, 128.4, 127.5, 127.4, 126.2, 122.8, 121.9 (d,  $J = 8.1$  Hz), 121.0, 120.6, 115.7 (d,  $J = 22.6$  Hz), 111.8, 105.4, 99.6, 51.8; HRMS (ESI): Exact mass calcd for  $\text{C}_{24}\text{H}_{19}\text{FN}_2\text{O}_2\text{Na}$   $[\text{M}+\text{Na}]^+$ : 409.1323, Found: 409.1319.

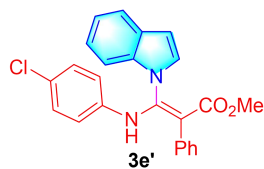

The reaction was run at 60 °C for 3 h, affording product **3e'** as a yellow solid (98% yield, 39.4 mg).  $^1\text{H}$  NMR (400 MHz,  $\text{CDCl}_3$ )  $\delta$  3.78 (s, 3H), 6.32 (d,  $J = 2.8$  Hz, 1H), 6.41 (d,  $J = 8.8$  Hz, 2H), 6.69 (d,  $J = 3.2$  Hz, 1H), 6.92-7.07 (m, 9H), 7.30 (d,  $J = 8.3$  Hz, 1H), 7.39 (d,  $J = 7.2$  Hz, 1H), 10.88 (s, 1H);  $^{13}\text{C}$  NMR (100 MHz,  $\text{CDCl}_3$ )  $\delta$  170.6, 148.5, 137.6, 134.9, 134.6, 130.6, 129.0, 128.8, 128.5, 127.5, 127.2, 126.3, 123.0, 121.1, 120.7, 111.7, 105.6, 100.3, 51.9; HRMS (ESI): Exact mass calcd for  $\text{C}_{24}\text{H}_{19}\text{ClN}_2\text{O}_2\text{Na}$   $[\text{M}+\text{Na}]^+$ : 425.1027, Found: 425.1025.

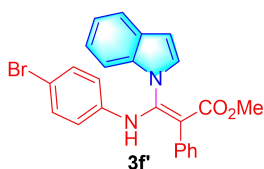

The reaction was run at 60 °C for 3 h, affording product **3f'** as a yellow solid (96% yield, 42.8 mg).  $^1\text{H}$  NMR (400 MHz,  $\text{CDCl}_3$ )  $\delta$  3.78 (s, 3H), 6.32 (dd,  $J = 3.6, 0.8$  Hz, 1H), 6.34-6.36 (m, 2H), 6.69 (d,  $J = 3.6$  Hz, 1H), 6.97-7.00 (m, 2H), 7.01-7.06 (m, 5H), 7.08-7.10 (m, 2H), 7.30 (dd,  $J = 8.0, 1.2$  Hz, 1H), 7.38-7.41 (m, 1H), 10.87 (s, 1H);  $^{13}\text{C}$  NMR (100 MHz,  $\text{CDCl}_3$ )  $\delta$  170.6, 148.4, 138.2, 134.9, 134.5, 132.0, 130.6, 128.5, 127.6, 127.2, 126.3, 123.0, 121.4, 121.1, 120.7, 116.4, 111.7, 105.6, 100.5, 51.9; HRMS (ESI): Exact mass calcd for  $\text{C}_{24}\text{H}_{19}\text{BrN}_2\text{O}_2\text{Na}$   $[\text{M}+\text{Na}]^+$ : 469.0522, Found: 469.0519.

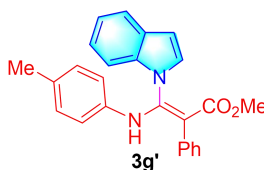

The reaction was run at 60 °C for 3 h, affording product **3g'** as a yellow solid (98% yield, 37.4 mg).  $^1\text{H}$  NMR (400 MHz,  $\text{CDCl}_3$ )  $\delta$  2.12 (s, 3H), 3.78 (s, 3H), 6.30 (dd,  $J = 3.2, 0.3$  Hz, 1H), 6.43 (d,  $J = 8.3$  Hz, 2H), 6.72 (d,  $J = 3.2$  Hz, 1H), 6.79 (d,  $J = 8.0$  Hz, 2H), 6.97-7.06 (m, 7H), 7.33 (d,  $J = 8.3$  Hz, 1H), 7.38 (d,  $J = 7.2$  Hz, 1H), 10.86 (s, 1H);  $^{13}\text{C}$  NMR (100 MHz,  $\text{CDCl}_3$ )  $\delta$  170.6, 149.3, 136.3, 135.1, 135.0, 133.3, 130.7, 129.5, 128.4, 127.5, 127.4, 126.0, 122.7,



120.8, 120.5, 120.2, 111.9, 105.1, 99.1, 51.7, 20.6; HRMS (ESI): Exact mass calcd for  $C_{25}H_{22}N_2O_2Na$   $[M+Na]^+$ : 405.1573, Found: 405.1574.

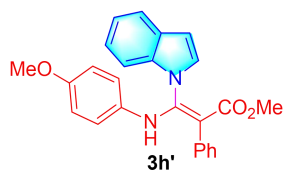

The reaction was run at 60 °C for 3 h, affording product **3h'** as a yellow solid (94% yield, 37.4 mg).  $^1H$  NMR (400 MHz,  $CDCl_3$ )  $\delta$  3.61 (s, 3H), 3.78 (s, 3H), 6.29 (d,  $J = 3.2$  Hz, 1H), 6.54 (s, 4H), 6.73 (d,  $J = 3.2$  Hz, 1H), 6.98-7.08 (m, 7H), 7.34 (d,  $J = 8.0$  Hz, 1H), 7.37 (d,  $J = 7.6$  Hz, 1H), 10.86 (s, 1H);  $^{13}C$  NMR (100 MHz,  $CDCl_3$ )  $\delta$  170.7, 156.1, 149.7, 135.03, 134.98, 131.9, 130.7, 128.3, 127.5, 127.4, 126.0, 122.6, 122.0, 120.7, 120.4, 114.1, 111.9, 105.0, 98.7, 55.1, 51.6; HRMS (ESI): Exact mass calcd for  $C_{25}H_{22}N_2O_3Na$   $[M+Na]^+$ : 421.1523, Found: 421.1528.

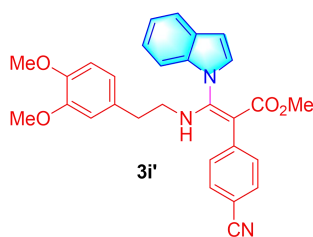

The reaction was run at 60 °C for 6 h, affording product **3i'** as a yellow solid (83% yield, 39.9 mg).  $^1H$  NMR (400 MHz,  $CDCl_3$ ):  $\delta$  2.71 (t,  $J = 7.2$  Hz, 2H), 3.00-3.08 (m, 1H), 3.19-3.25 (m, 1H), 3.72 (s, 3H), 3.79 (s, 3H), 3.86 (s, 3H), 6.24 (s, 2H), 6.49 (s, 1H), 6.58 (d,  $J = 8.3$  Hz, 1H), 6.76 (d,  $J = 8.0$  Hz, 1H), 6.86 (d,  $J = 7.6$  Hz, 2H), 7.12 (t,  $J = 7.6$  Hz, 1H), 7.17-7.22 (m, 3H), 7.25-7.26 (m, 1H), 7.49 (d,  $J = 8.0$  Hz, 1H), 9.34 (s, 1H);  $^{13}C$  NMR (100 MHz,  $CDCl_3$ )  $\delta$  169.7, 154.5, 148.8, 147.7, 141.0, 135.6, 131.1, 130.9, 130.6, 128.3, 127.2, 123.3, 121.3, 121.1, 120.8, 119.1, 112.0, 111.1, 110.9, 108.9, 104.7, 95.4, 55.9, 55.6, 51.4, 45.7, 36.9; HRMS (ESI): Exact mass calcd for  $C_{29}H_{27}N_3O_4Na$   $[M+Na]^+$ : 504.1894, Found: 504.1903.

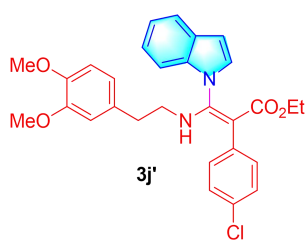

The reaction was run at 60 °C for 5 h, affording product **3j'** as a yellow solid (89% yield, 44.9 mg).  $^1H$  NMR (400 MHz,  $CDCl_3$ ):  $\delta$  1.23 (t,  $J = 7.6$  Hz, 3H), 2.69 (t,  $J = 6.8$  Hz, 2H), 2.91-3.00 (m, 1H), 3.10-3.18 (m, 1H), 3.78 (s, 3H), 3.85 (s, 3H), 4.12-4.28 (m, 2H), 6.24 (s, 1H), 6.29 (s, 1H), 6.47 (s, 1H), 6.57 (d,  $J = 8.3$  Hz, 1H), 6.71-6.76 (m, 3H), 6.88 (d,  $J = 8.0$  Hz, 2H), 7.11 (t,  $J = 7.6$  Hz, 1H), 7.20 (t,  $J = 7.6$  Hz, 1H), 7.32 (d,  $J = 8.3$  Hz, 1H), 7.48 (d,  $J = 8.0$  Hz, 1H), 9.26 (t,  $J = 6.0$  Hz, 1H);  $^{13}C$  NMR (100 MHz,  $CDCl_3$ )  $\delta$  170.0, 154.0, 148.8, 147.6, 135.7, 134.2, 131.7, 131.3, 130.8, 128.3, 127.6, 127.4, 122.9, 120.9, 120.8, 112.0, 111.09, 111.06, 104.1, 96.1, 60.0, 55.9, 55.6, 45.5, 37.1, 14.4; HRMS (ESI): Exact mass calcd for  $C_{29}H_{29}ClN_2O_4Na$   $[M+Na]^+$ : 527.1708, Found: 527.1711.

### 3) Synthetic Transformation of Product 3y.

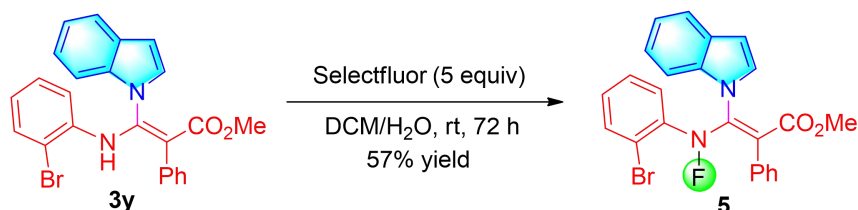

To a 5.0 mL vial was successively added **3y** (0.1 mmol, 1.0 equiv), DCM/H<sub>2</sub>O (v/v = 1:1, 2 mL), and selectfluor (0.50 mmol, 5 equiv). The vial was capped and the reaction mixture was allowed to stir at room temperature for 72 h. Upon completion, the mixture was extracted with DCM (5 mL \* 3), and the combined organic layers were dried over anhydrous Na<sub>2</sub>SO<sub>4</sub>. After evaporation of the solvent in vacuo, the residue was purified by silica gel chromatography eluting with petroleum ether/ethyl acetate (5:1 to 2:1) to afford compound **5** (26.4 mg, pale-yellow solid).

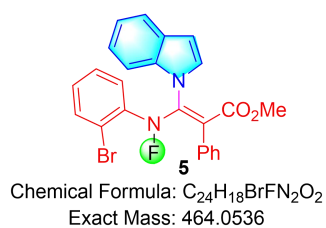

<sup>1</sup>H NMR (400 MHz, CDCl<sub>3</sub>) δ 3.89 (s, 3H), 6.18 (d, *J* = 7.2 Hz, 1H), 6.47 (d, *J* = 3.2 Hz, 1H), 6.77-6.83 (m, 2H), 6.98-7.04 (m, 4H), 7.39-7.42 (m, 4H), 7.54-7.57 (m, 1H), 7.71-7.74 (m, 2H);  
<sup>13</sup>C NMR (100 MHz, CDCl<sub>3</sub>) δ 167.1 (d, *J* = 26.8 Hz), 144.4, 134.7, 134.0, 133.8, 133.1, 129.4, 128.3, 128.3, 127.6, 126.9, 125.9 (d, *J* = 9.0 Hz), 125.5 (d, *J* = 4.7 Hz), 123.1, 121.4, 120.6, 119.6, 118.2, 112.3, 106.2, 53.6; <sup>19</sup>F NMR (376 MHz, CDCl<sub>3</sub>) δ -158.9; HRMS (ESI): Exact mass calcd for C<sub>24</sub>H<sub>18</sub>BrFN<sub>2</sub>O<sub>2</sub>Na [M+Na]<sup>+</sup>: 487.0428, Found: 487.0440.

#### 4) X-Ray crystallographic data for compound **3g**.

Data intensity of **3g** was collected using a Bruker 'Bruker APEX-II CCD' diffractometer at 149.99(10) K. Data collection and reduction were done by using Olex2 and the structure was solved with the ShelXS structure solution program using direct methods and refined by full-matrix least-squares on F<sup>2</sup> with anisotropic displacement parameters for non-H atoms using SHELX-97. Hydrogen atoms were added at their geometrically ideal positions and refined isotropically. CCDC deposition number 2249124 (**3g**).

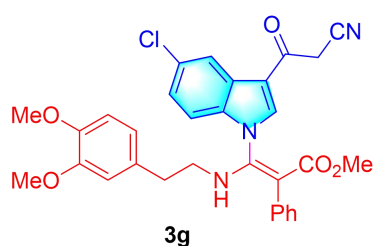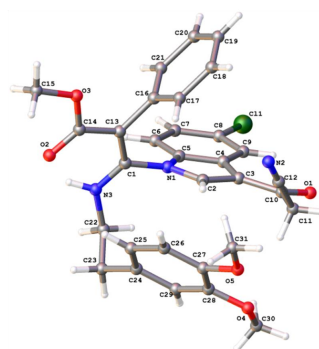

X-Ray structure of product **3g**

|                                    |                                                                 |
|------------------------------------|-----------------------------------------------------------------|
| Crystal data.                      |                                                                 |
| Formula weight                     | 558.01                                                          |
| Empirical formula                  | C <sub>31</sub> H <sub>28</sub> ClN <sub>3</sub> O <sub>5</sub> |
| Temperature/K                      | 149.99(10)                                                      |
| Space group                        | P-1                                                             |
| Crystal system                     | triclinic                                                       |
| a/Å                                | 8.9246(6)                                                       |
| b/Å                                | 9.5581(6)                                                       |
| c/Å                                | 19.710(3)                                                       |
| α/°                                | 79.501(7)                                                       |
| β/°                                | 79.413(8)                                                       |
| γ/°                                | 85.021(5)                                                       |
| Volume/Å <sup>3</sup>              | 1622.6(3)                                                       |
| Z                                  | 2                                                               |
| ρ <sub>calc</sub> /cm <sup>3</sup> | 1.142                                                           |
| μ/mm <sup>-1</sup>                 | 1.366                                                           |
| F(000)                             | 584.0                                                           |
| Reflections collected              | 10860                                                           |
| Independent reflections            | 6395 [R <sub>int</sub> = 0.0518, R <sub>sigma</sub> = 0.0679]   |
| Final R indexes [I >= 2σ(I)]       | R <sub>1</sub> = 0.1272, wR <sub>2</sub> = 0.3391               |
| Final R indexes [all data]         | R <sub>1</sub> = 0.1408, wR <sub>2</sub> = 0.3533               |

## 5) DFT Calculation Results.

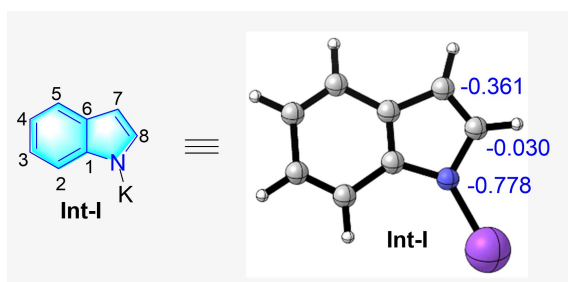

Figure S1. The calculated NBO net charges of N1, C2 and C3 atoms of indole anion intermediate **Int-I**.

Redundant internal coordinates found in file.

C, 0, 2.4376263591, -0.4693175229, 0.  
C, 0, 1.0094560996, -0.5418907503, 0.  
C, 0, 0.2460740235, 0.6394996451, 0.  
C, 0, 0.887225519, 1.8665534559, 0.  
C, 0, 2.294396899, 1.9379297536, 0.  
C, 0, 3.0649405543, 0.7878886019, 0.  
C, 0, 2.8808436419, -1.8237706974, 0.  
C, 0, 1.734609945, -2.5911823119, 0.  
H, 0, -0.8518256986, 0.6261934537, 0.  
H, 0, 0.3028088925, 2.7820959674, 0.  
H, 0, 2.7753395583, 2.911584529, 0.  
H, 0, 4.1501209338, 0.8572353118, 0.  
H, 0, 3.9016392874, -2.1808275035, 0.  
H, 0, 1.6736263196, -3.6746906662, 0.  
N, 0, 0.5858934973, -1.8499766815, 0.  
K, 0, -1.5405555717, -1.6918457947, 0

Mulliken charges:

1 C 0.071130  
2 C 0.277162  
3 C -0.213879  
4 C -0.193611  
5 C -0.184178  
6 C -0.206853  
7 C -0.262559

8 C -0.013316  
 9 H 0.093472  
 10 H 0.132461  
 11 H 0.133925  
 12 H 0.140763  
 13 H 0.131572  
 14 H 0.128539  
 15 N -0.718867  
 16 K 0.684239

Summary of Natural Population Analysis:

| Atom      | No | Charge   | Core     | Valence  | Rydberg | Total    |
|-----------|----|----------|----------|----------|---------|----------|
| C         | 1  | -0.11676 | 1.99906  | 4.10296  | 0.01474 | 6.11676  |
| C         | 2  | 0.13183  | 1.99906  | 3.85114  | 0.01797 | 5.86817  |
| C         | 3  | -0.29337 | 1.99903  | 4.28283  | 0.01151 | 6.29337  |
| C         | 4  | -0.26762 | 1.99914  | 4.25336  | 0.01512 | 6.26762  |
| C         | 5  | -0.28340 | 1.99914  | 4.27034  | 0.01392 | 6.28340  |
| C         | 6  | -0.22111 | 1.99906  | 4.20918  | 0.01288 | 6.22111  |
| C         | 7  | -0.36135 | 1.99902  | 4.35022  | 0.01211 | 6.36135  |
| C         | 8  | -0.03046 | 1.99921  | 4.00832  | 0.02293 | 6.03046  |
| H         | 9  | 0.16581  | 0.00000  | 0.83321  | 0.00097 | 0.83419  |
| H         | 10 | 0.22989  | 0.00000  | 0.76936  | 0.00075 | 0.77011  |
| H         | 11 | 0.23195  | 0.00000  | 0.76734  | 0.00072 | 0.76805  |
| H         | 12 | 0.23261  | 0.00000  | 0.76644  | 0.00095 | 0.76739  |
| H         | 13 | 0.23377  | 0.00000  | 0.76573  | 0.00051 | 0.76623  |
| H         | 14 | 0.21154  | 0.00000  | 0.78796  | 0.00050 | 0.78846  |
| N         | 15 | -0.77850 | 1.99947  | 5.76533  | 0.01369 | 7.77850  |
| K         | 16 | 0.91518  | 9.99751  | 0.08306  | 0.00425 | 10.08482 |
| -----     |    |          |          |          |         |          |
| * Total * |    | 0.00000  | 27.98969 | 43.86677 | 0.14353 | 72.00000 |

## 6) Copies of $^1\text{H}$ NMR and $^{13}\text{C}$ NMR Spectra of Products 3 and 5.

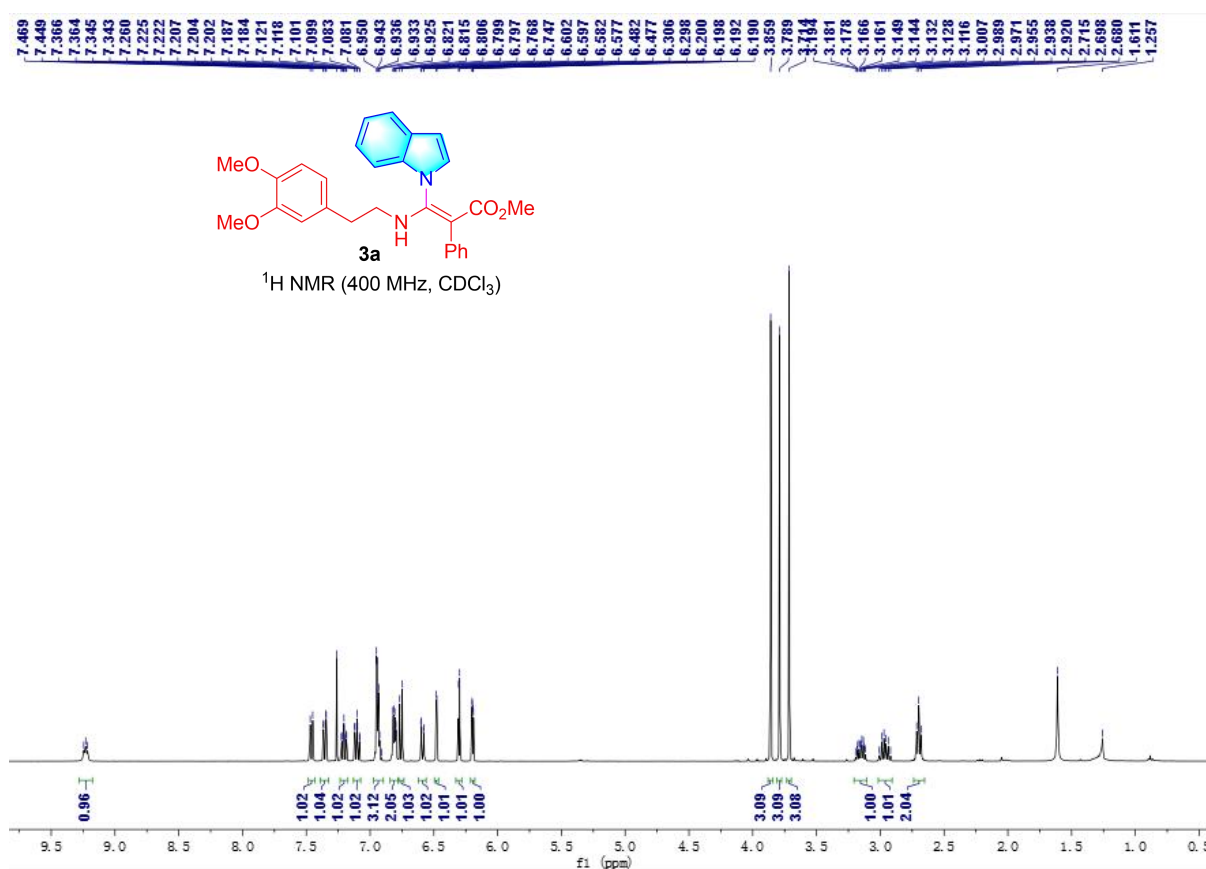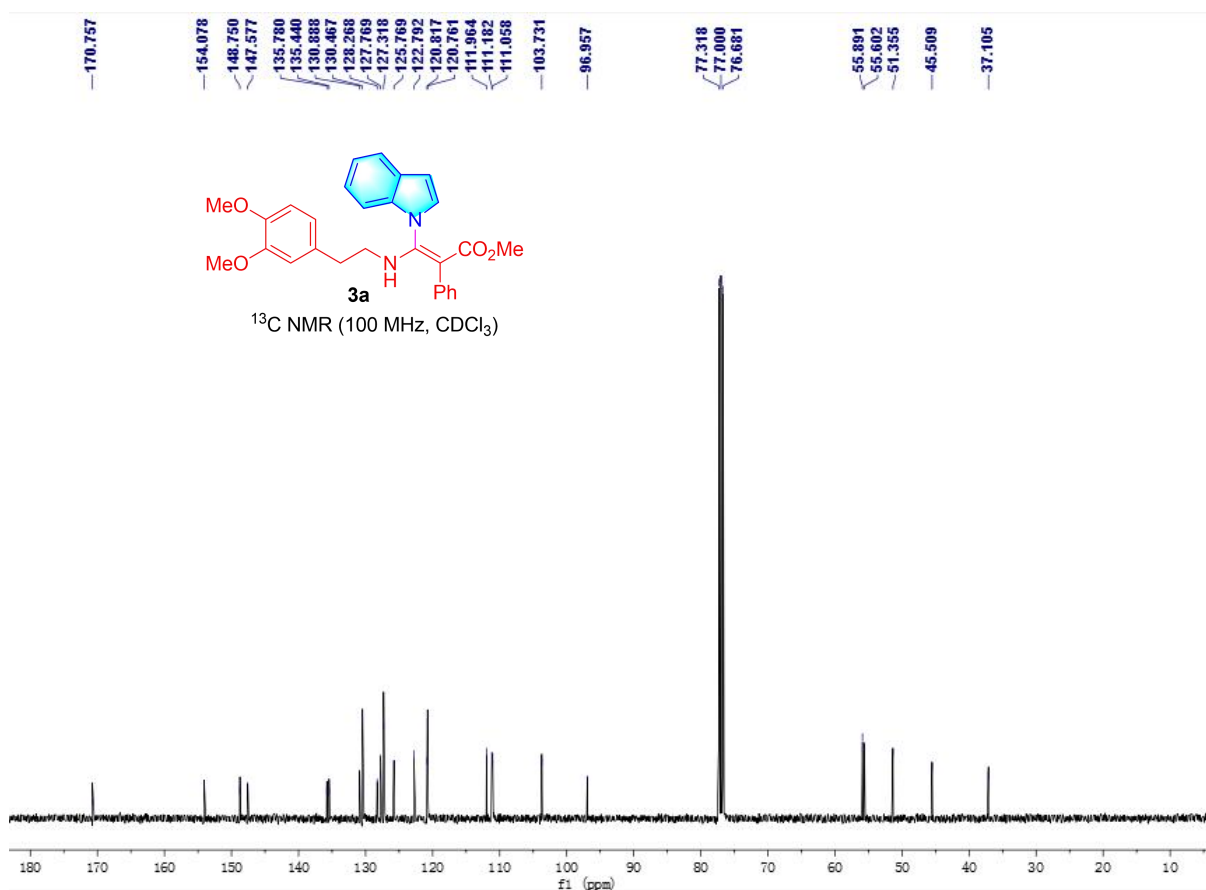

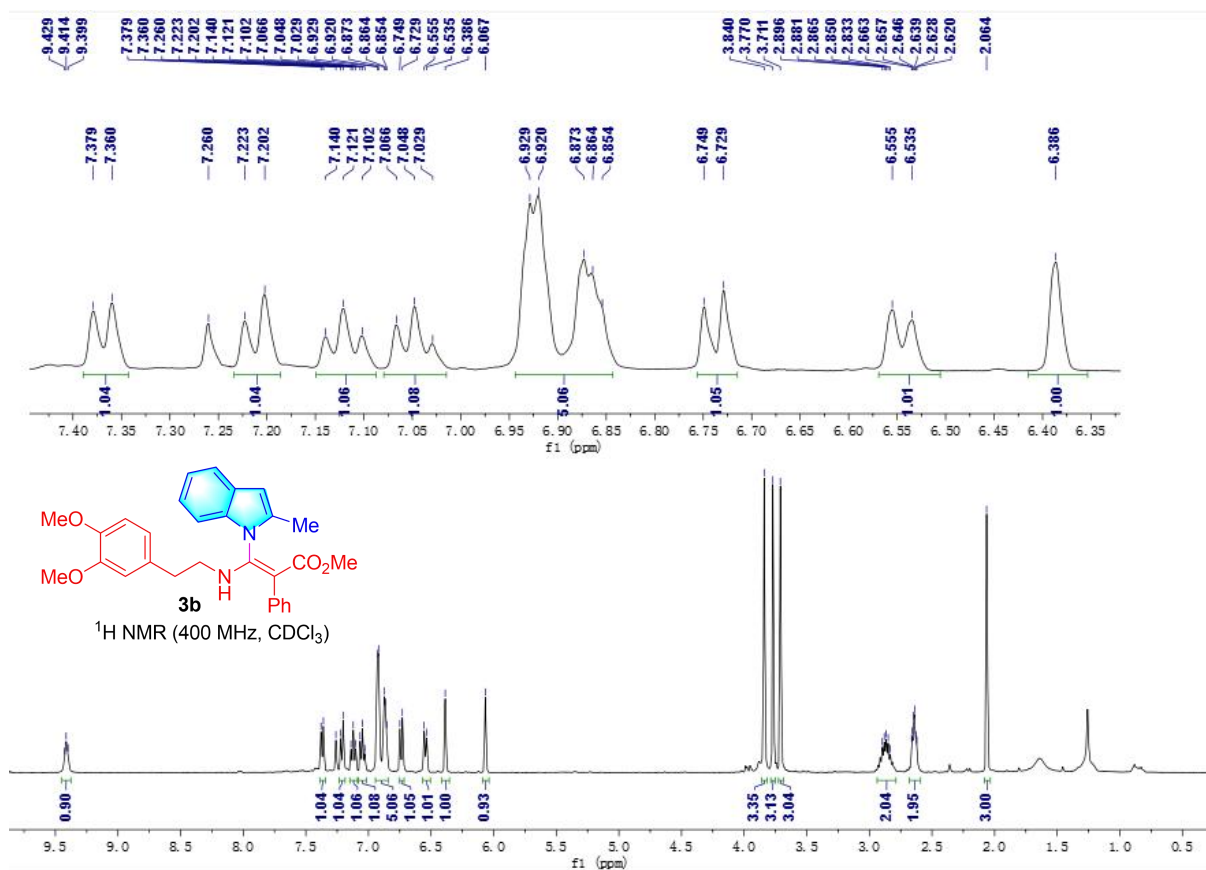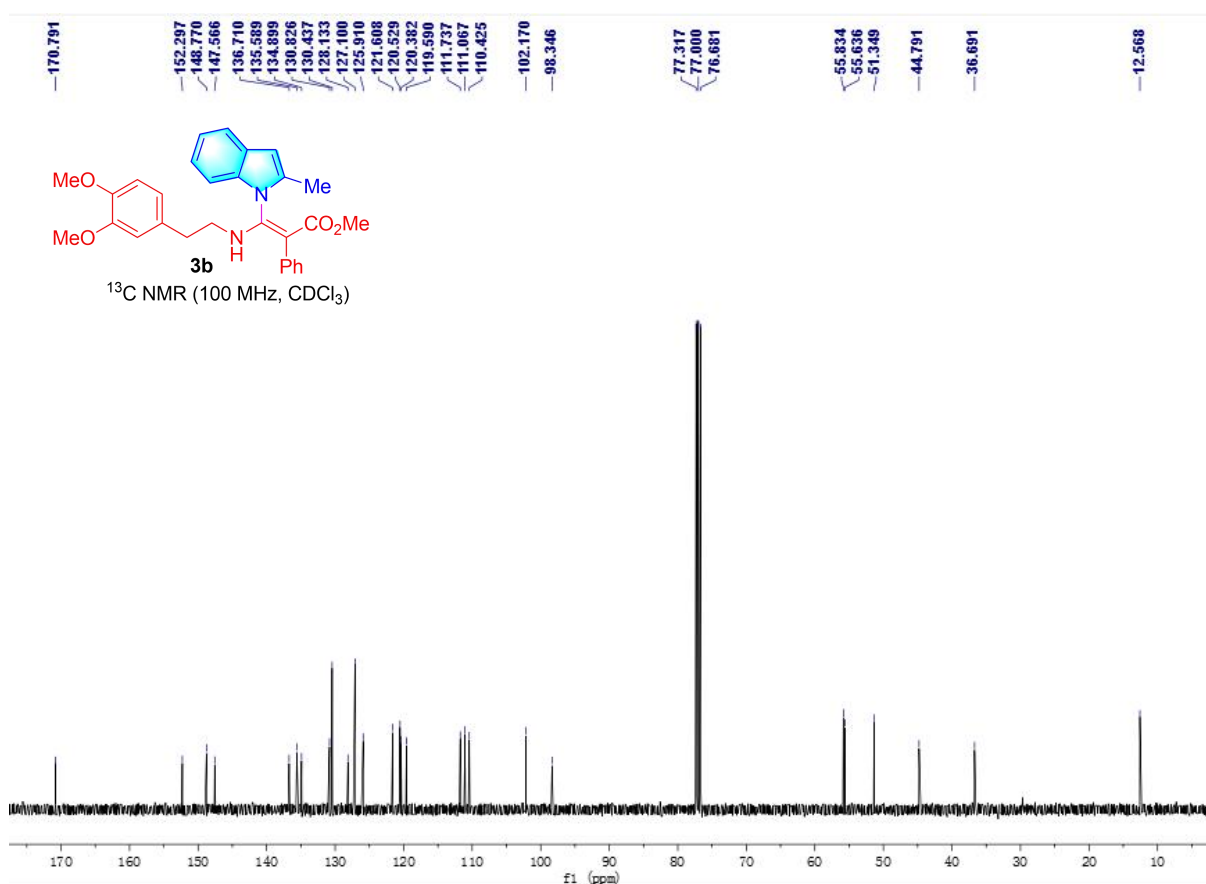

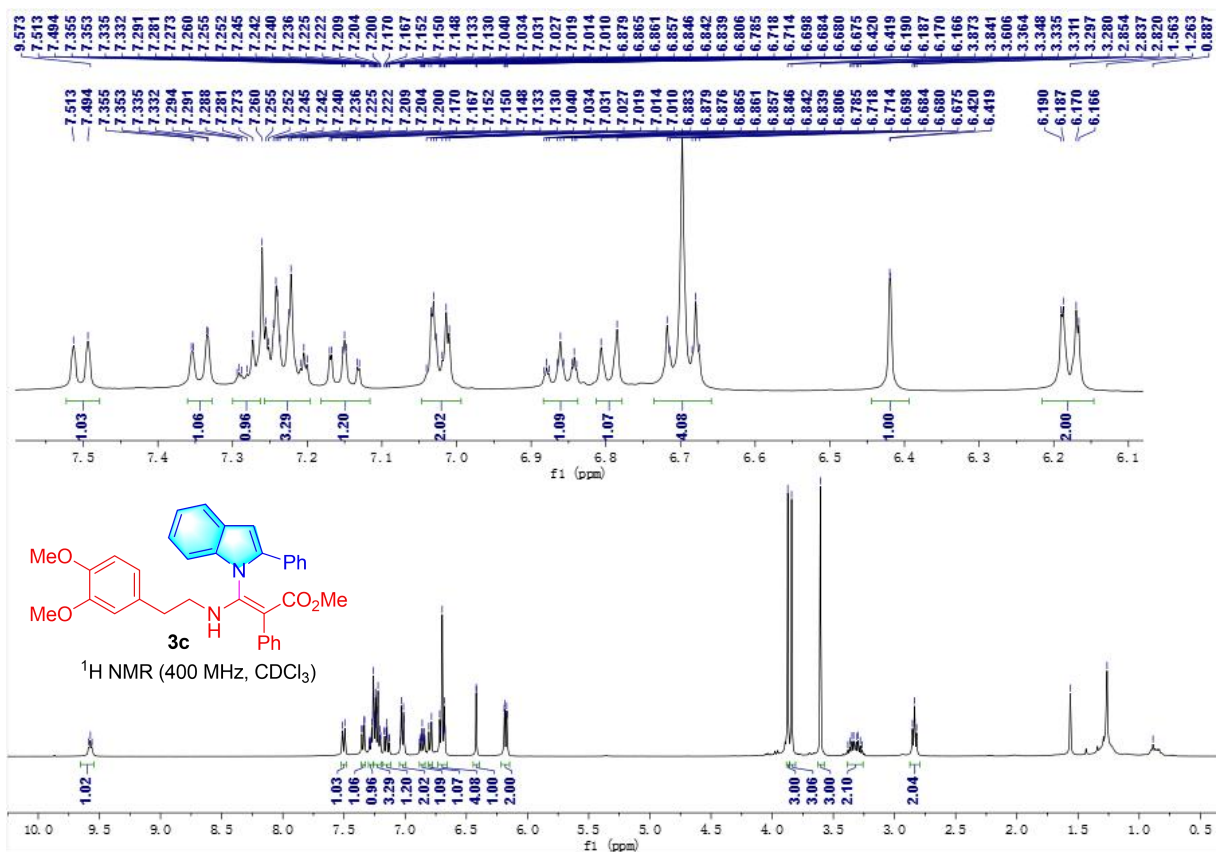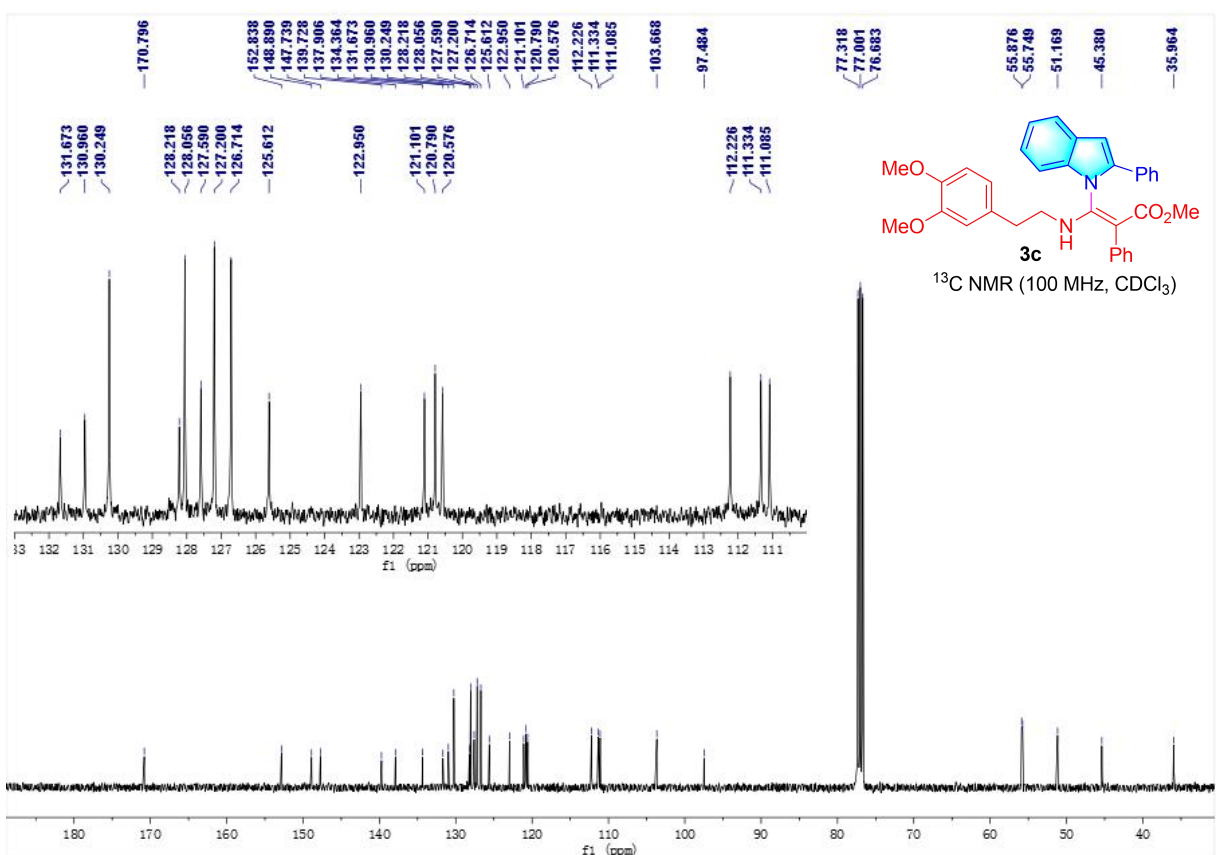





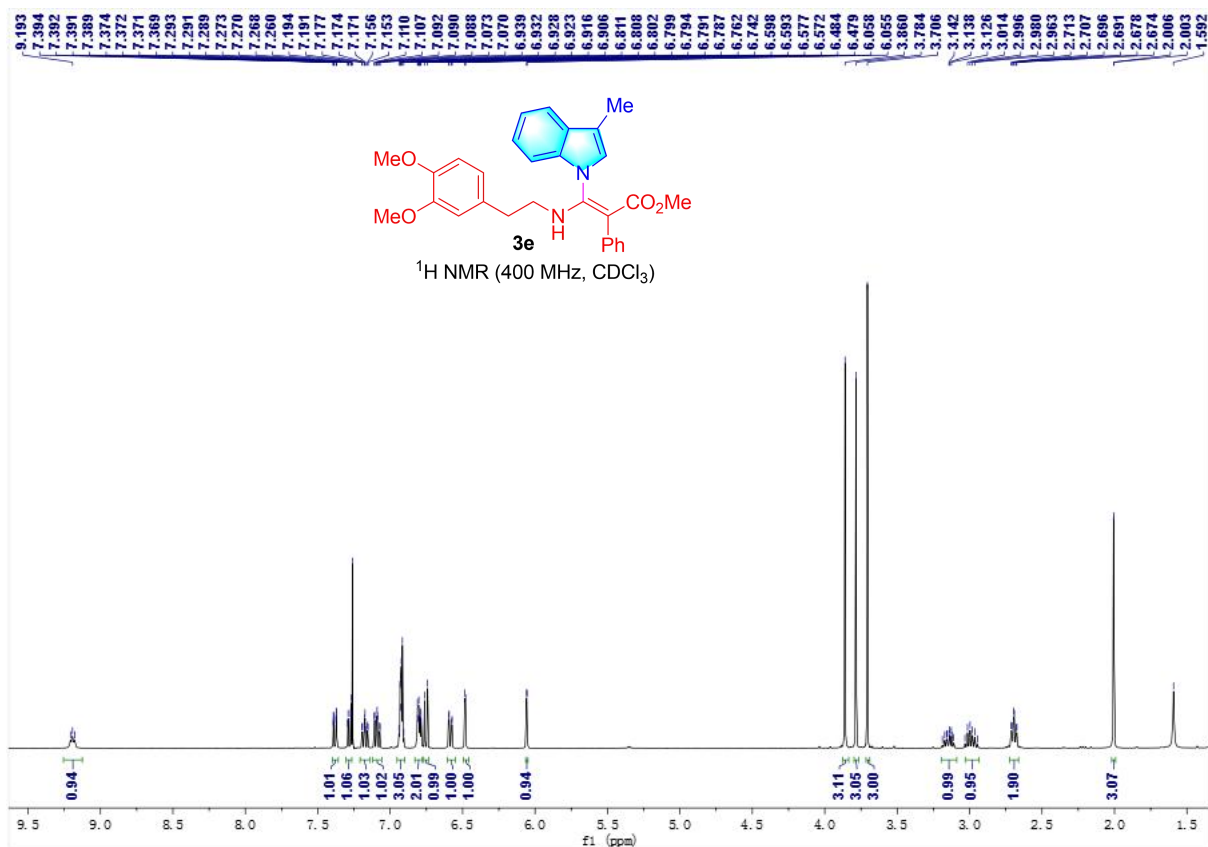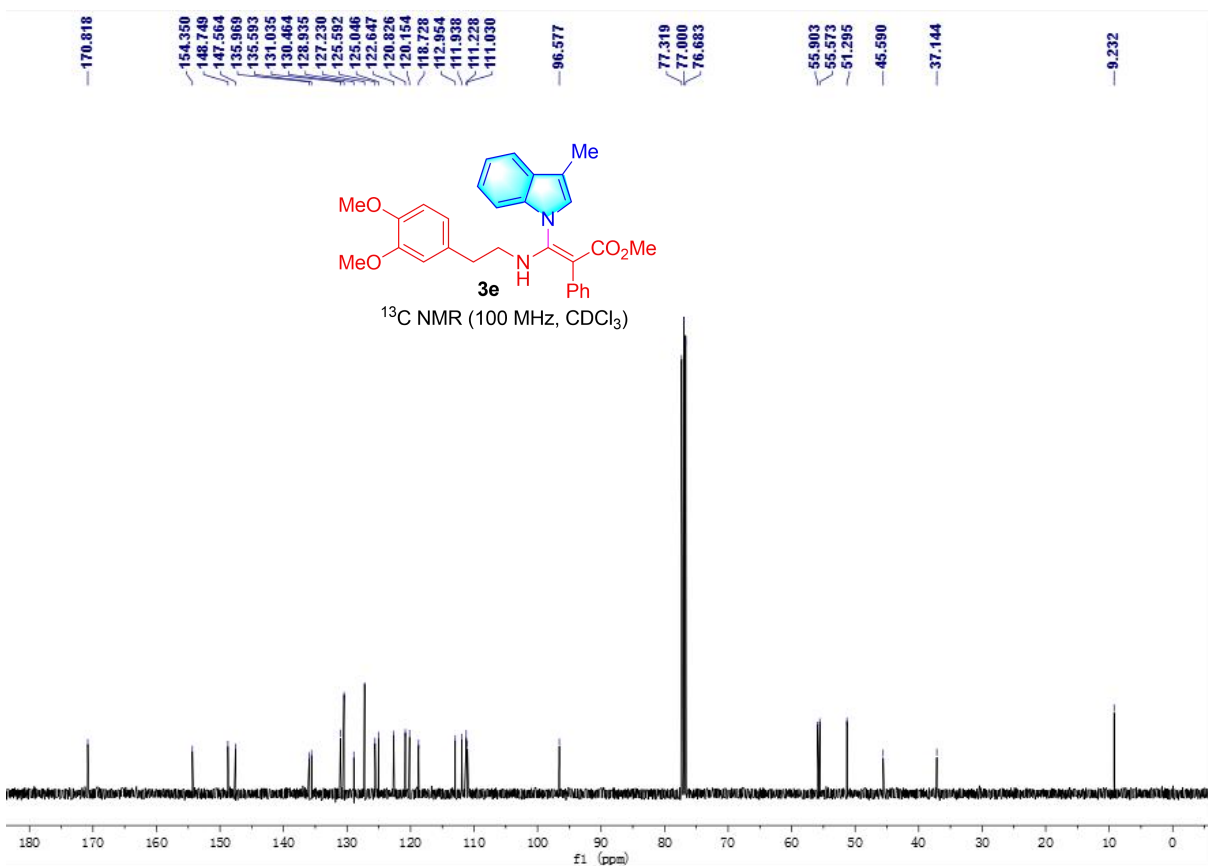

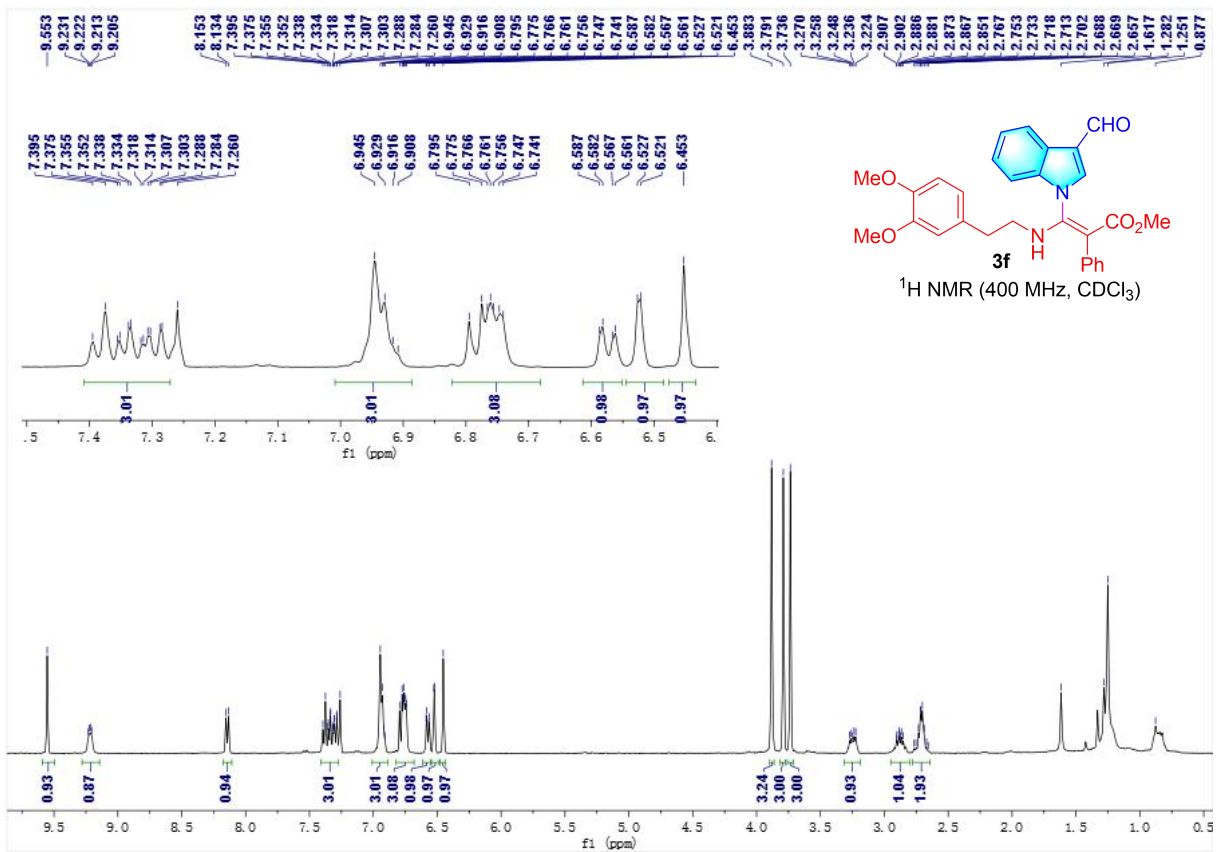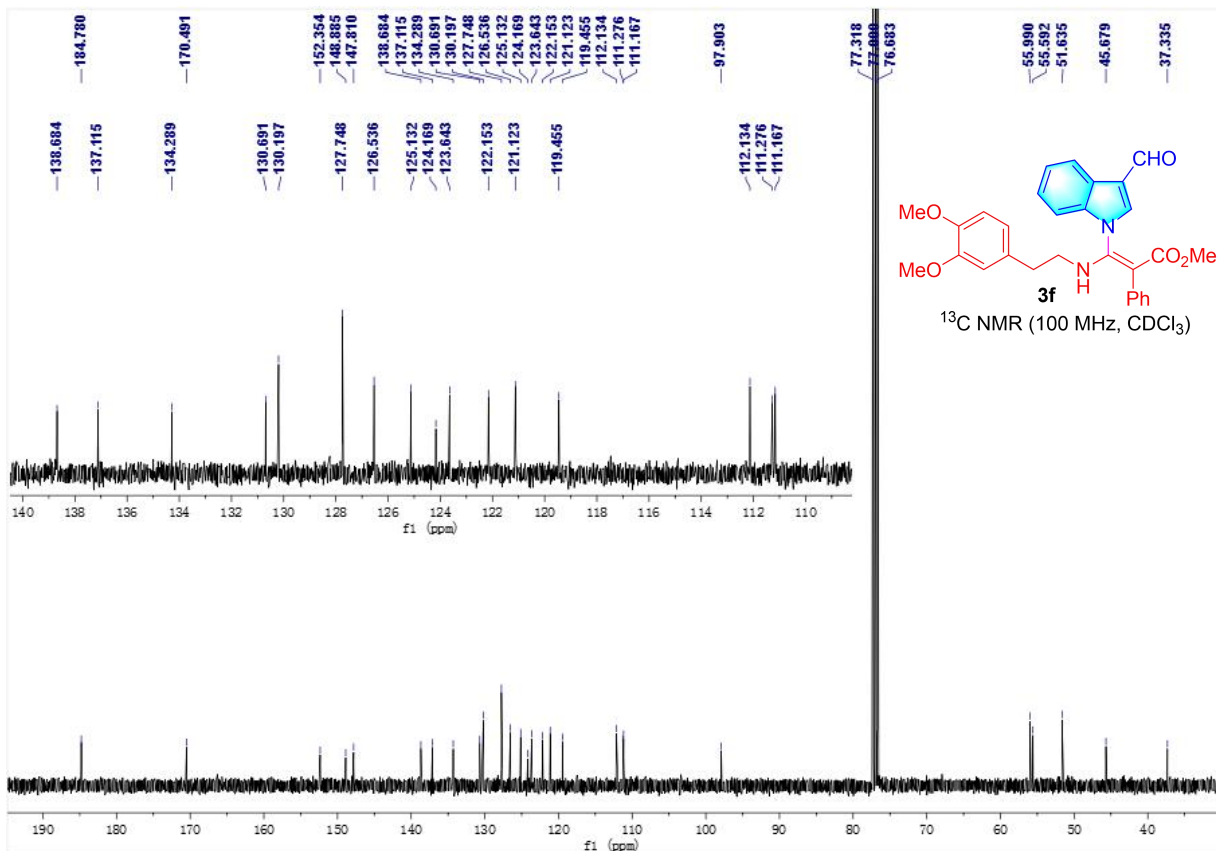

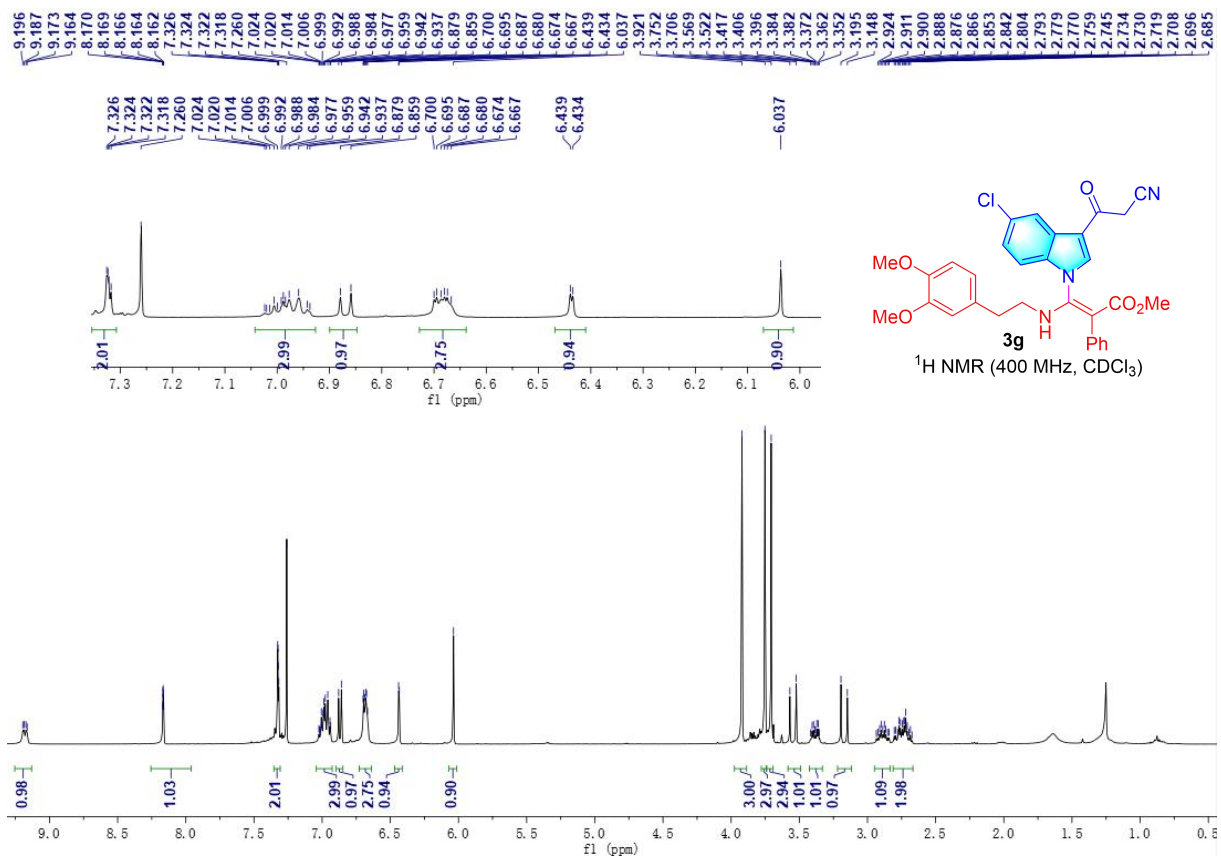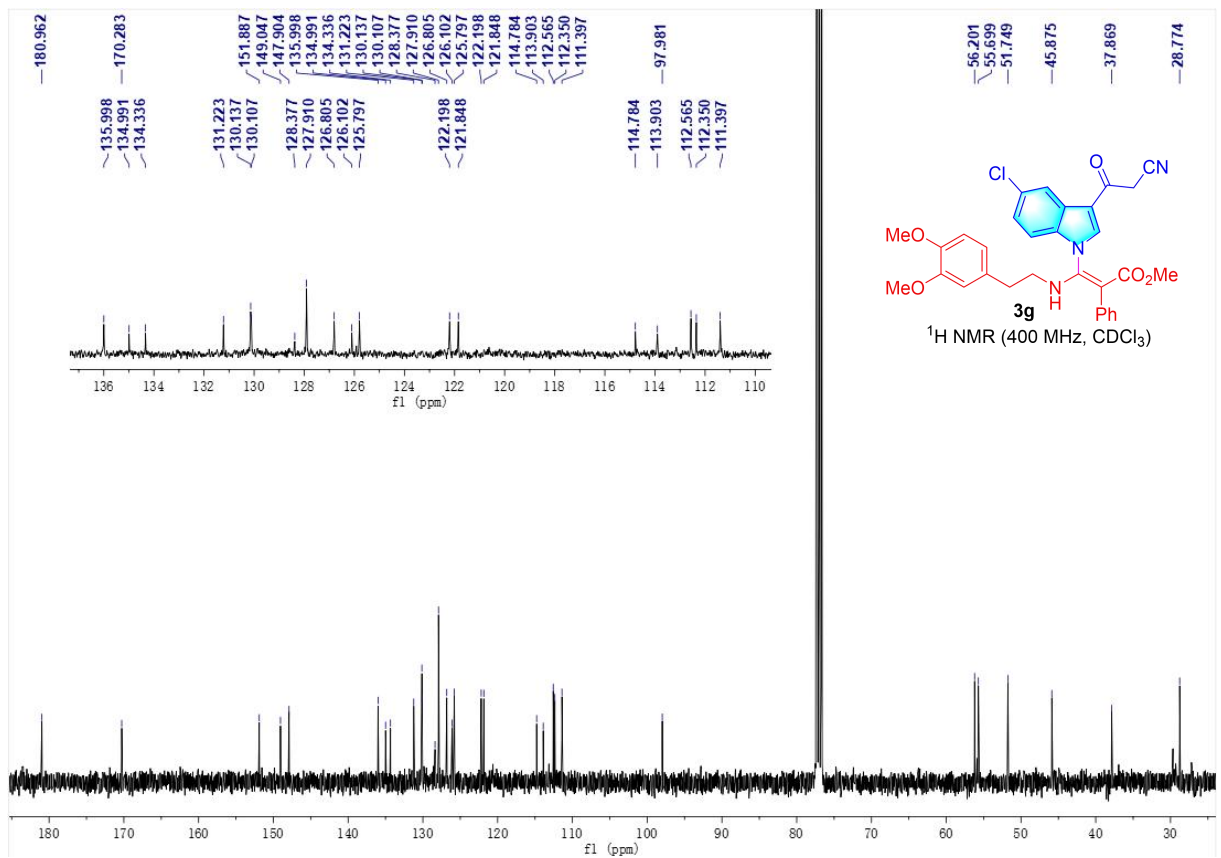

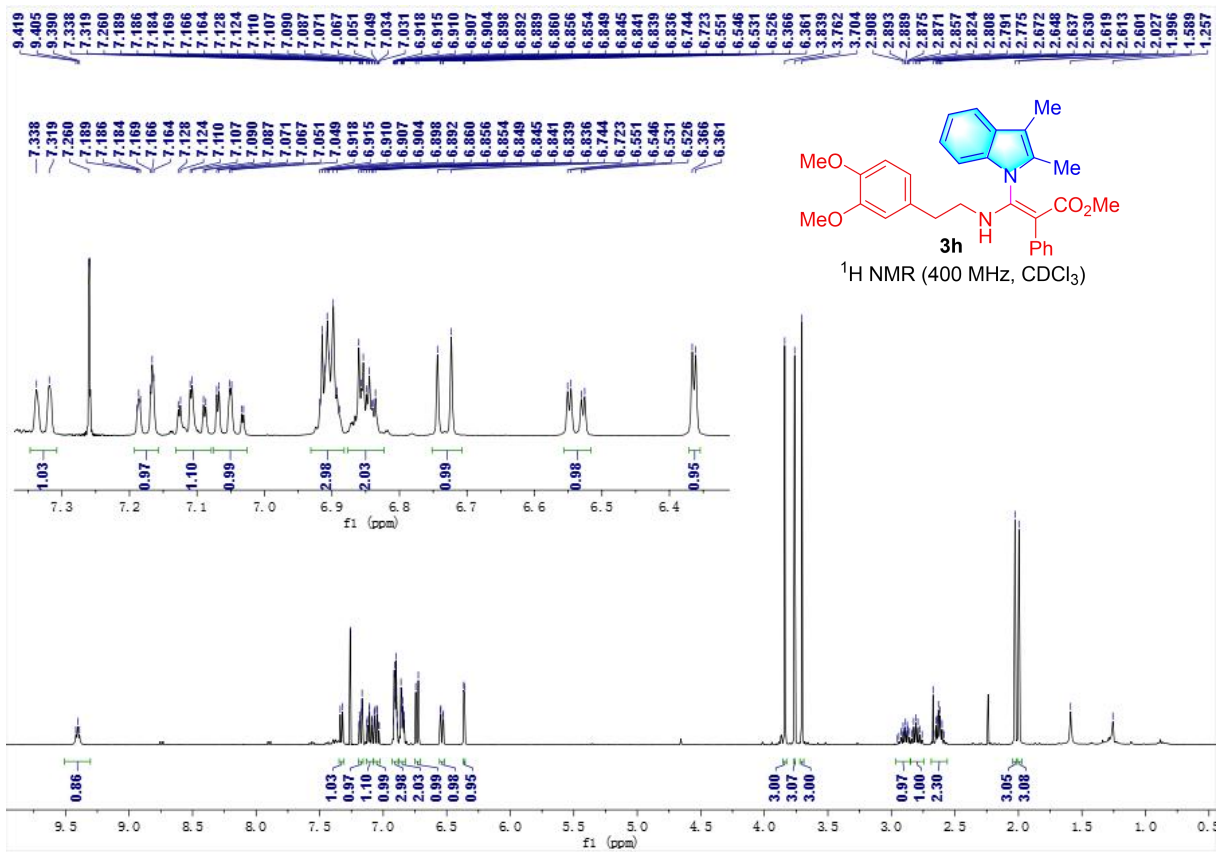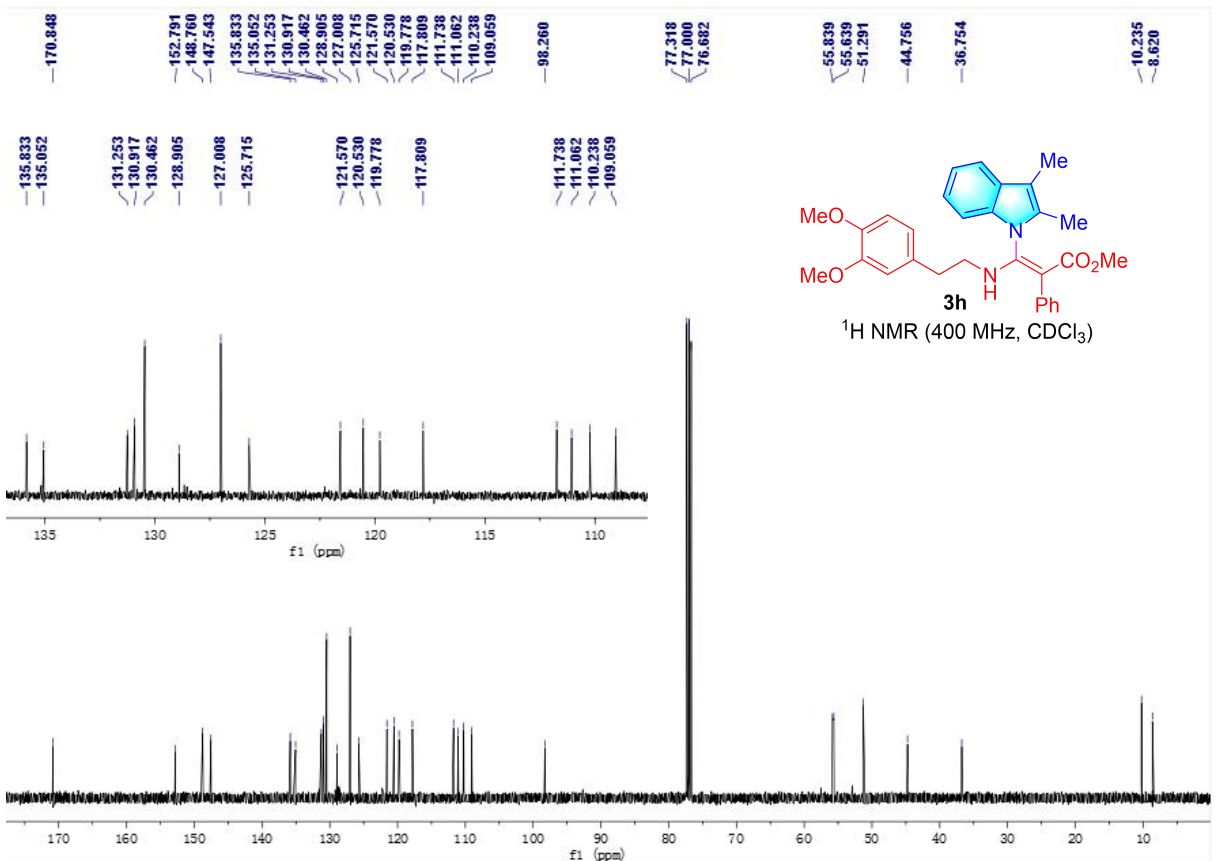



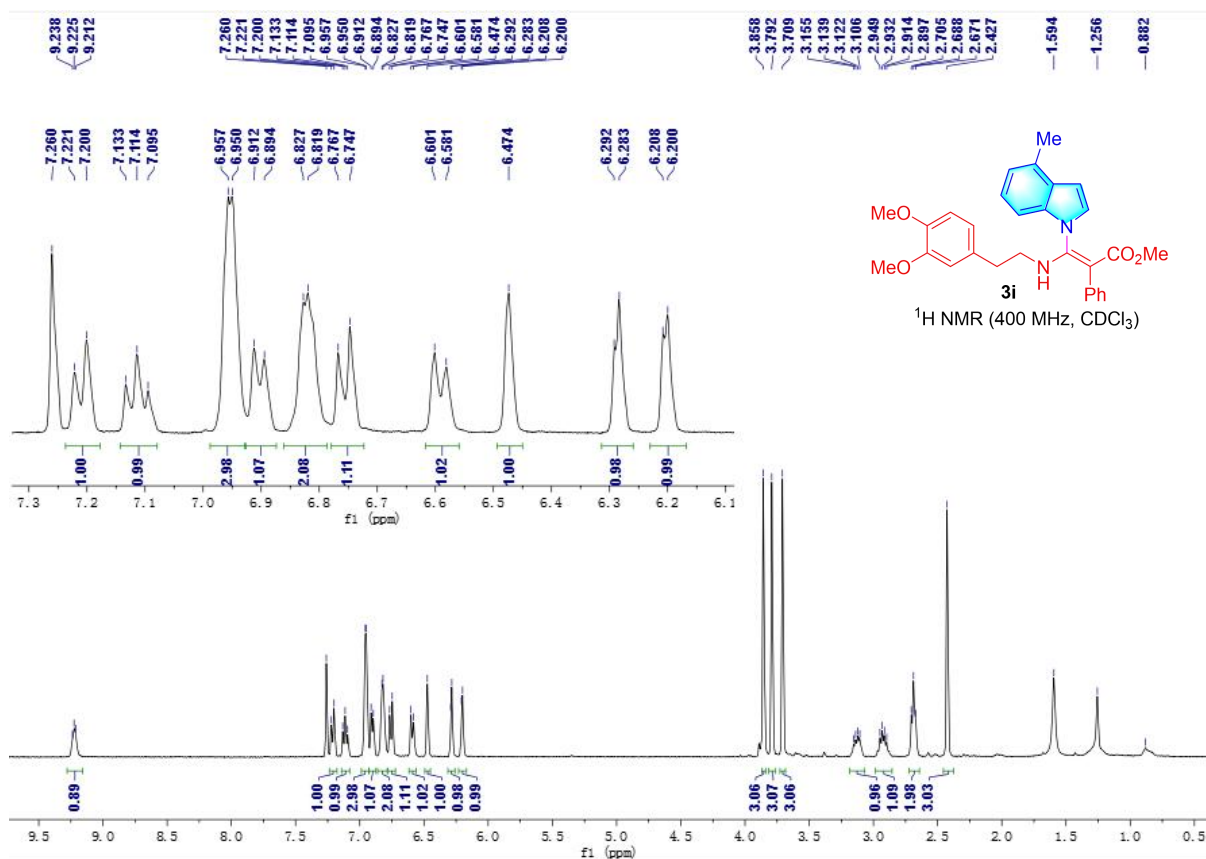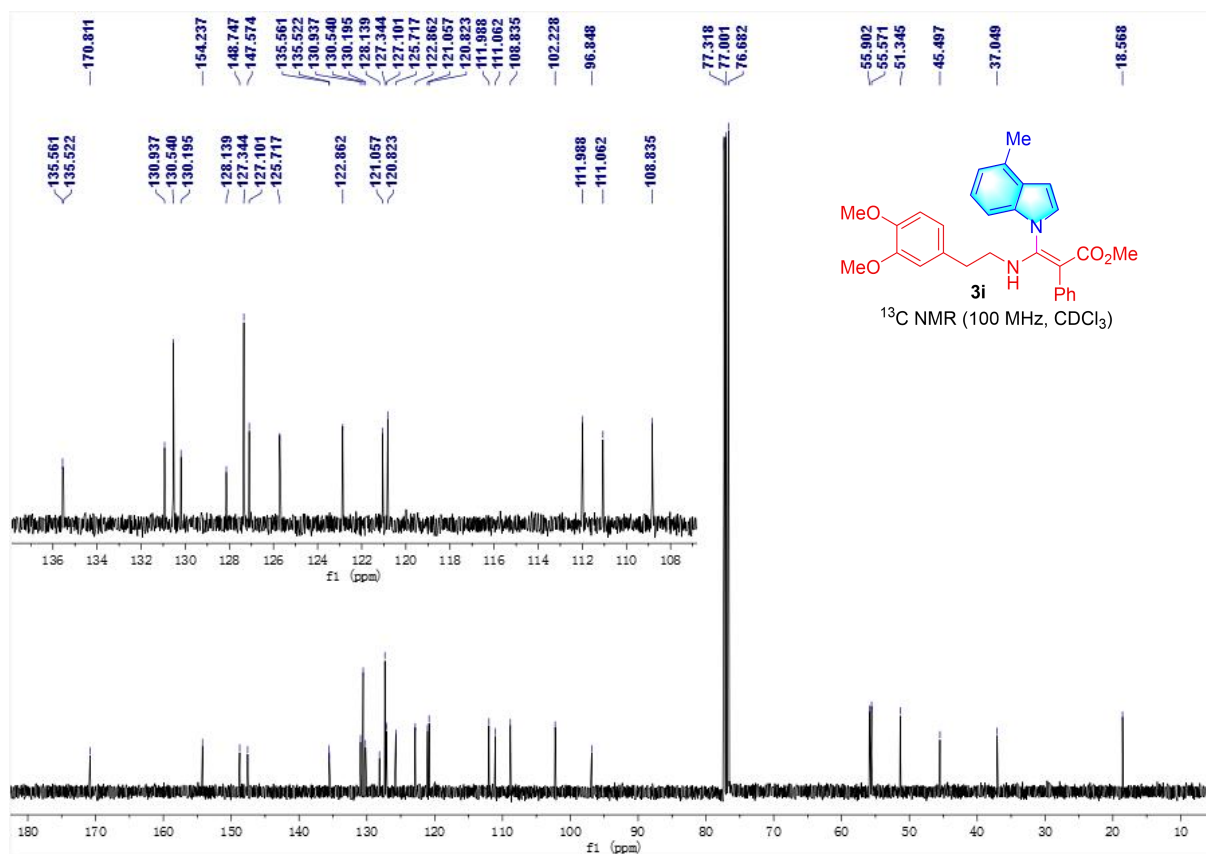

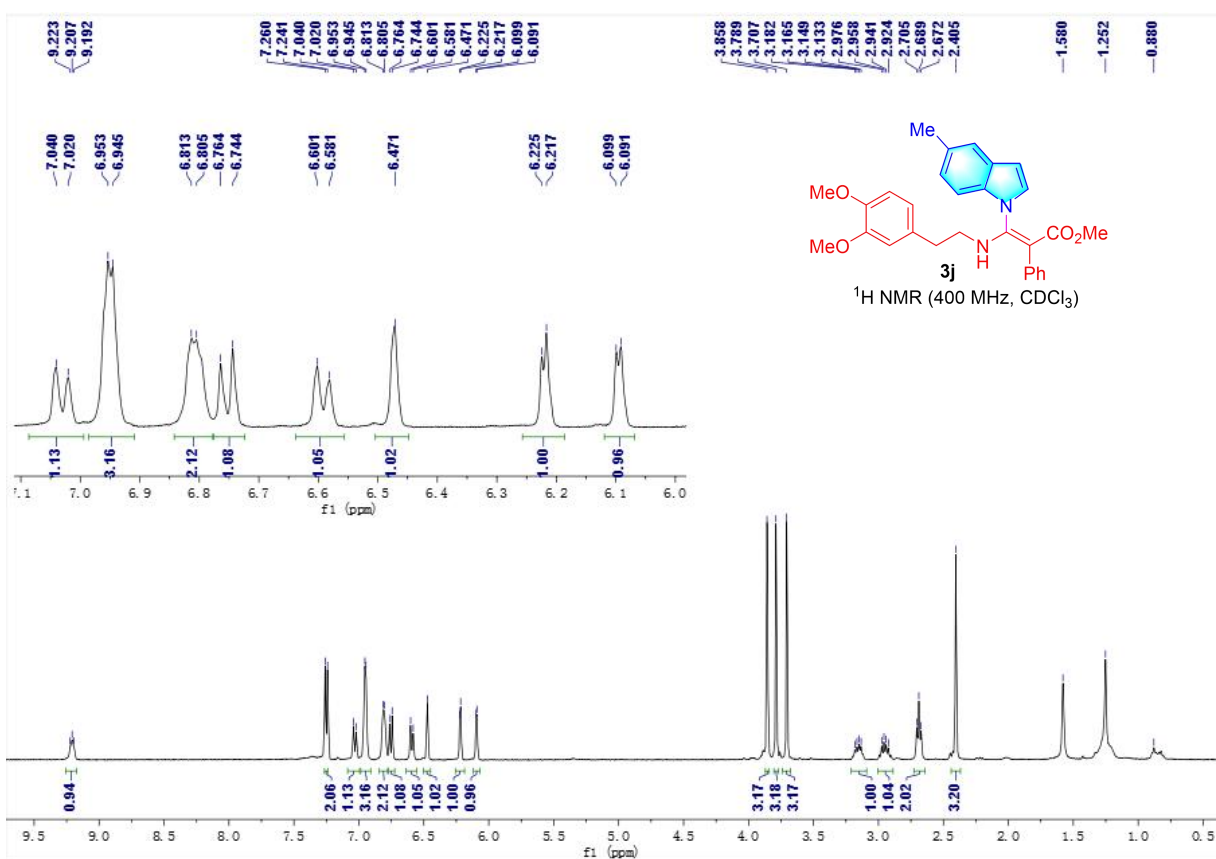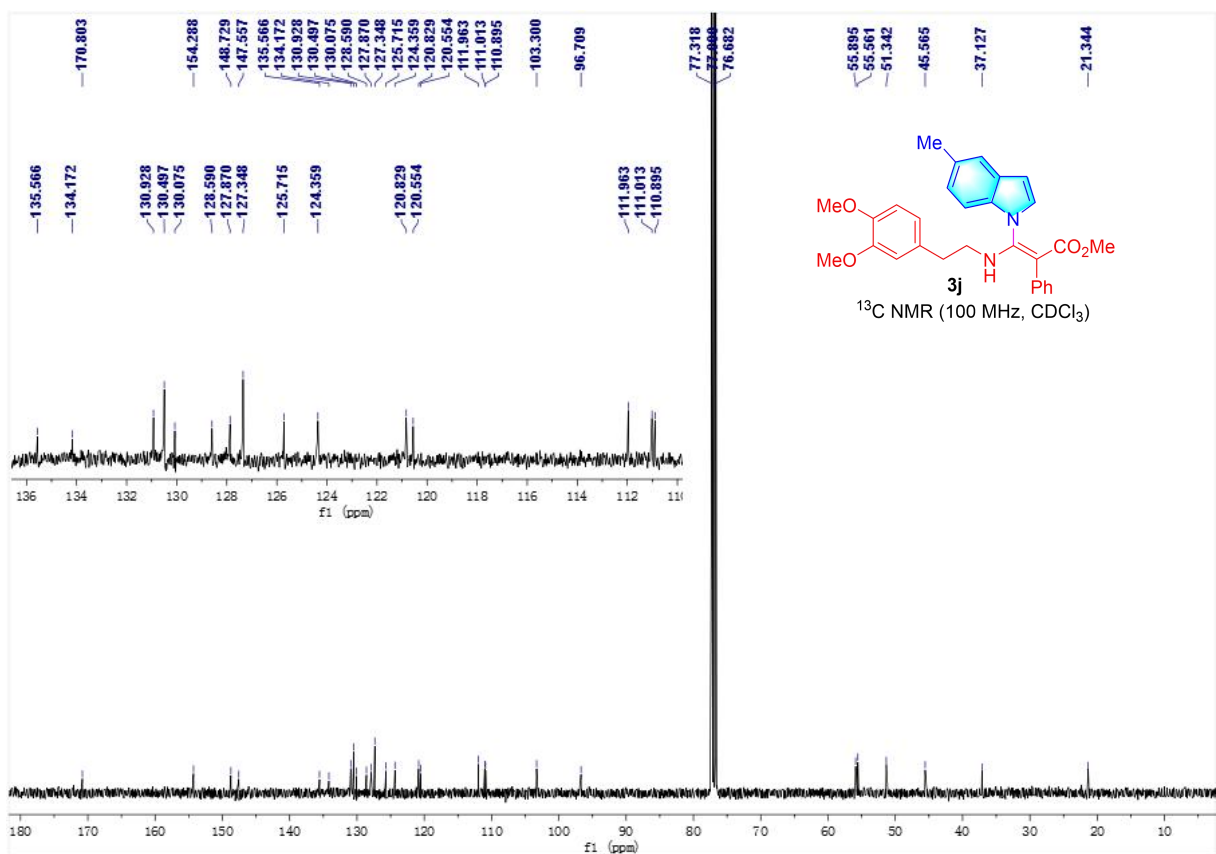

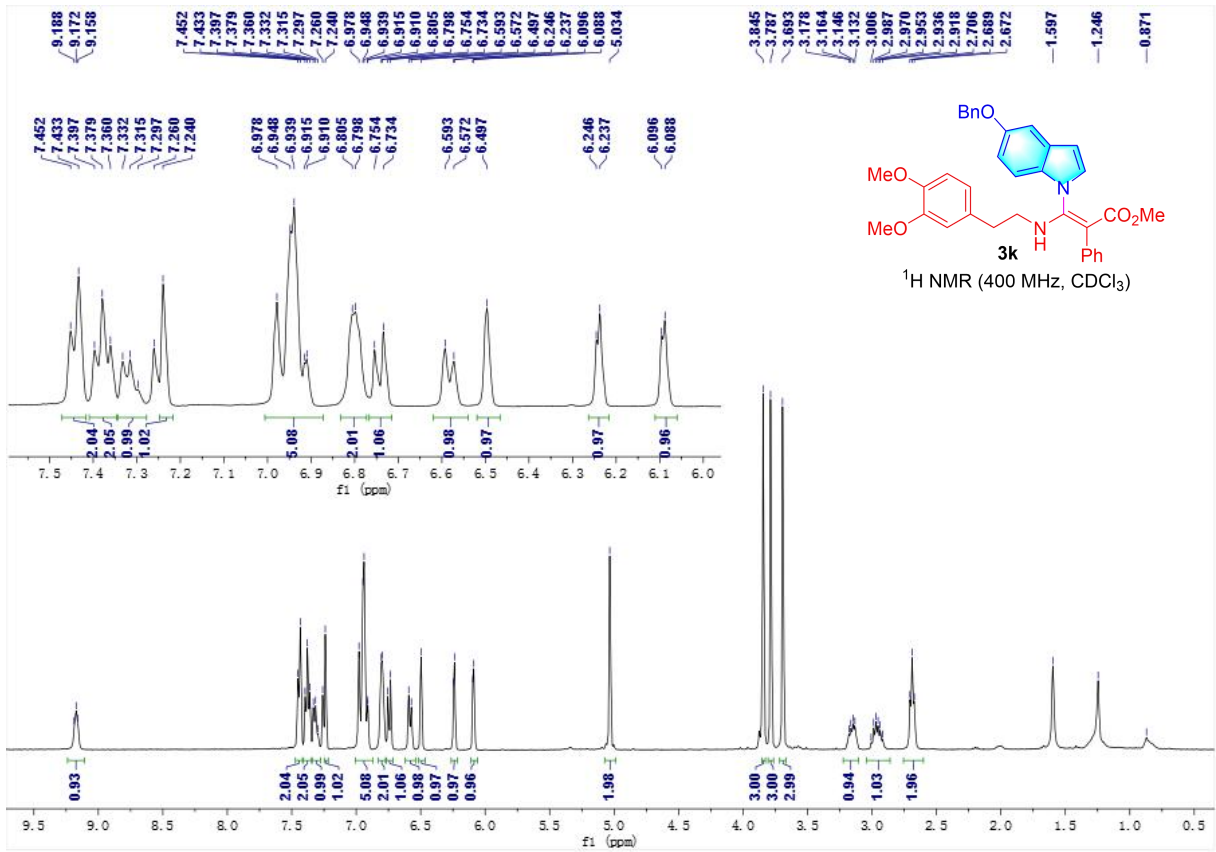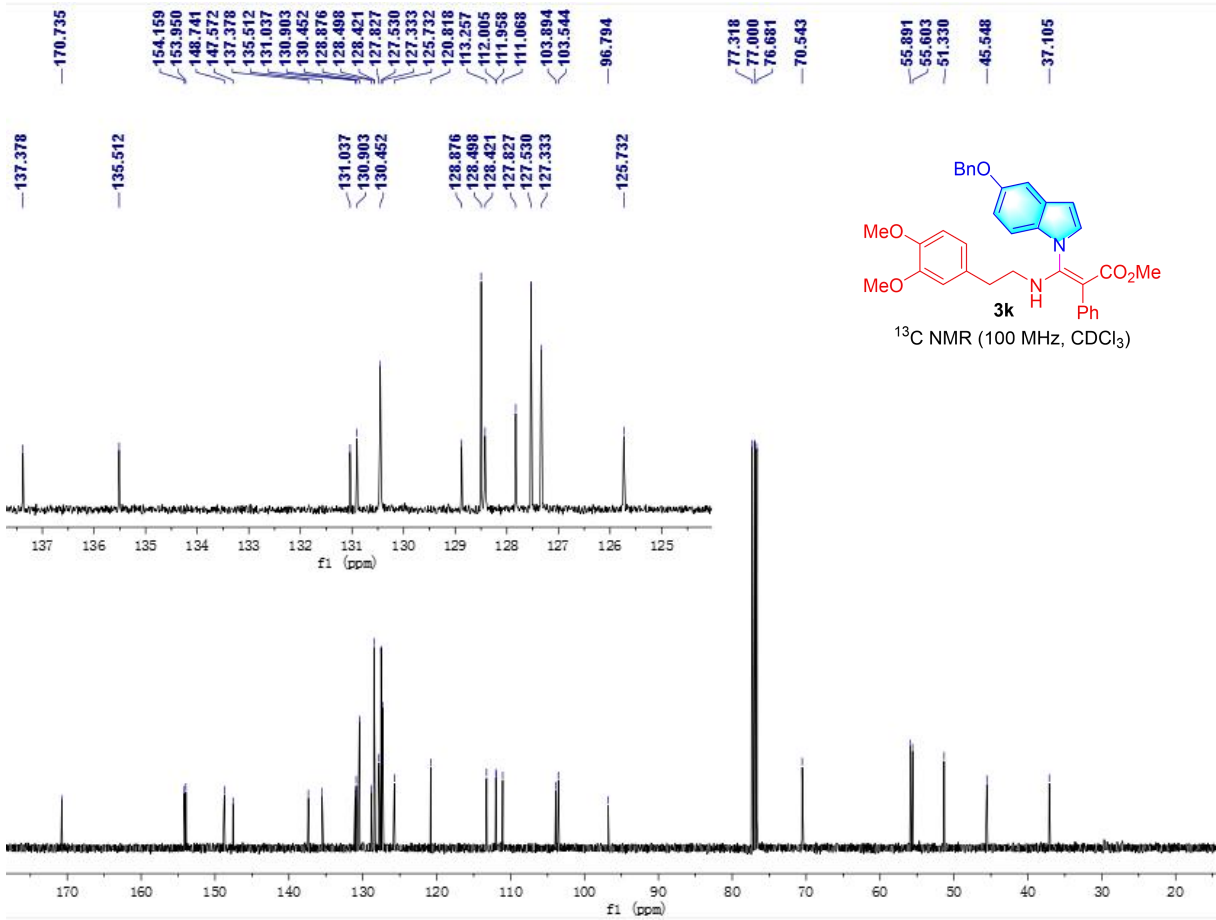



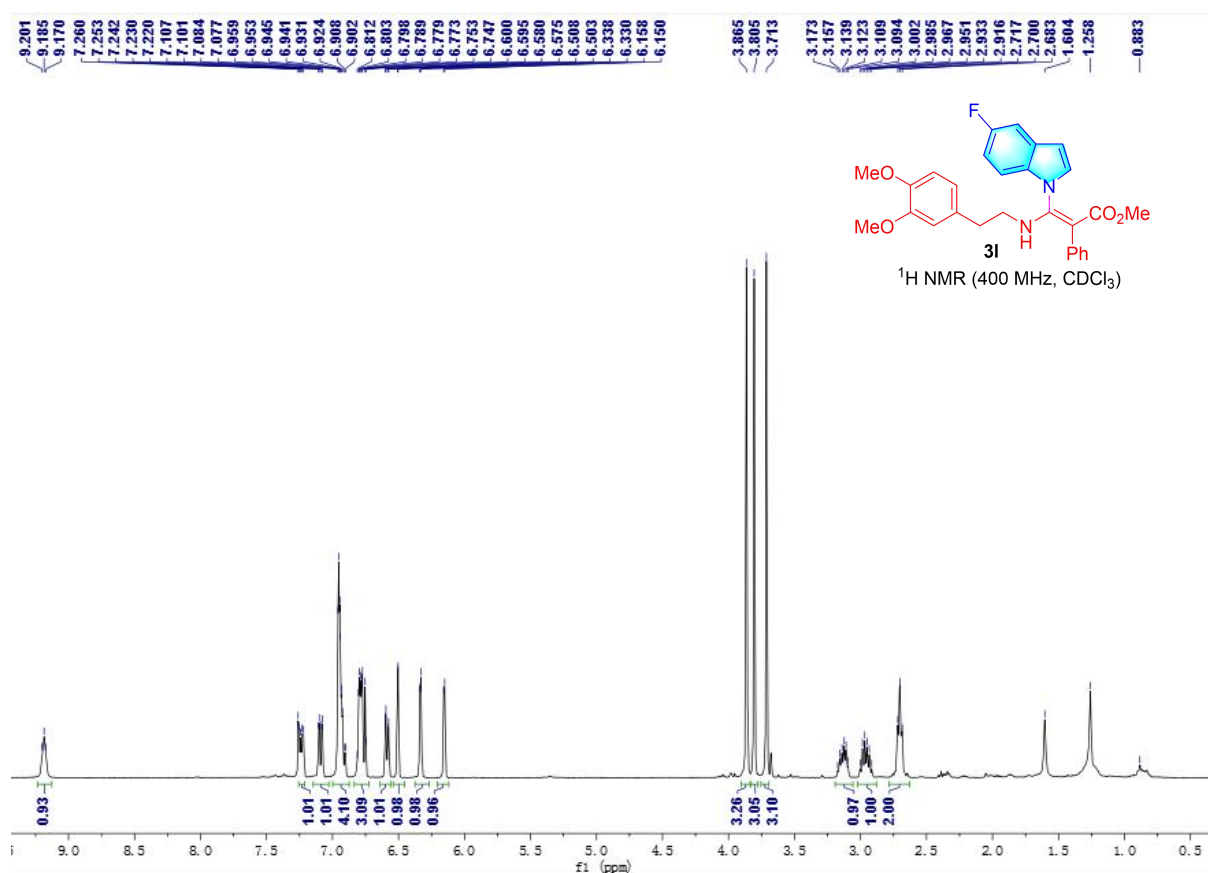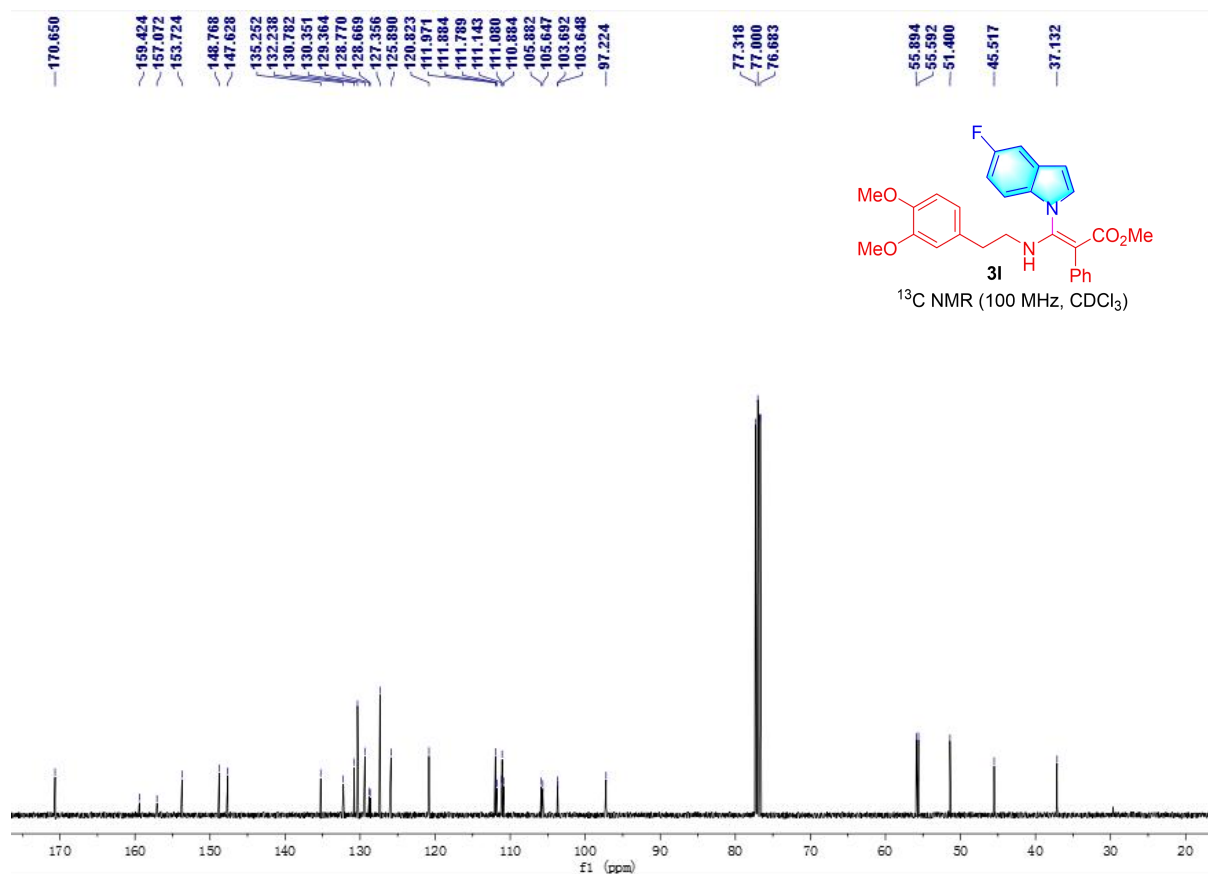

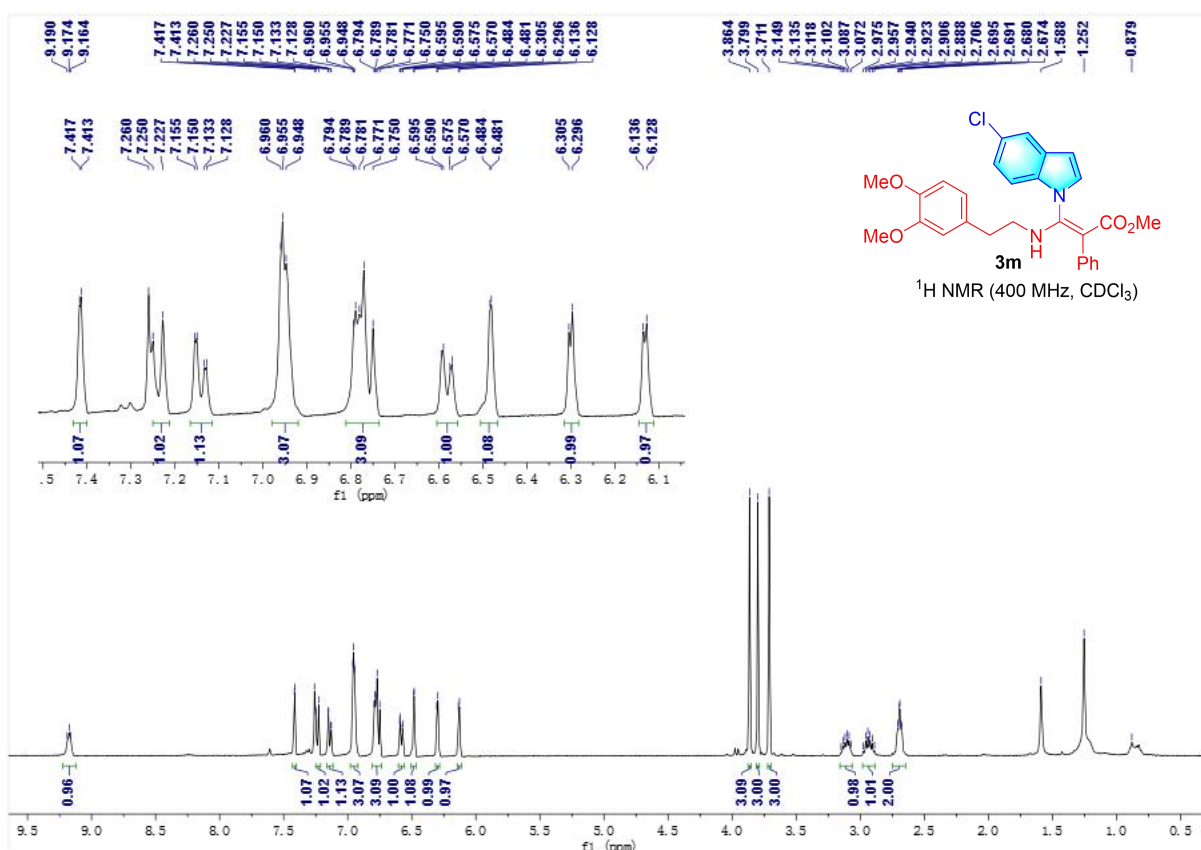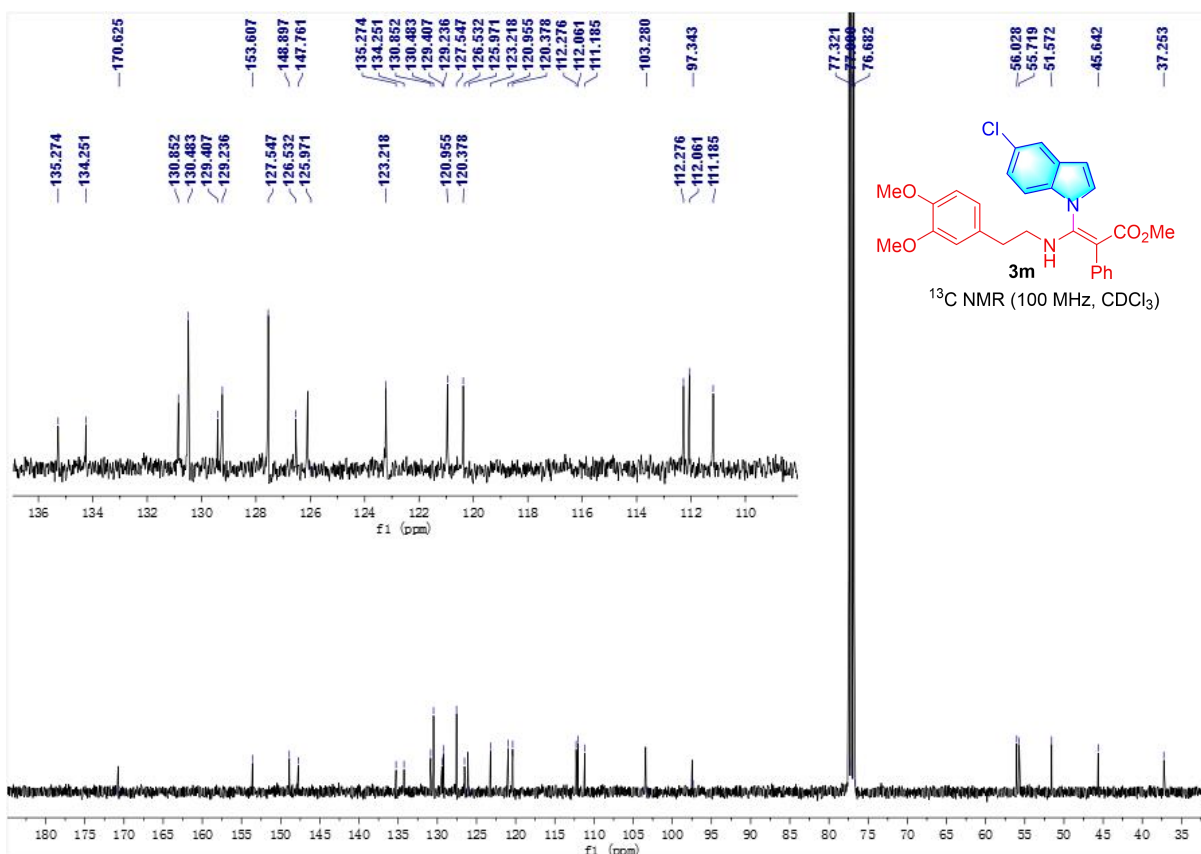

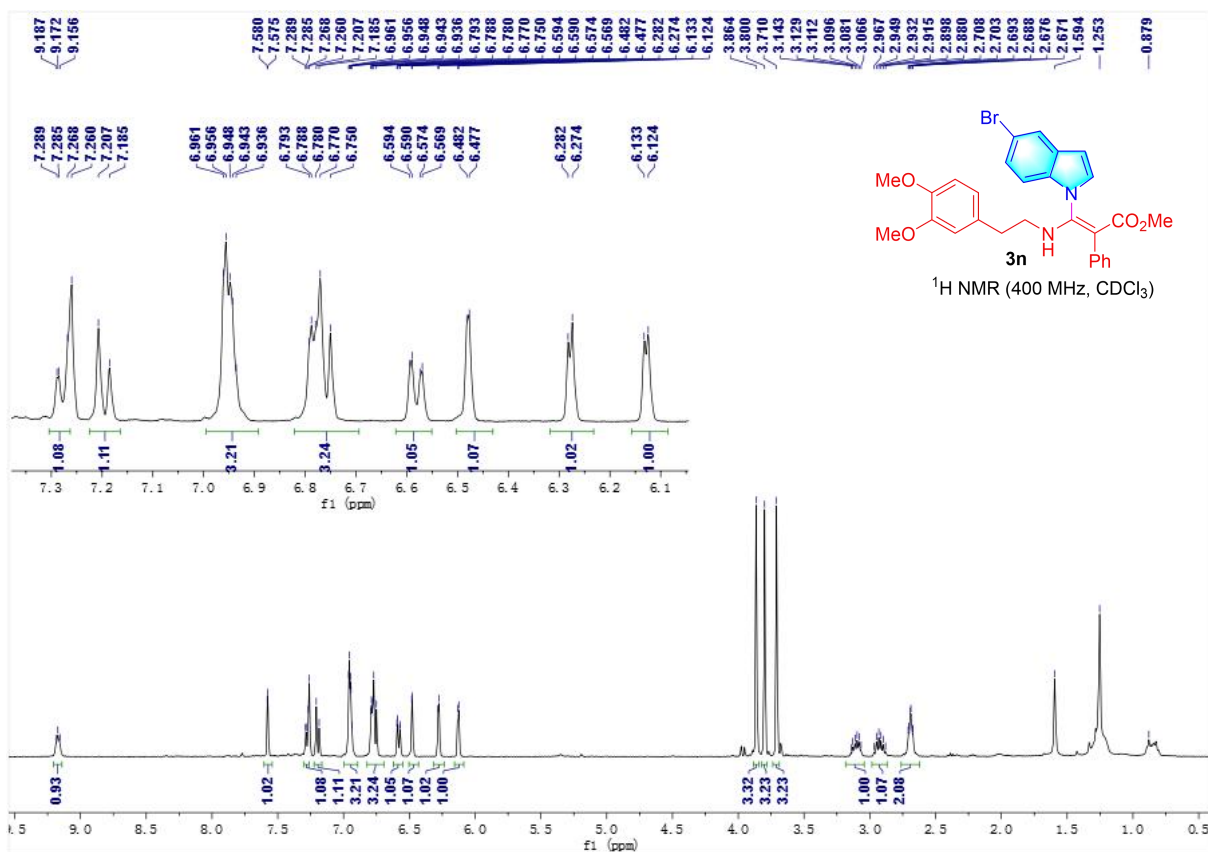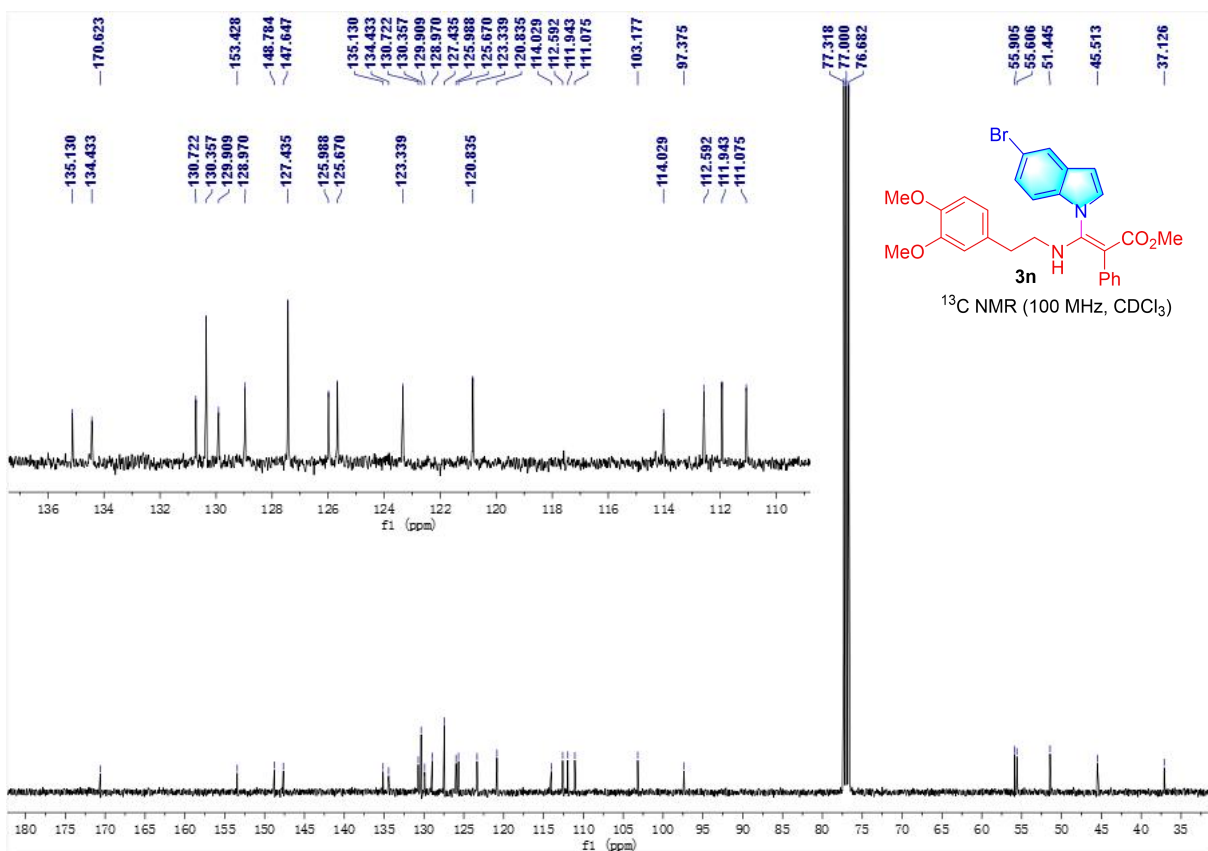

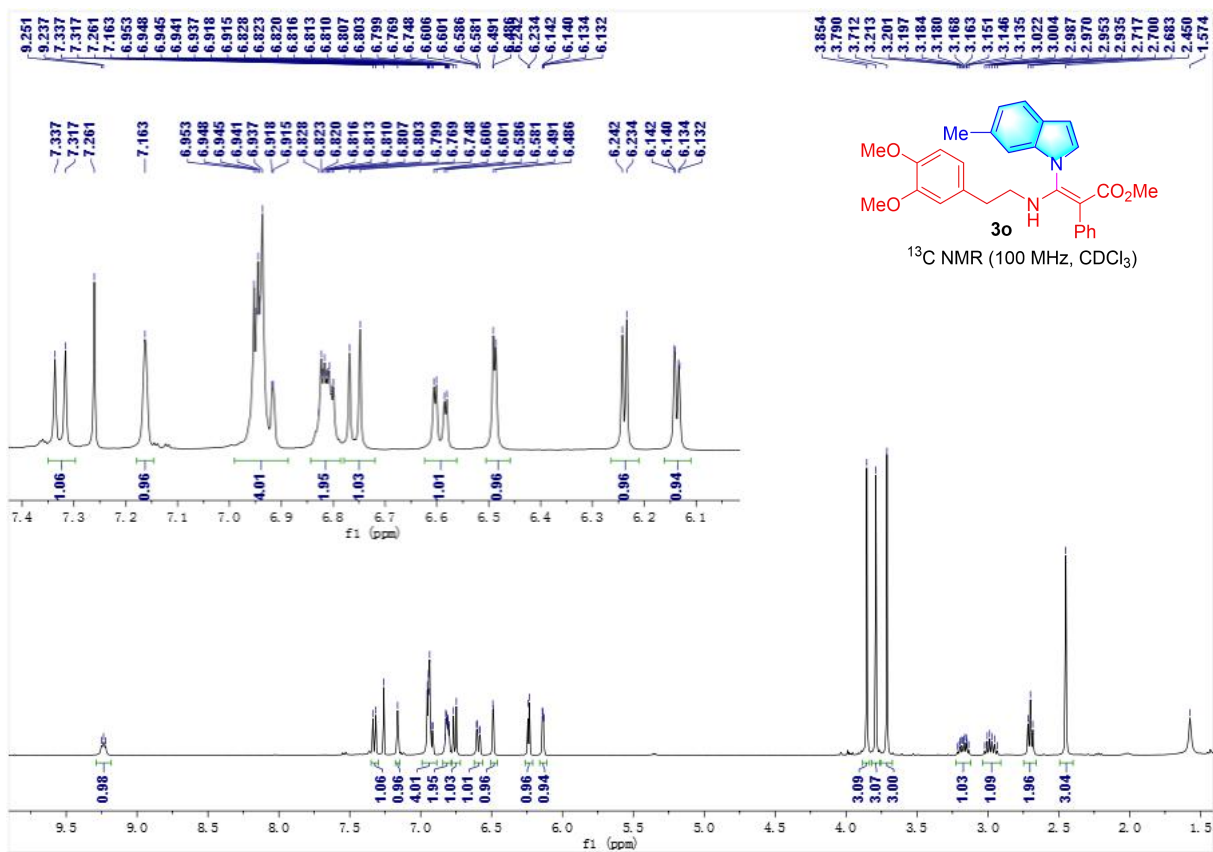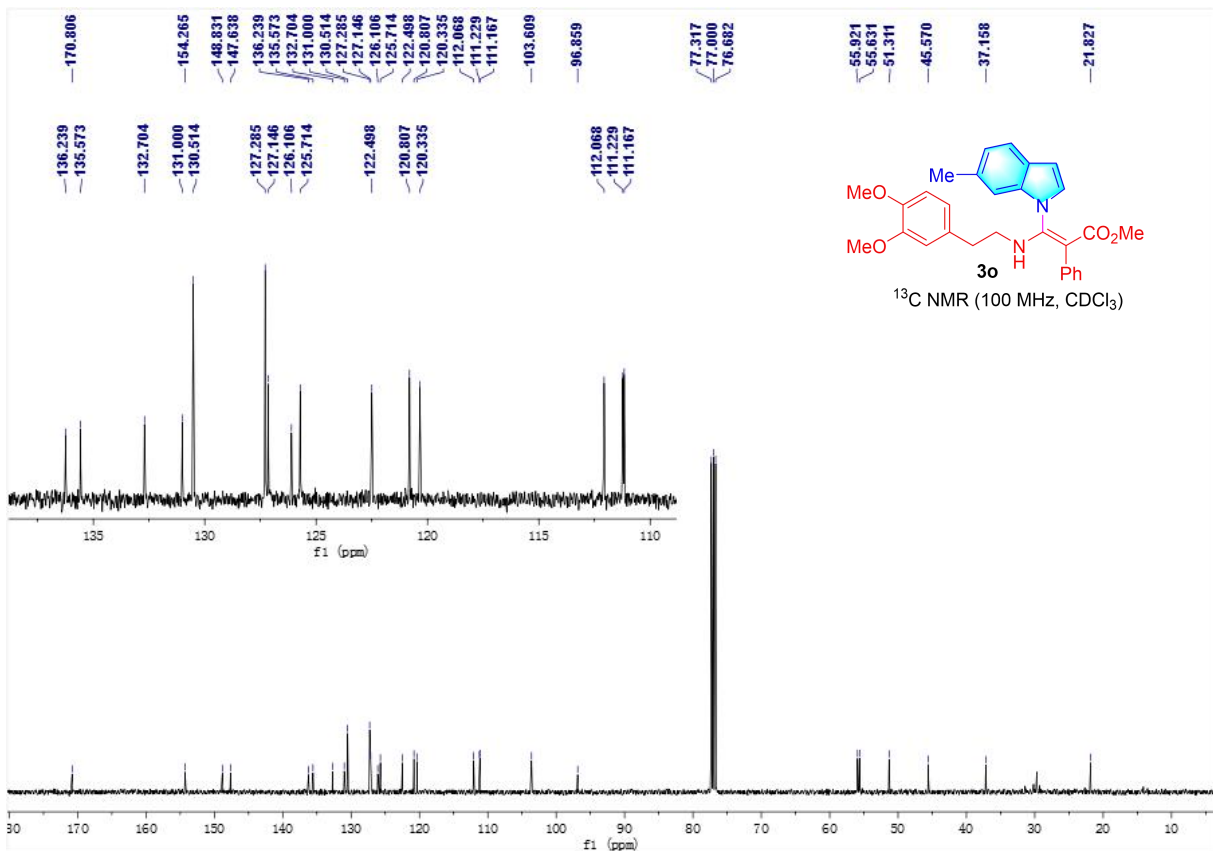

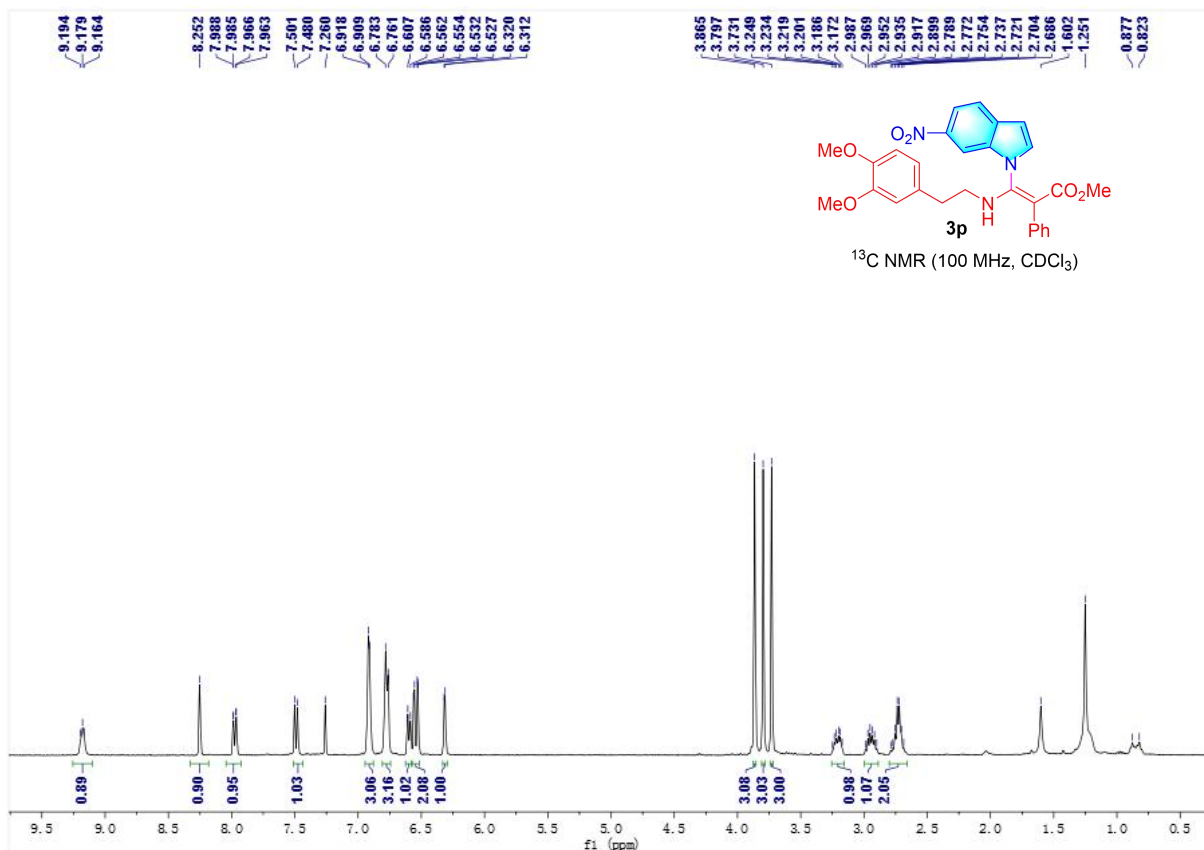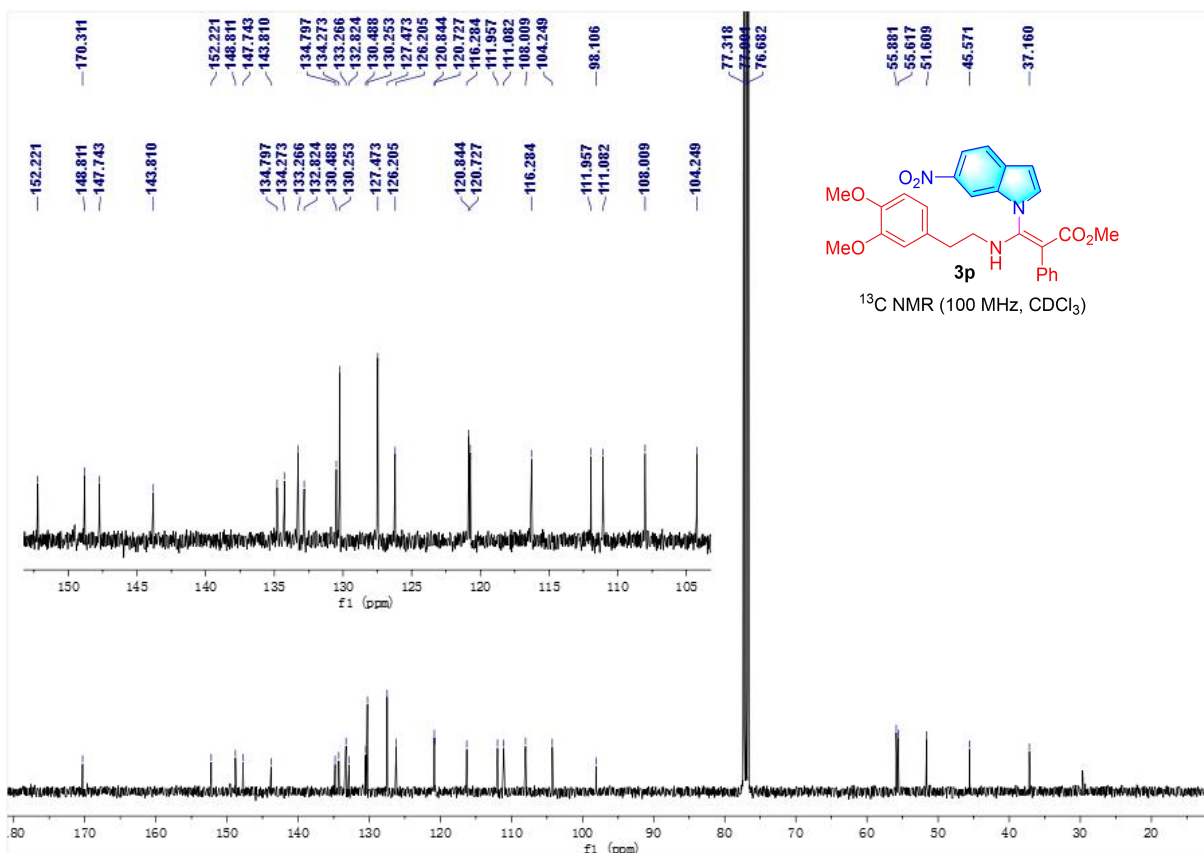

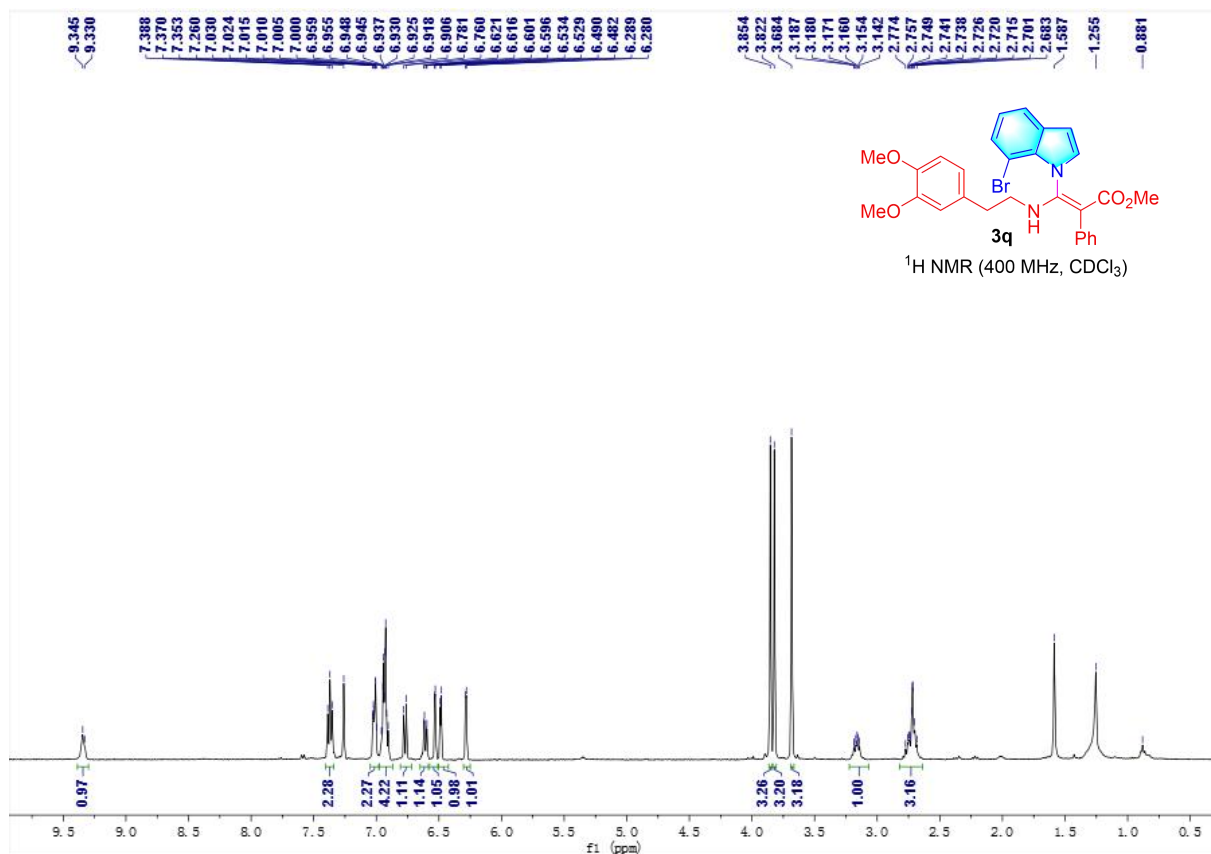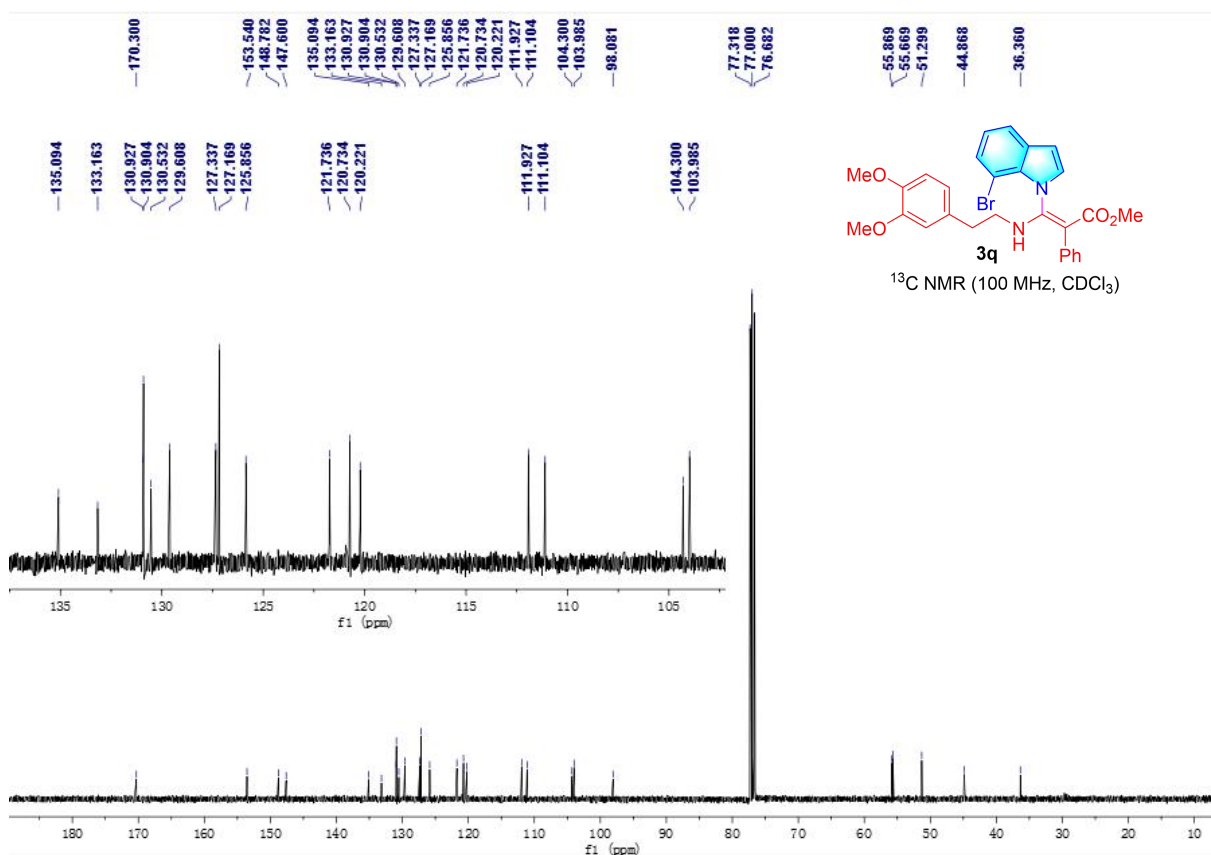



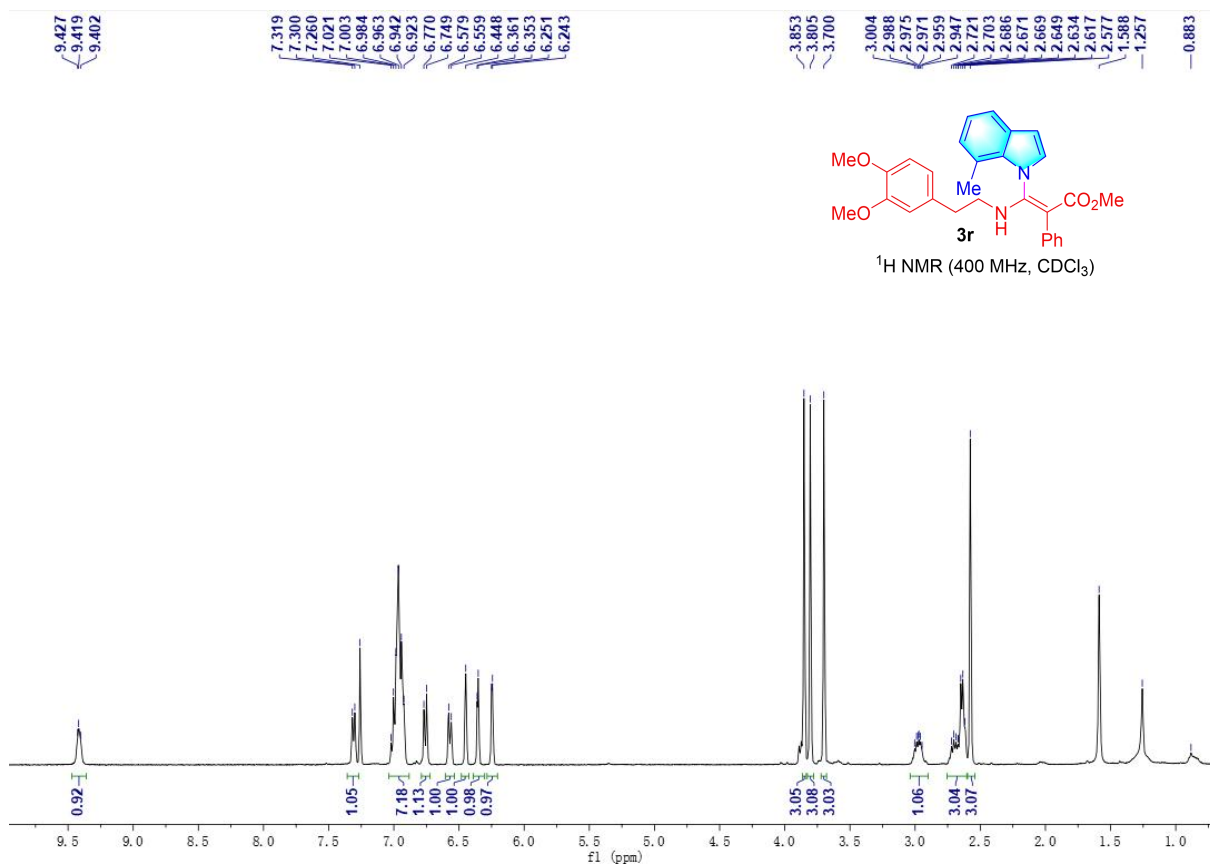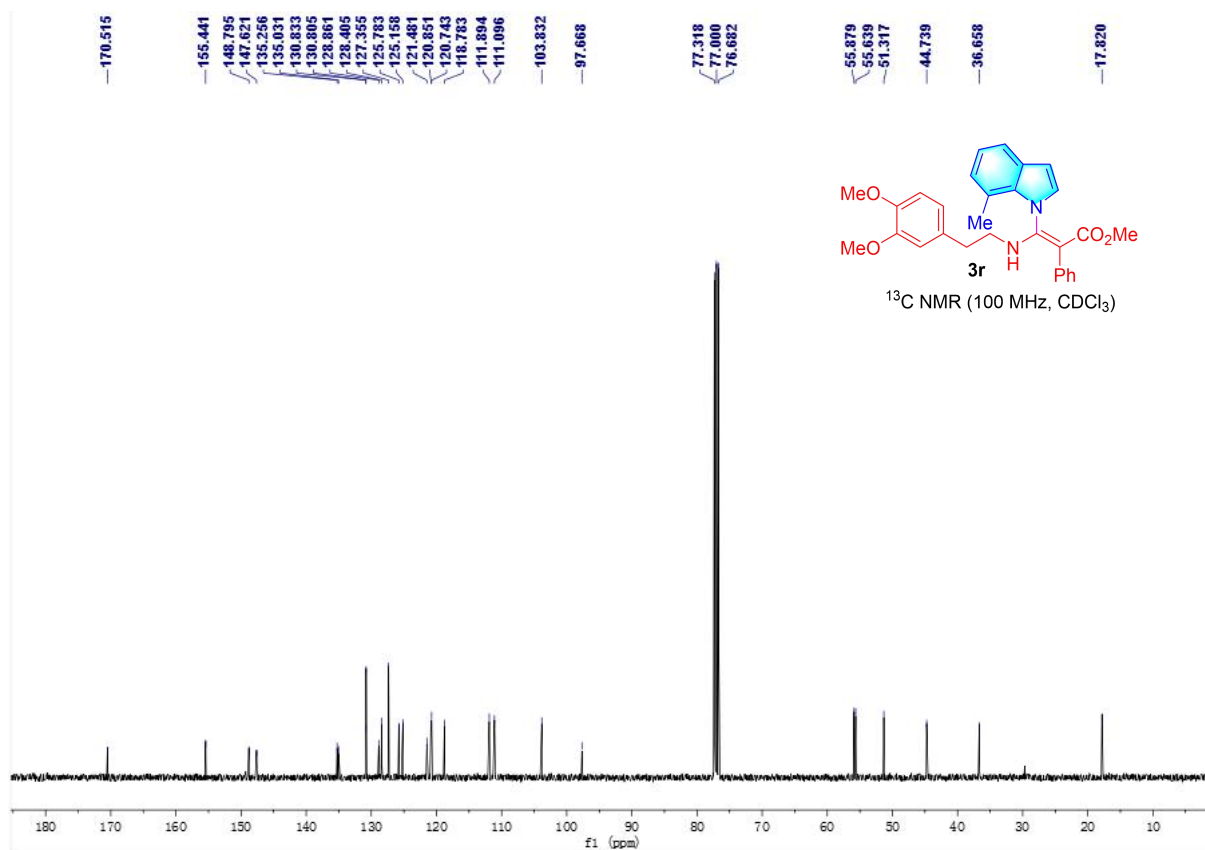

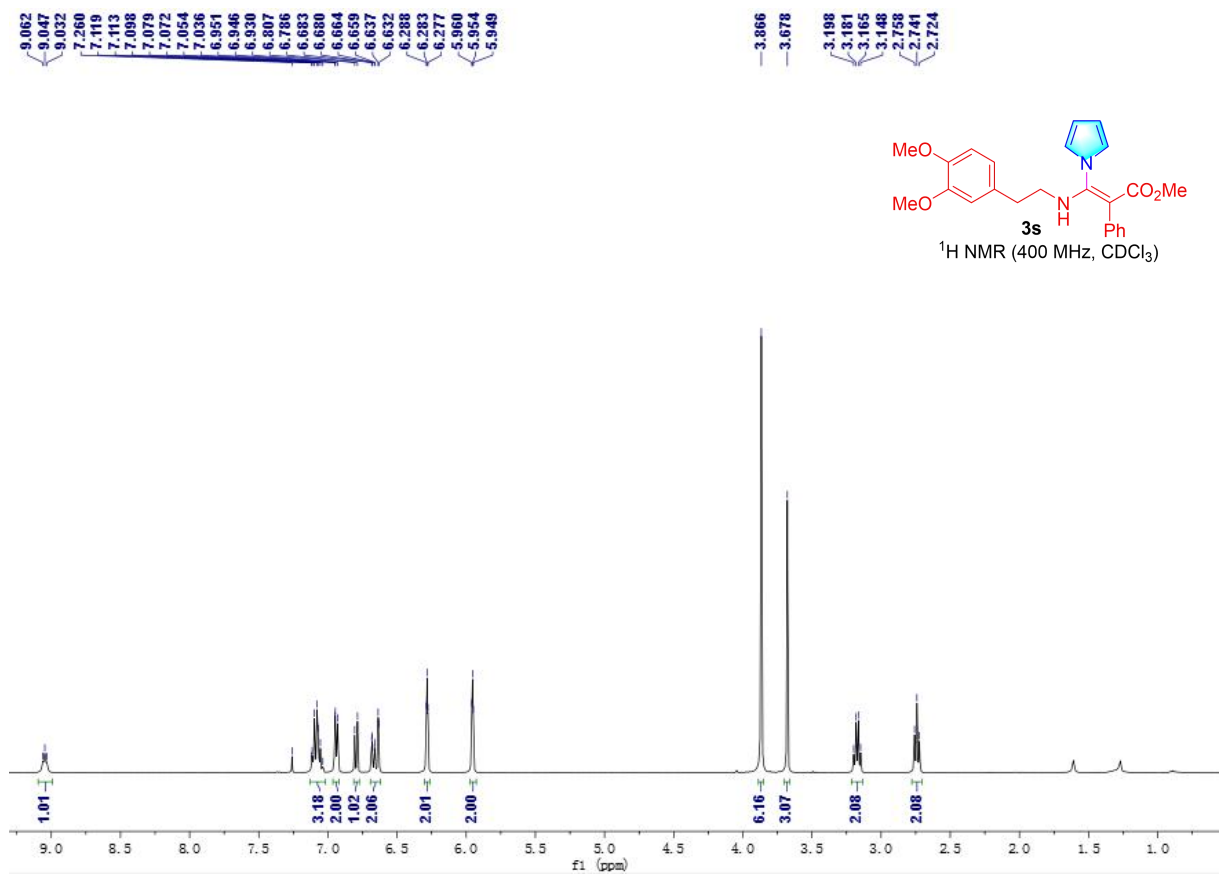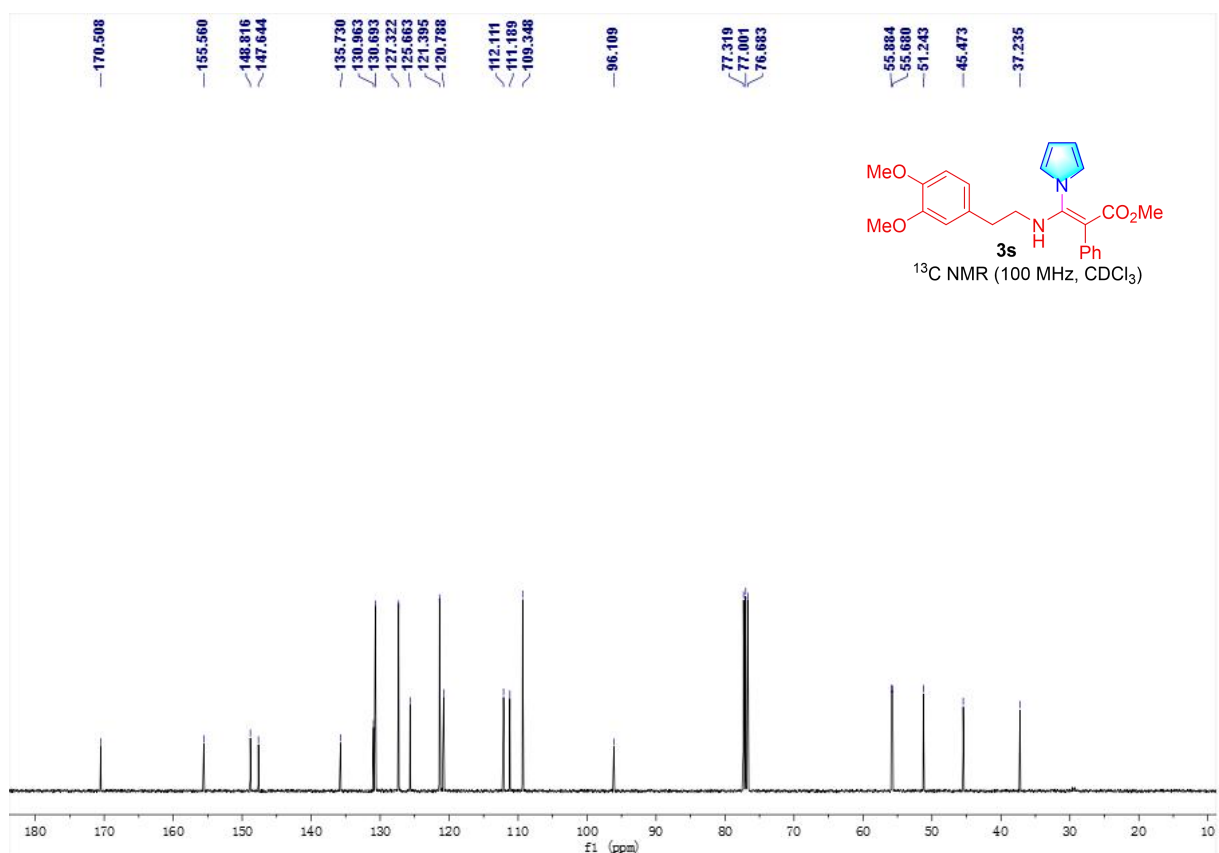



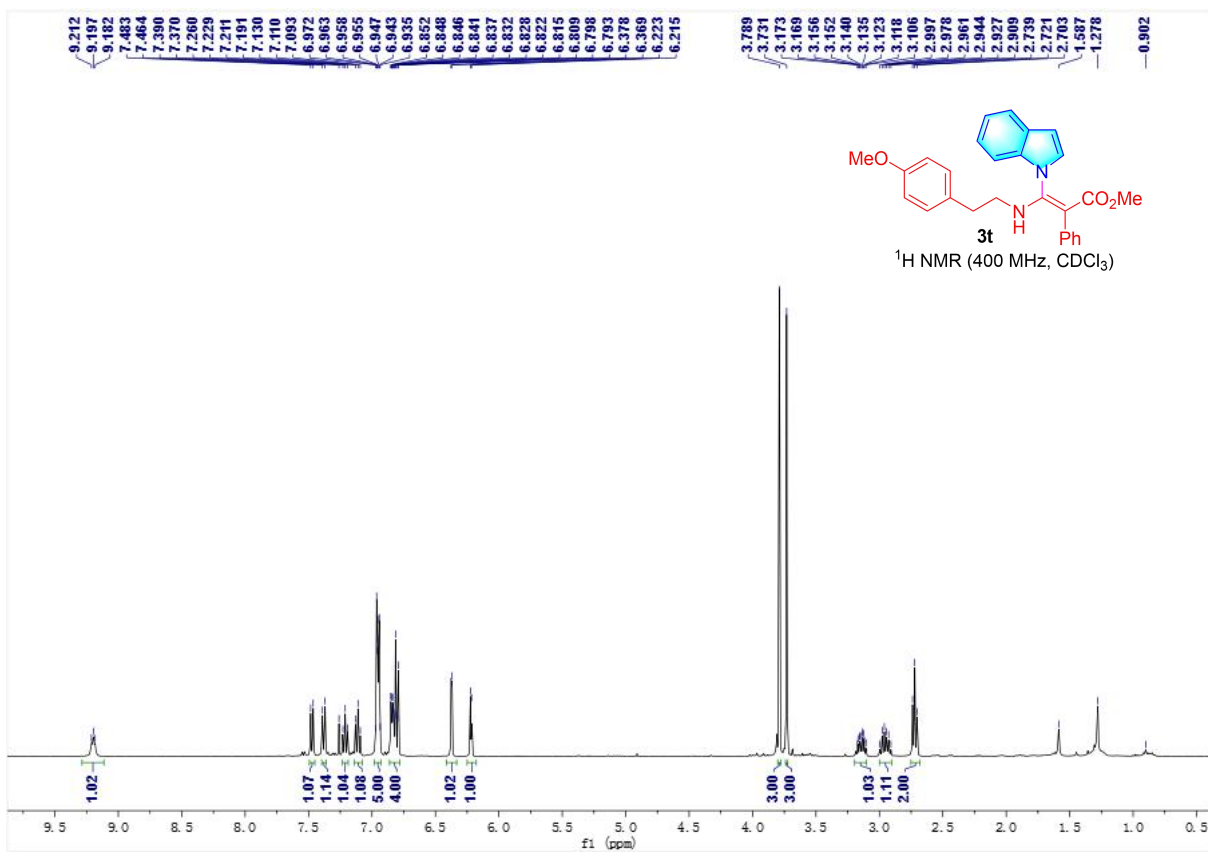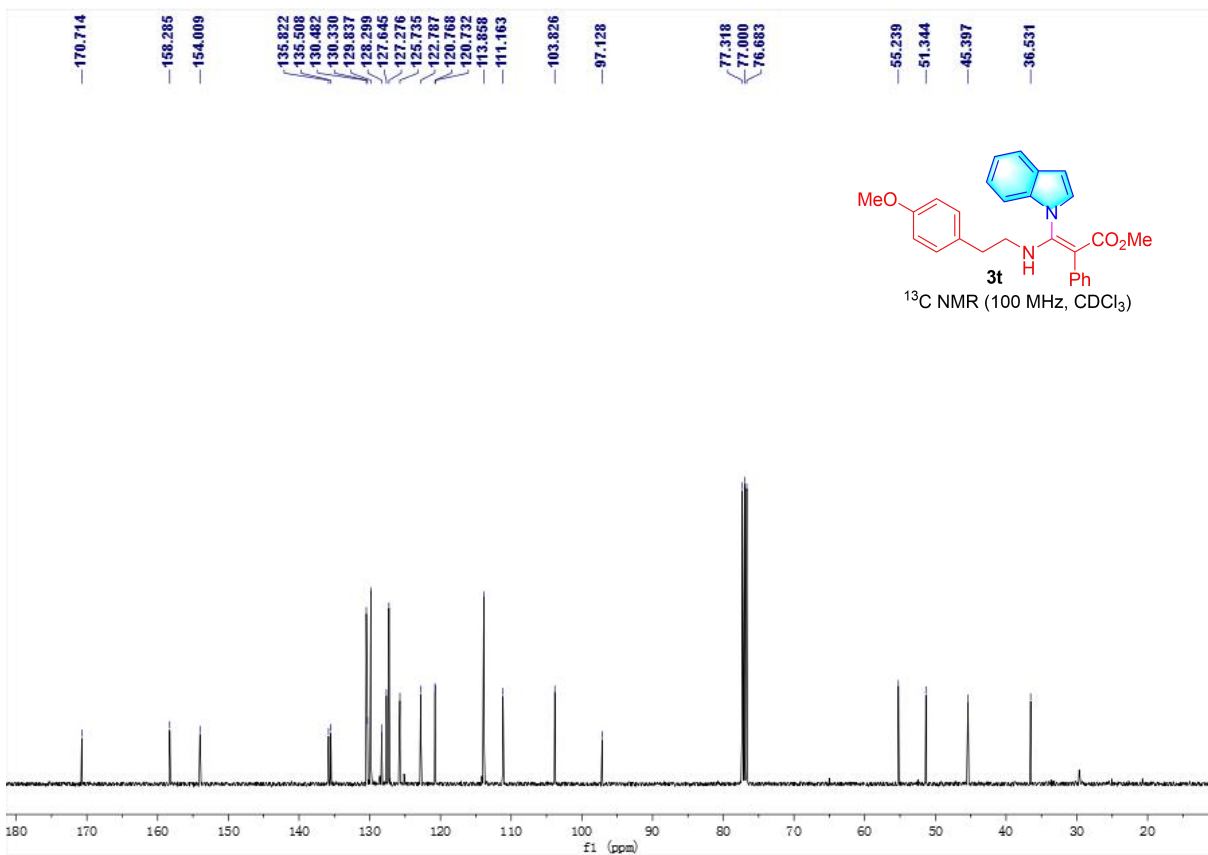

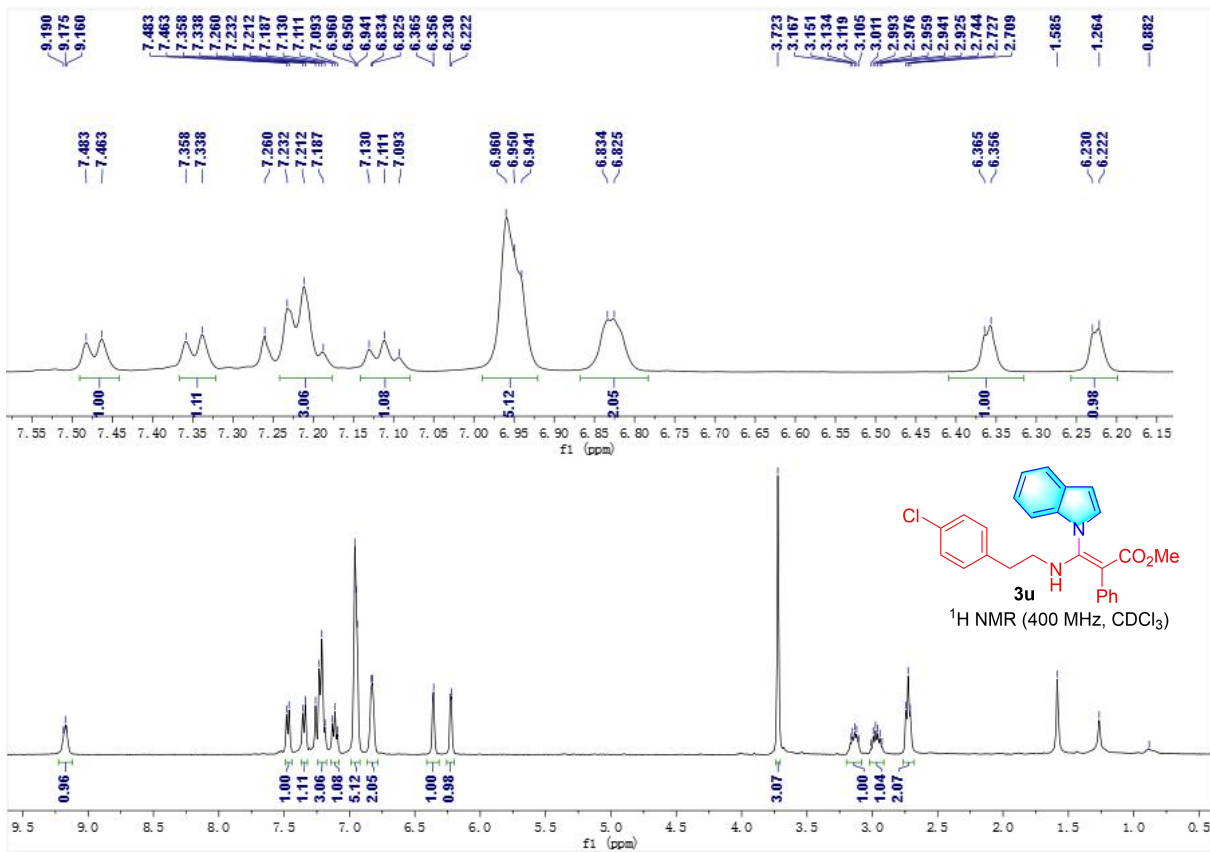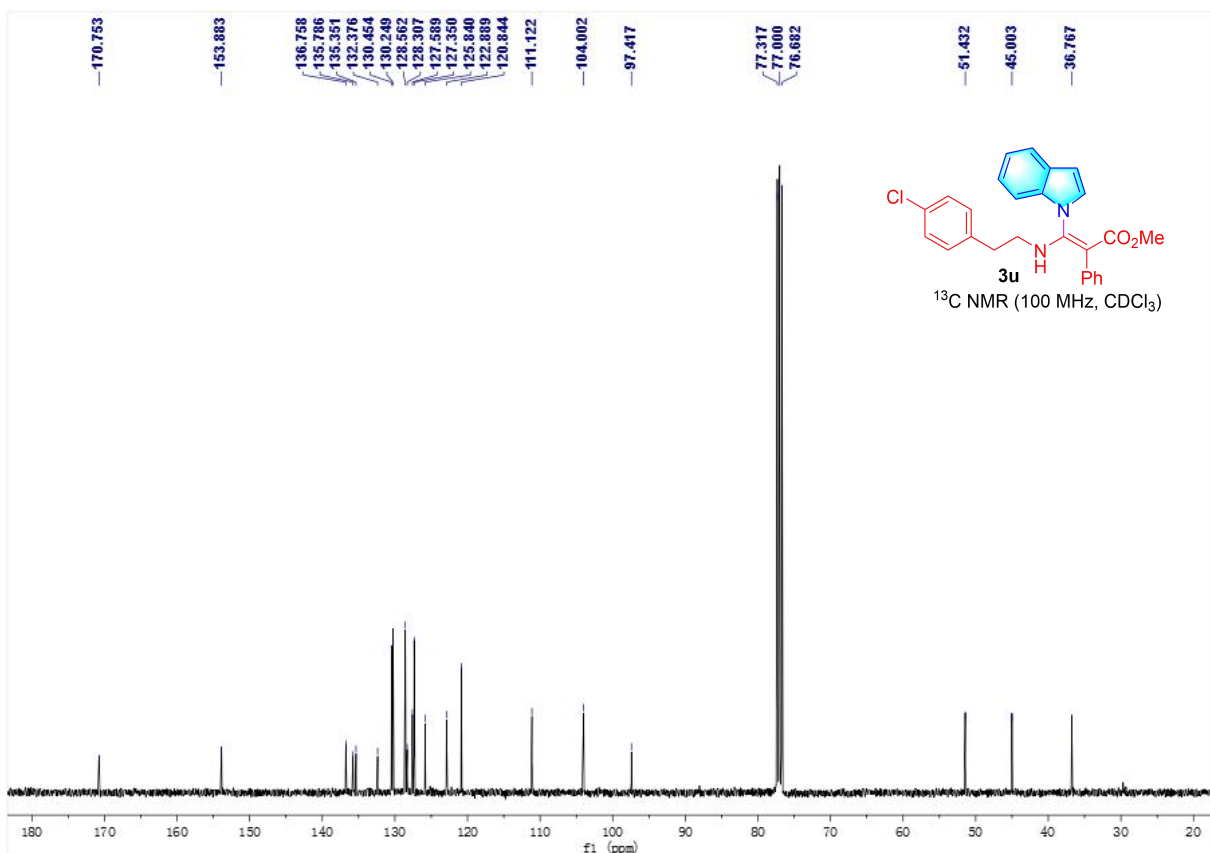

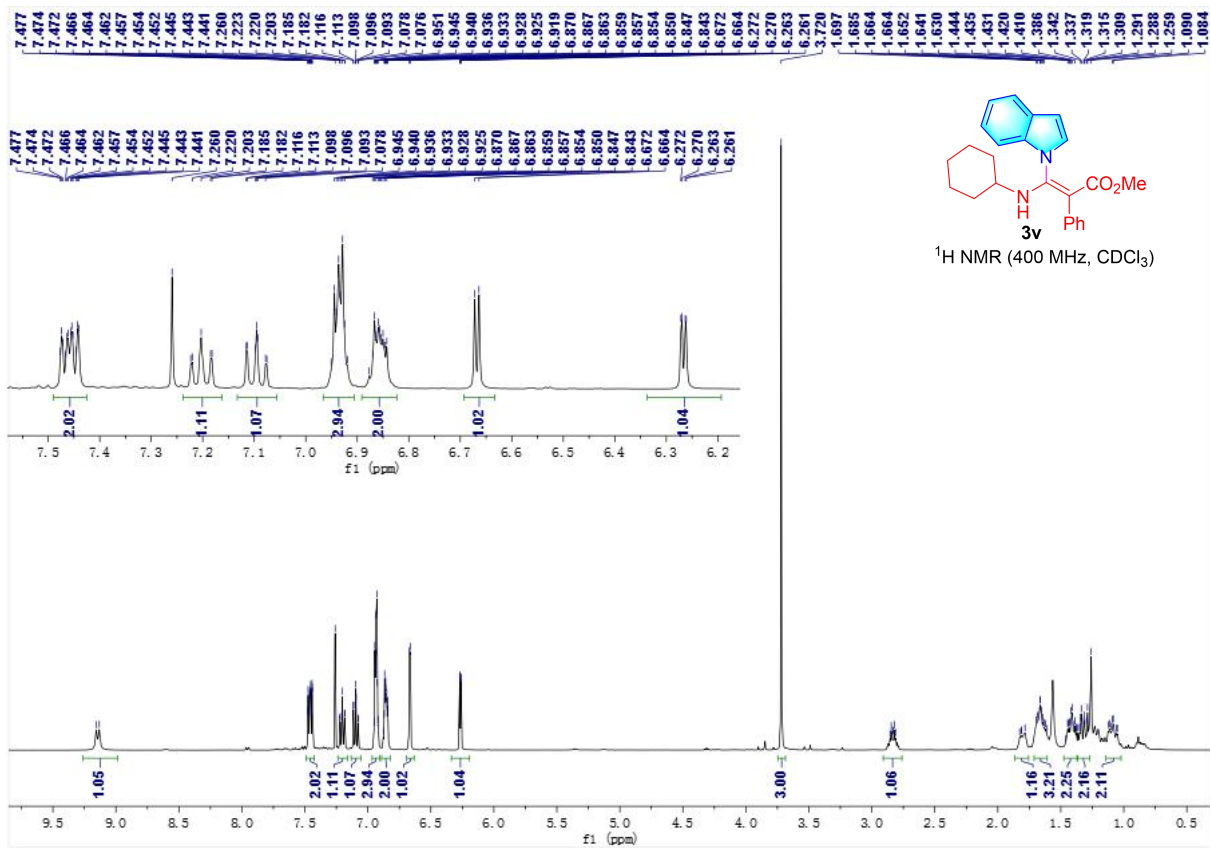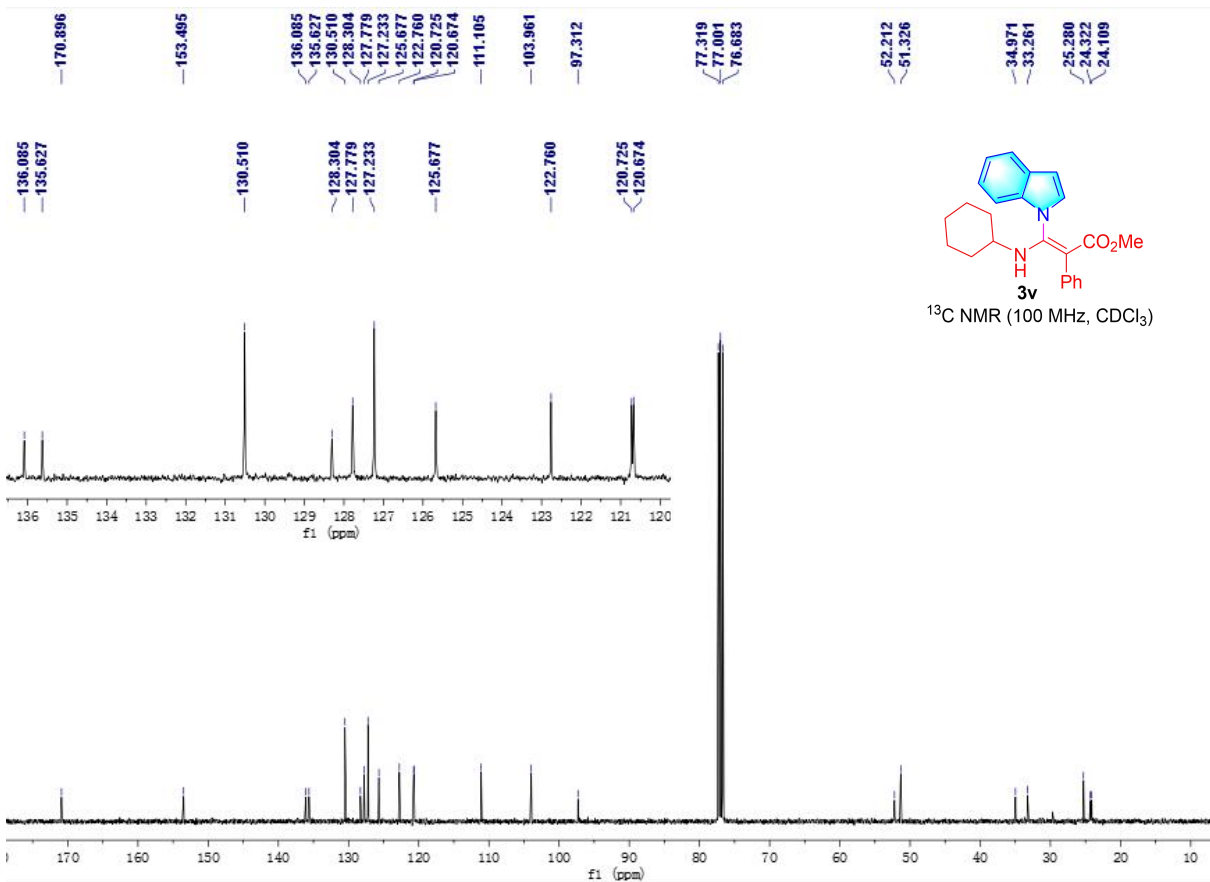

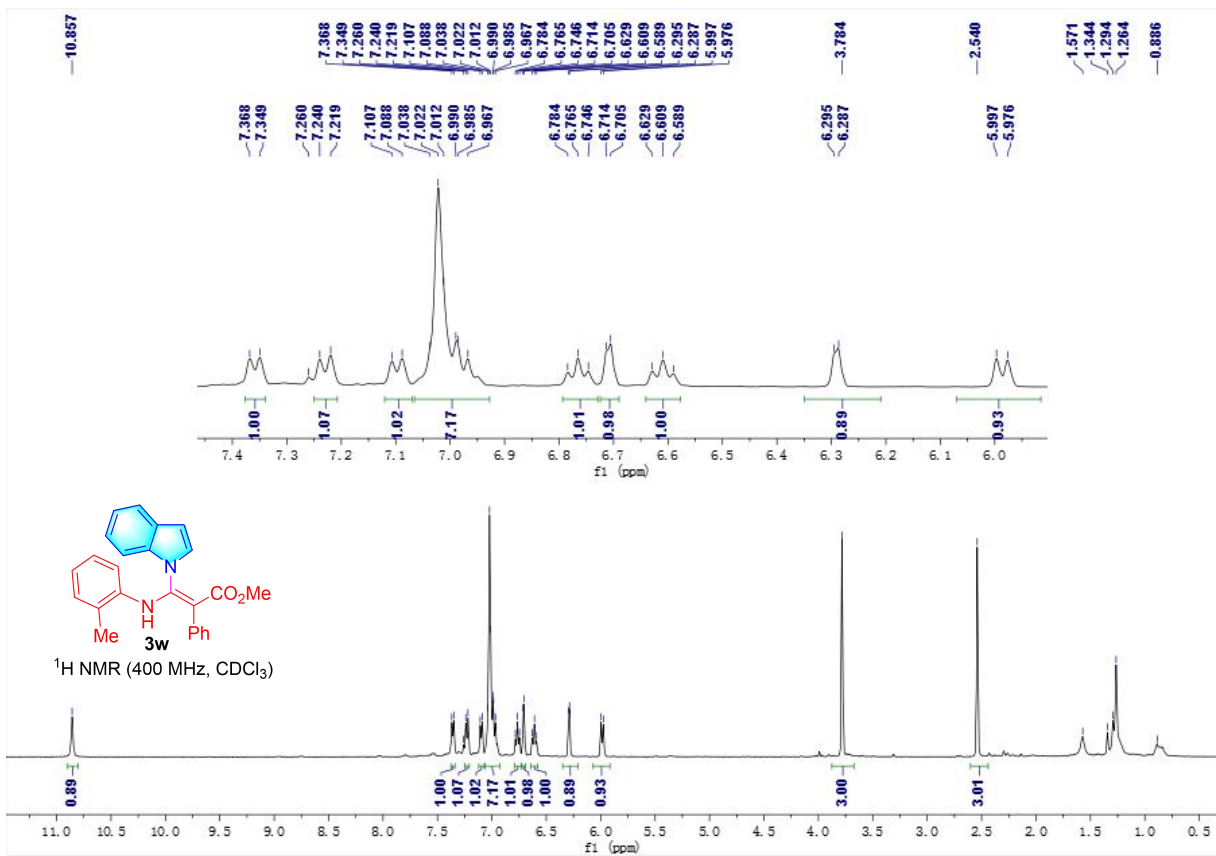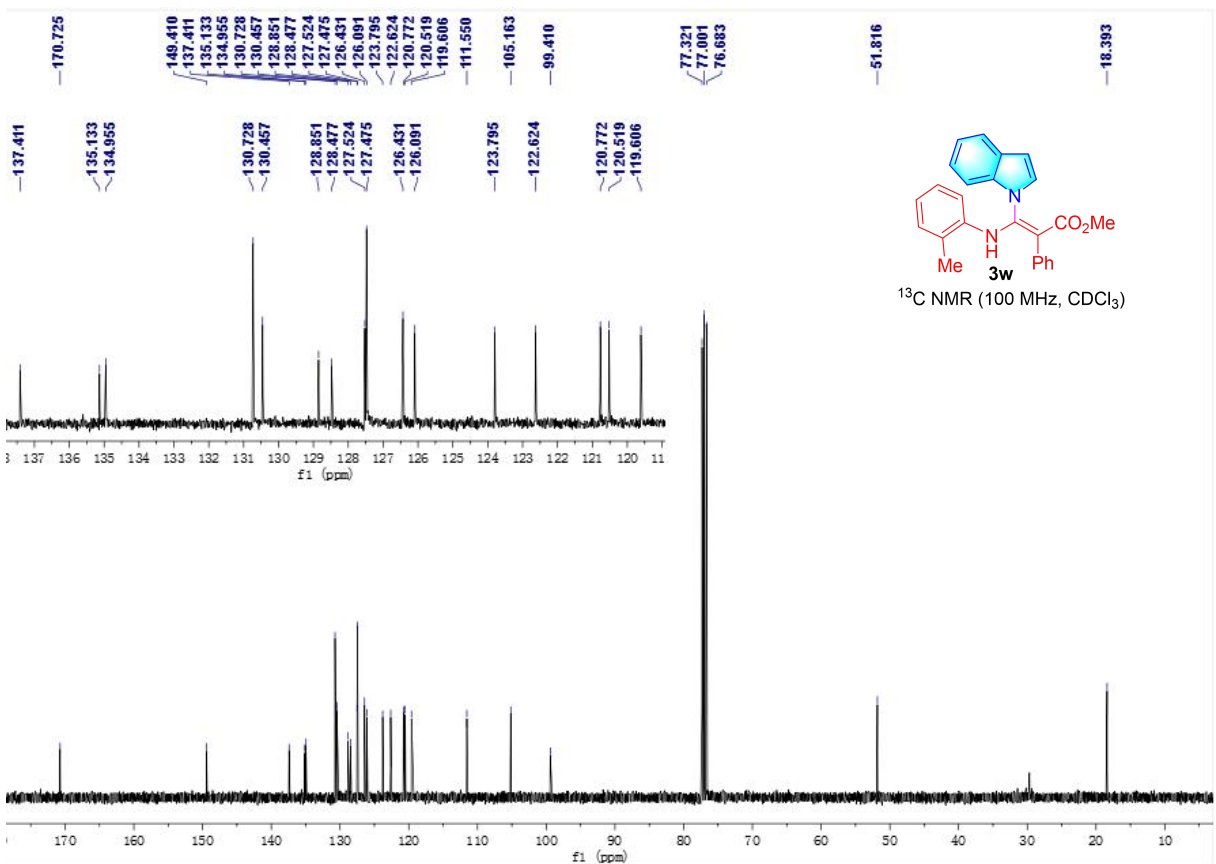

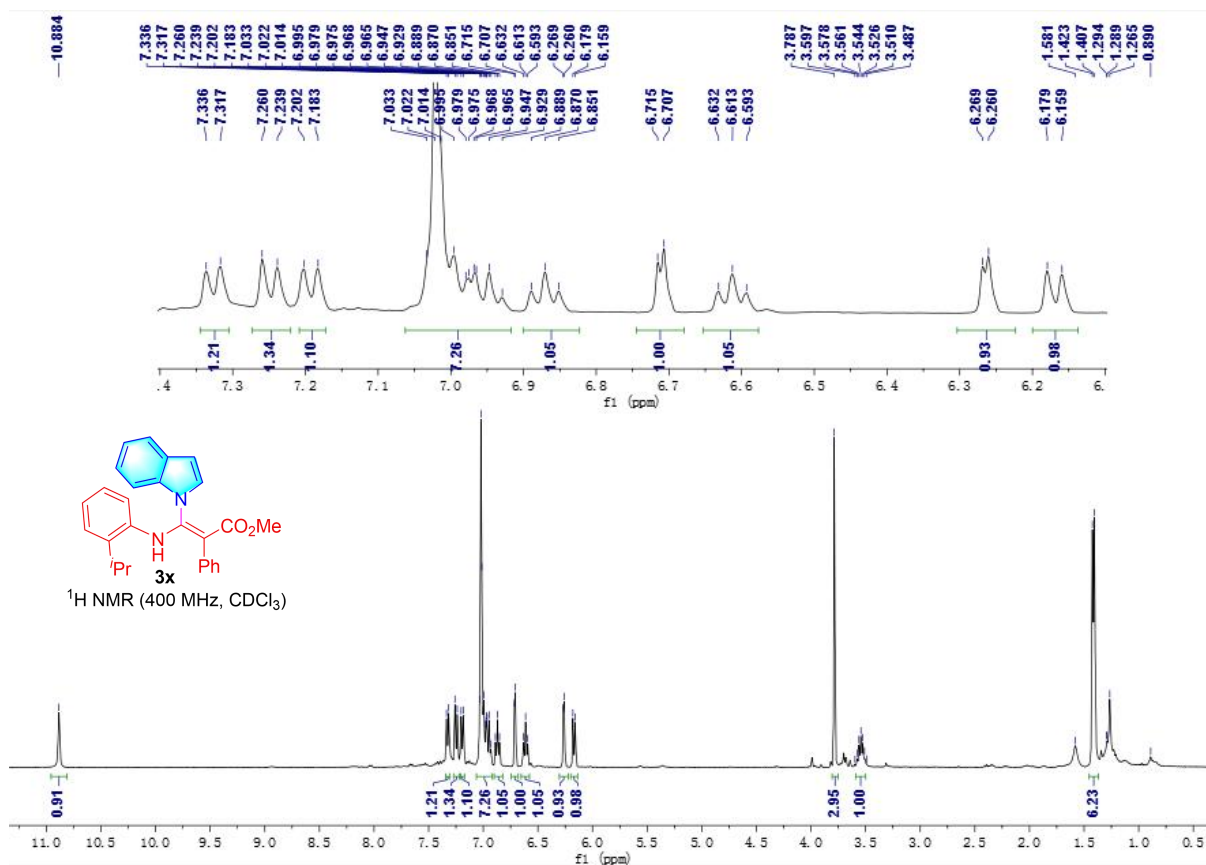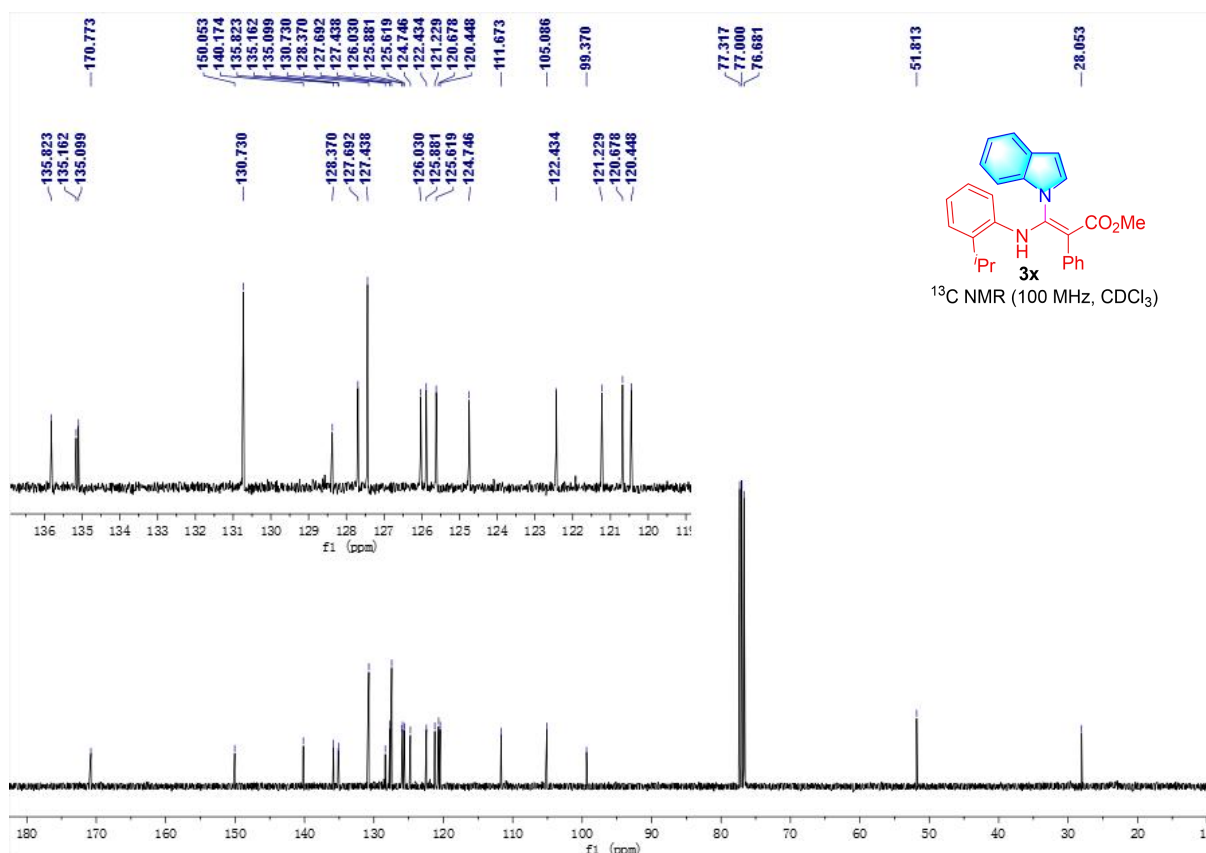

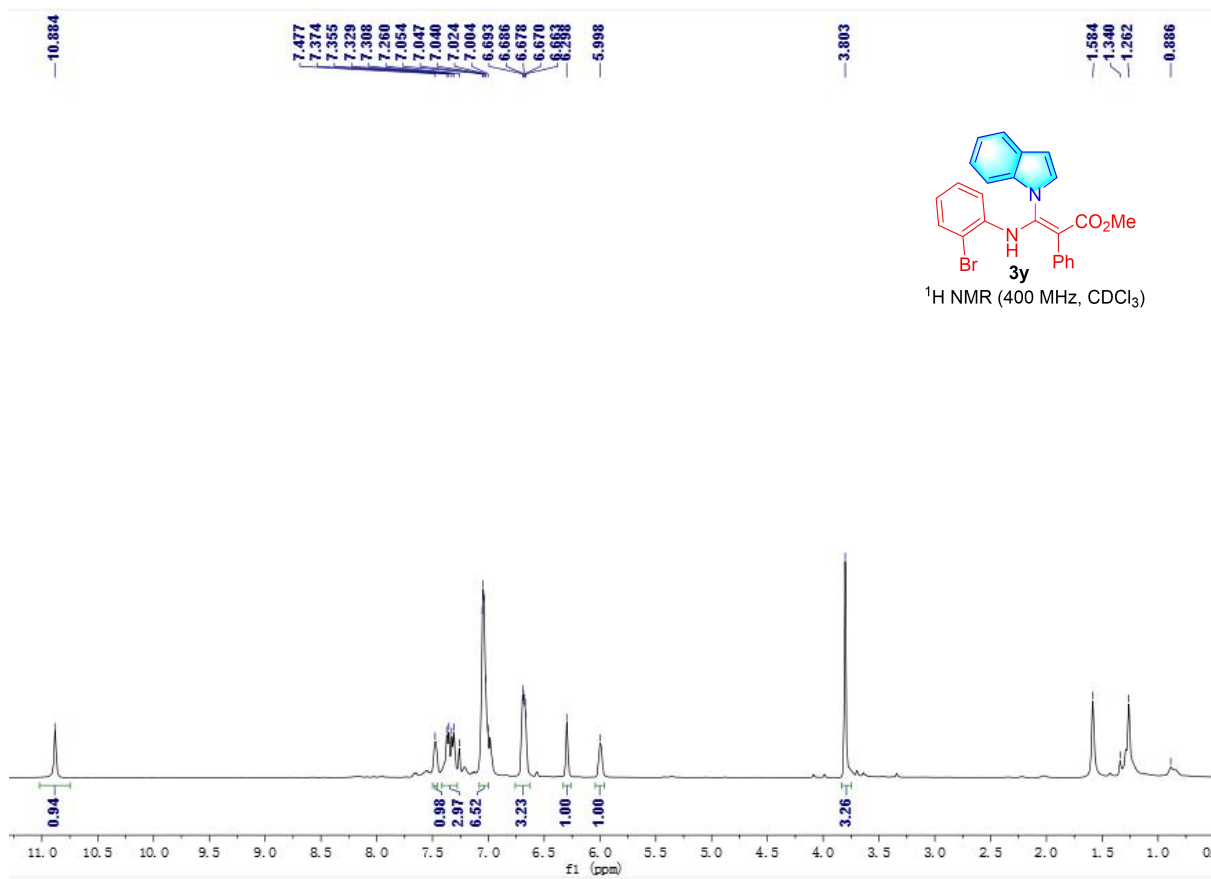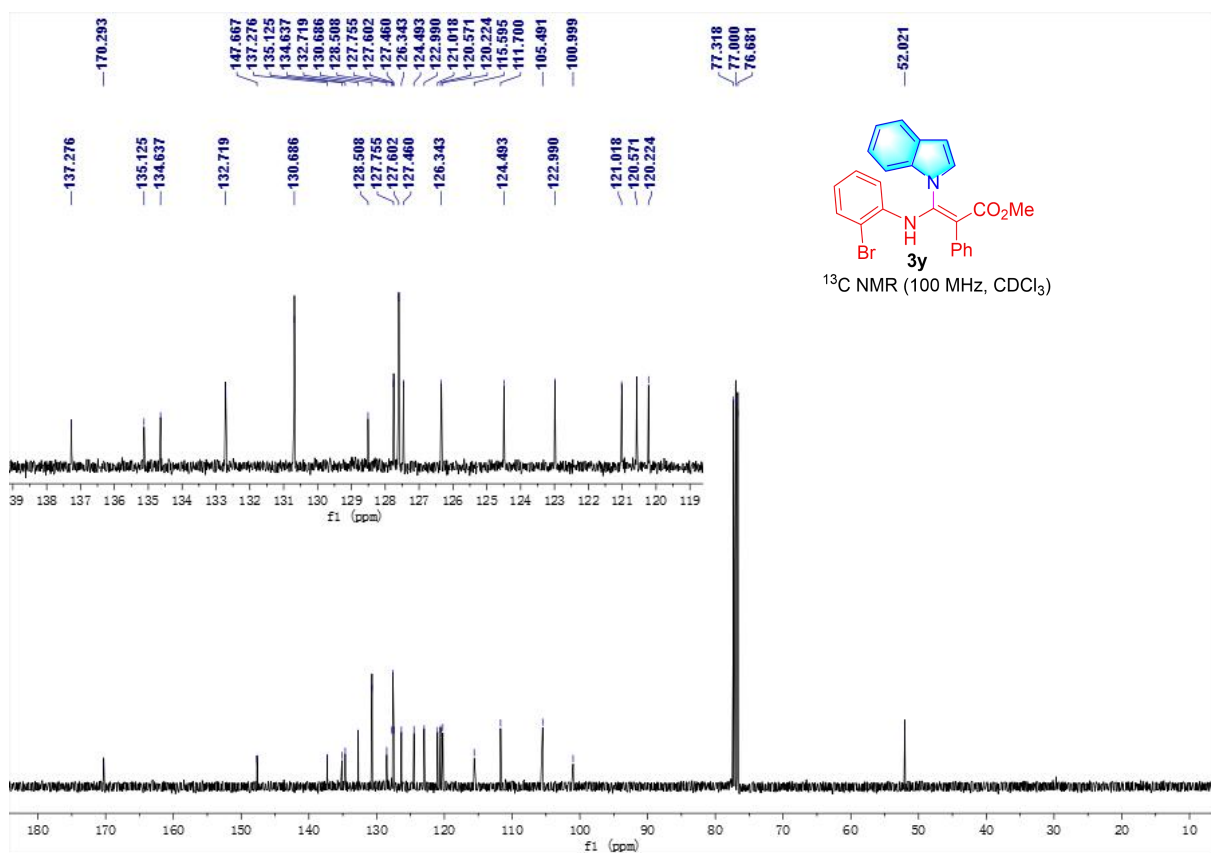



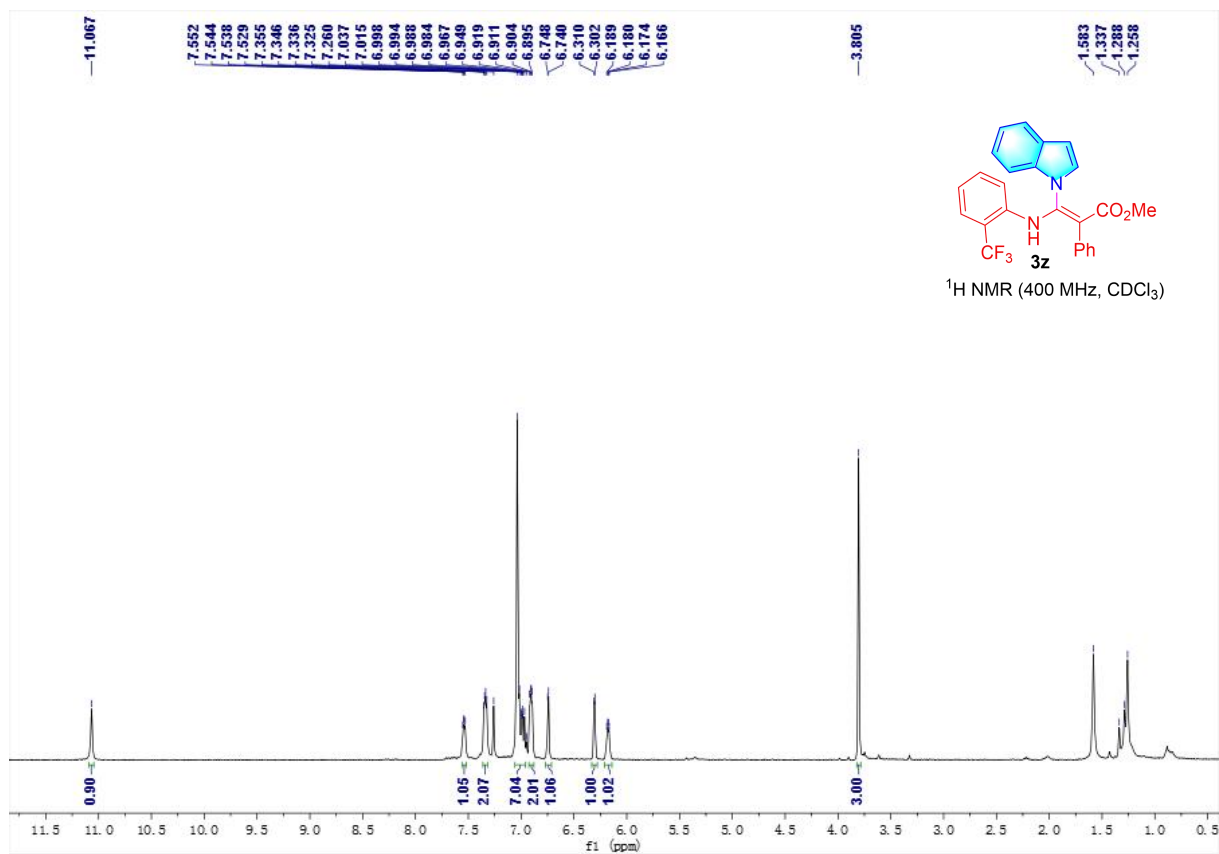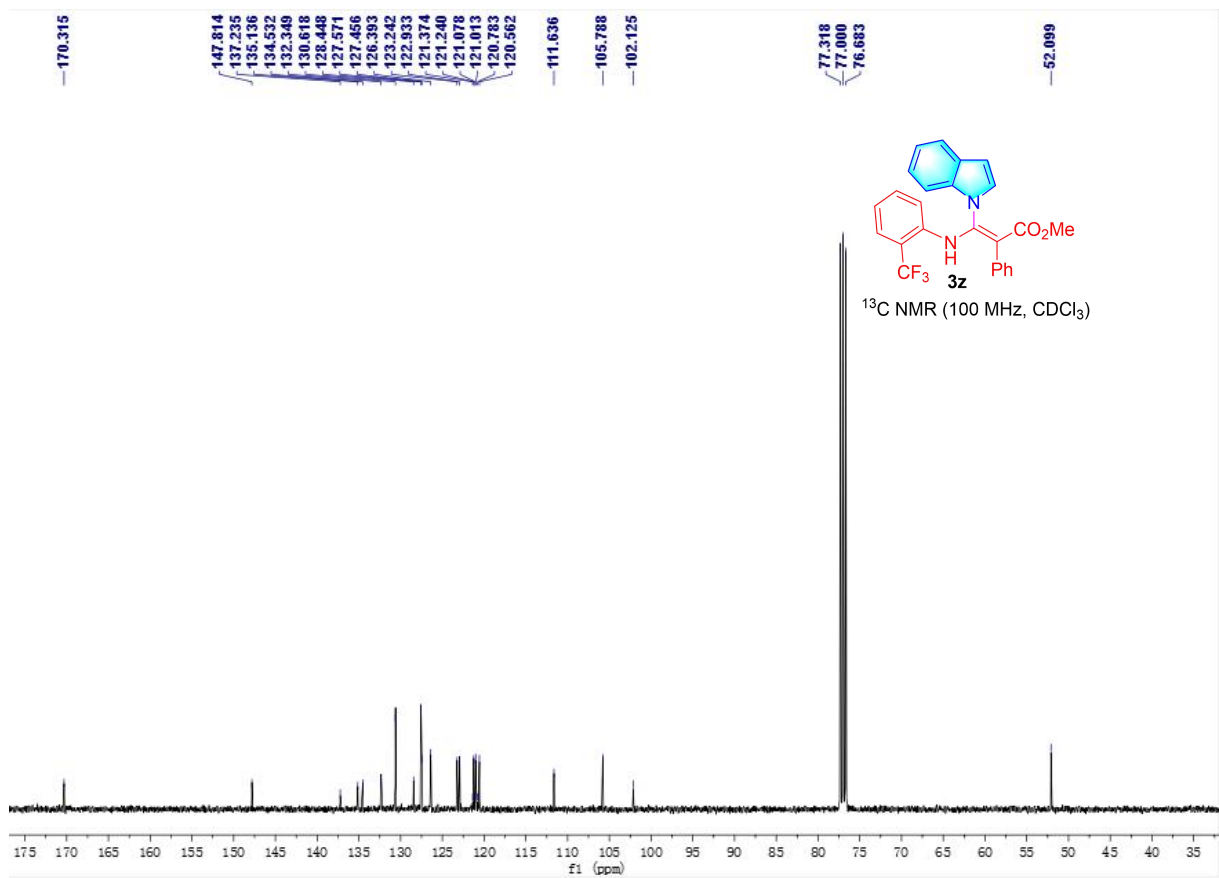

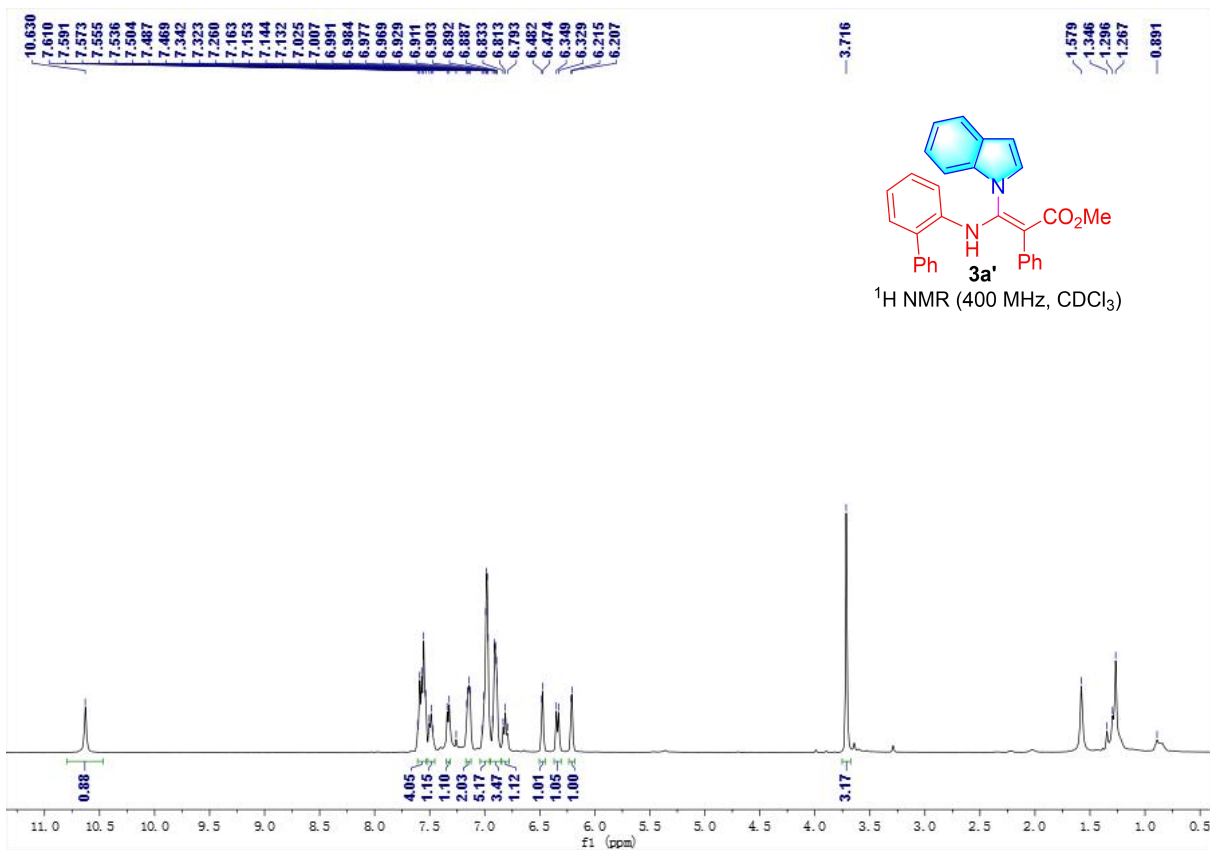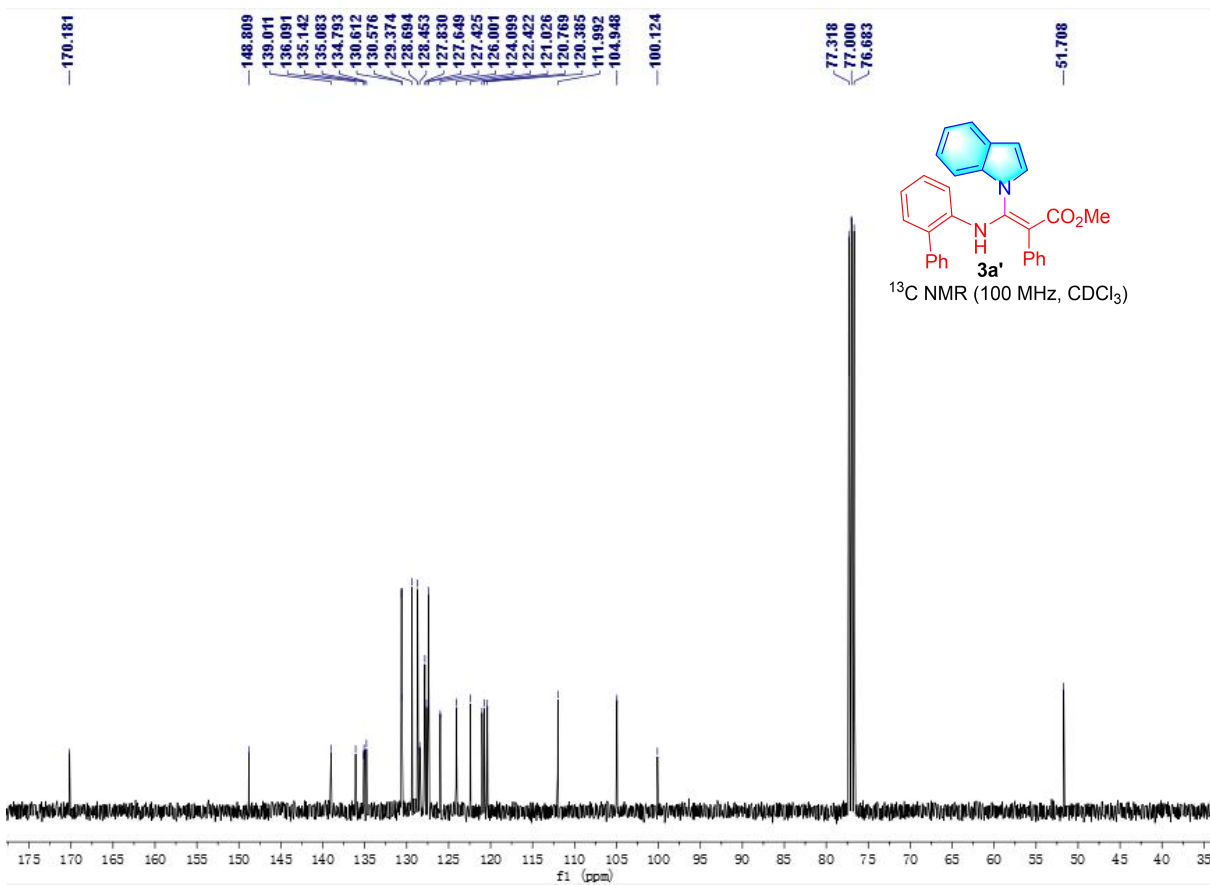



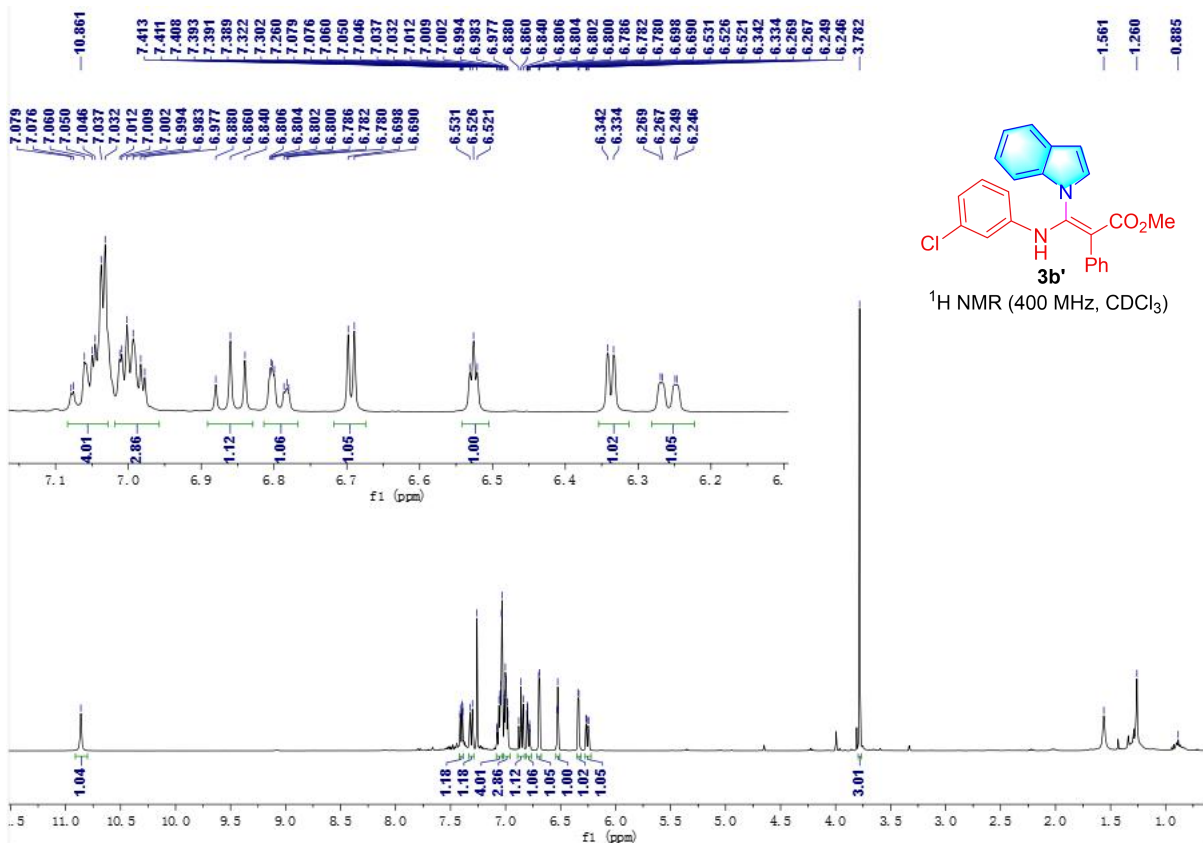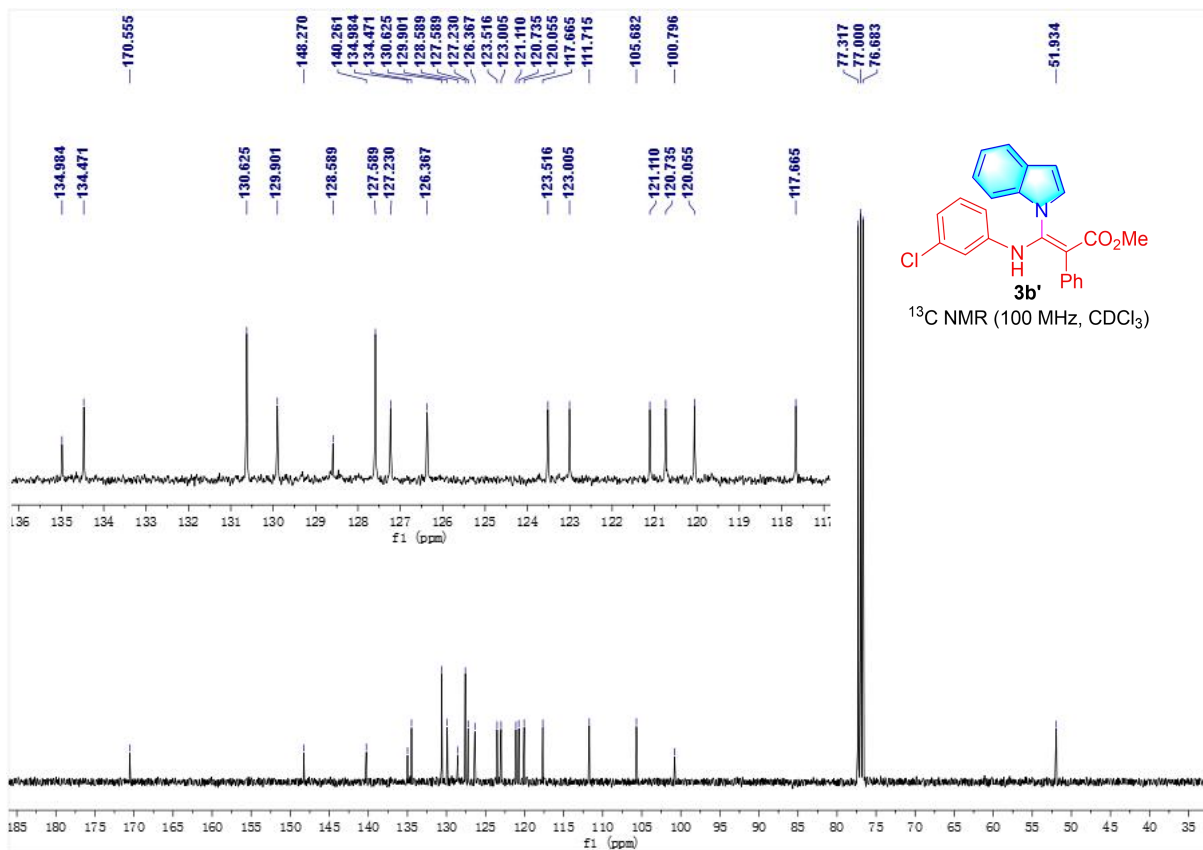

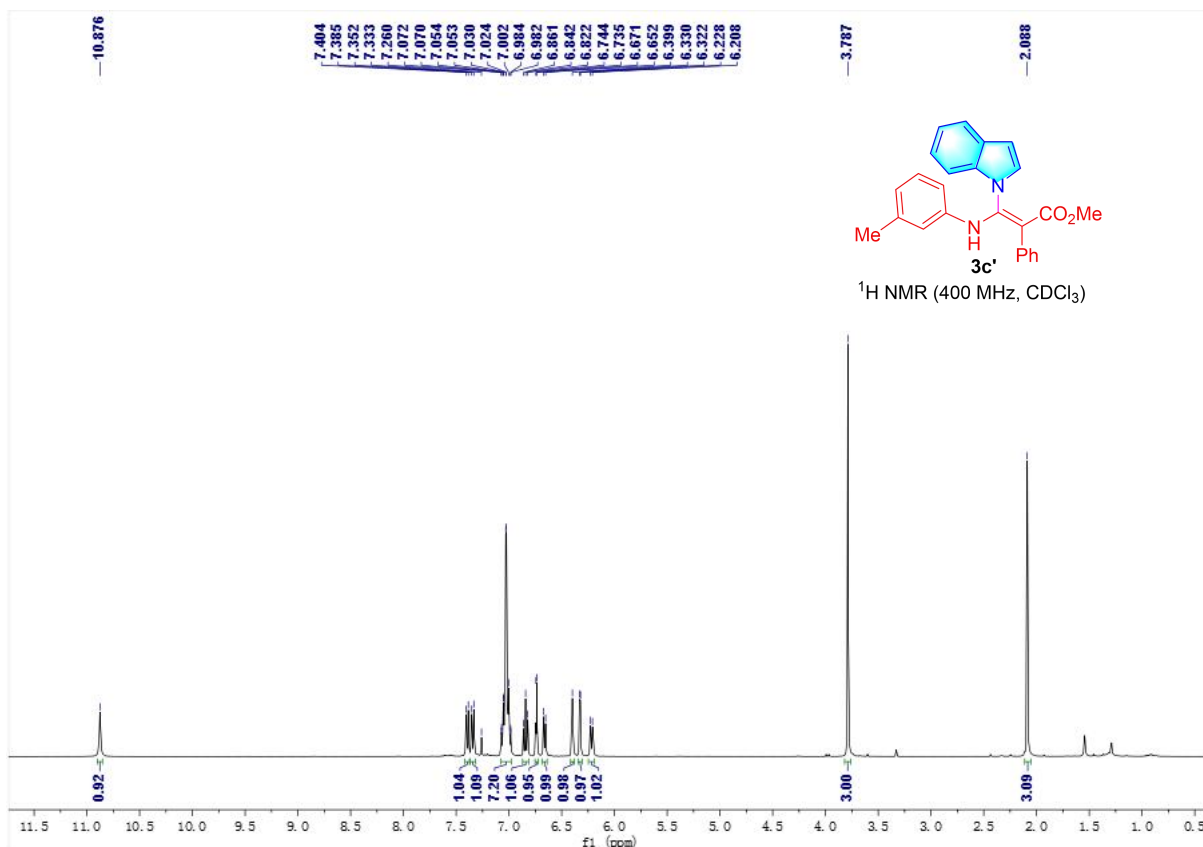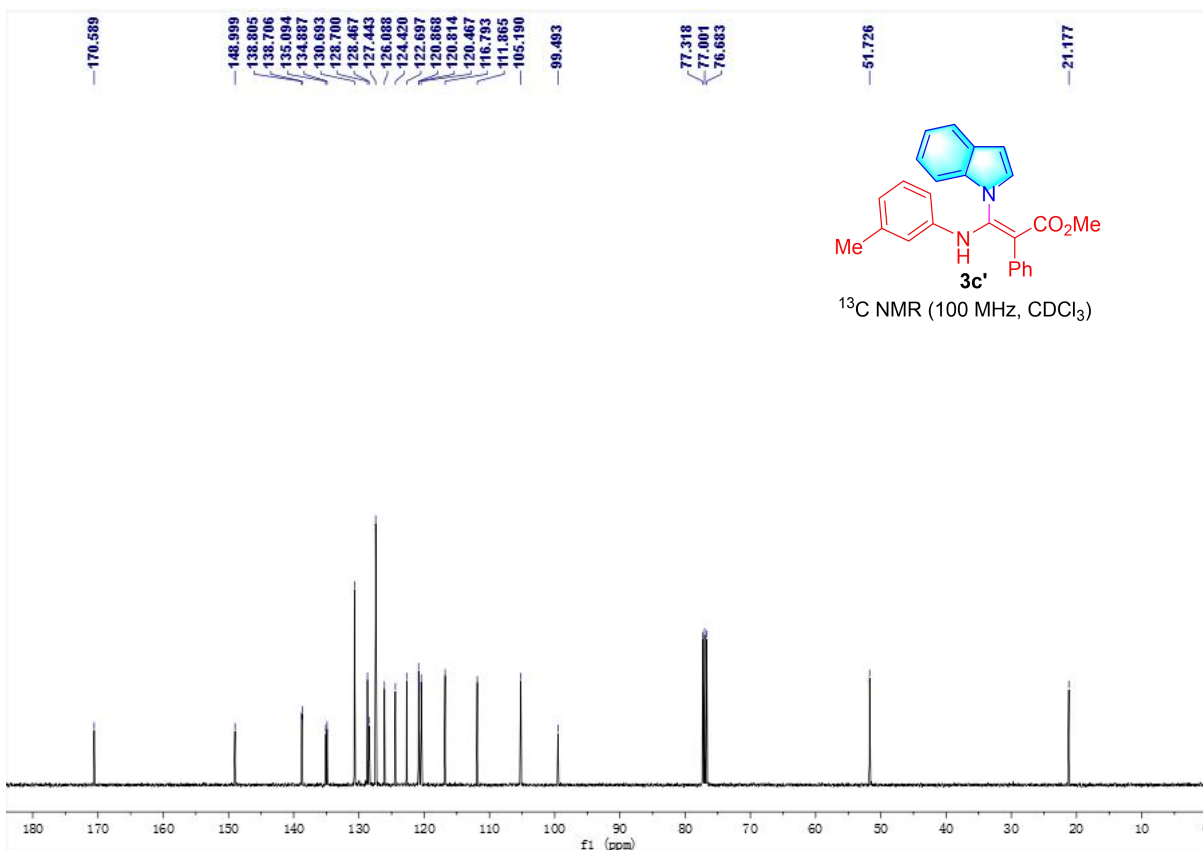

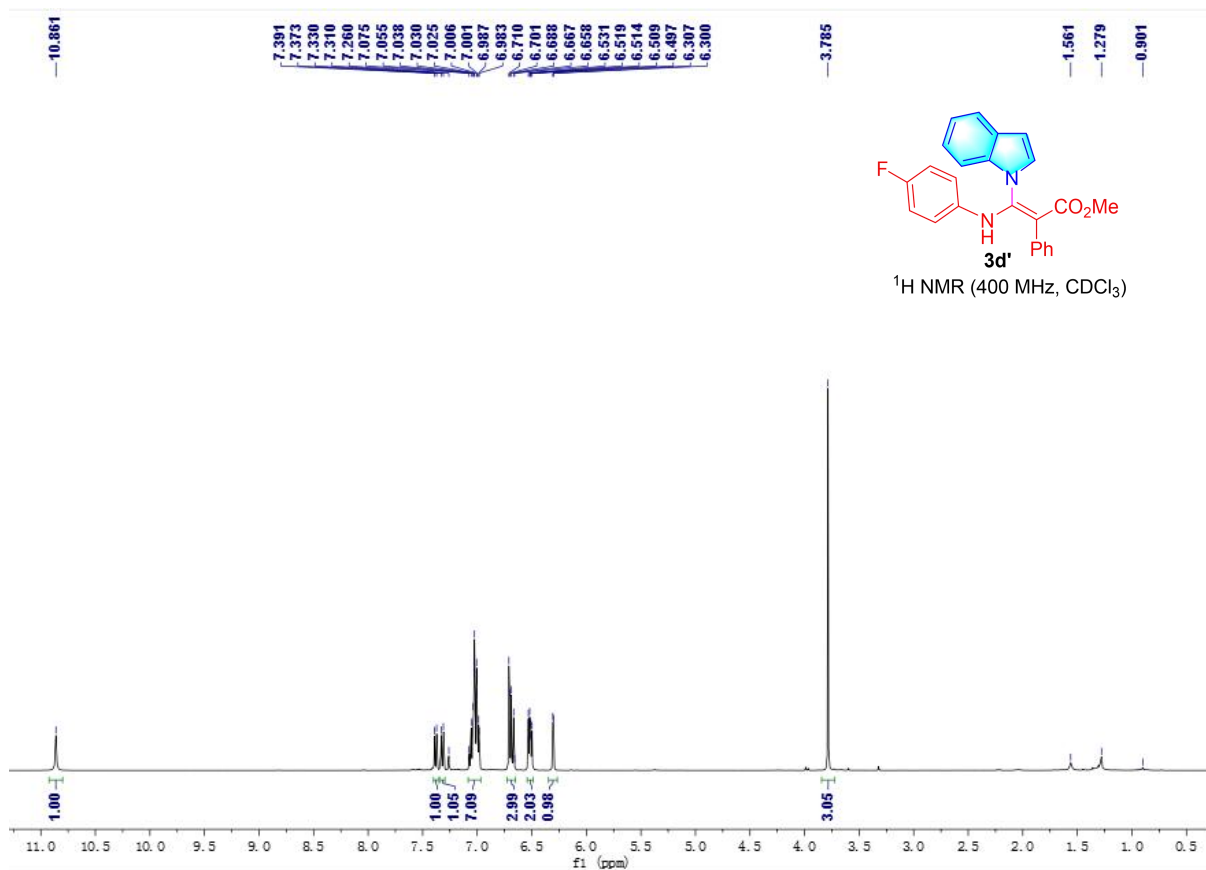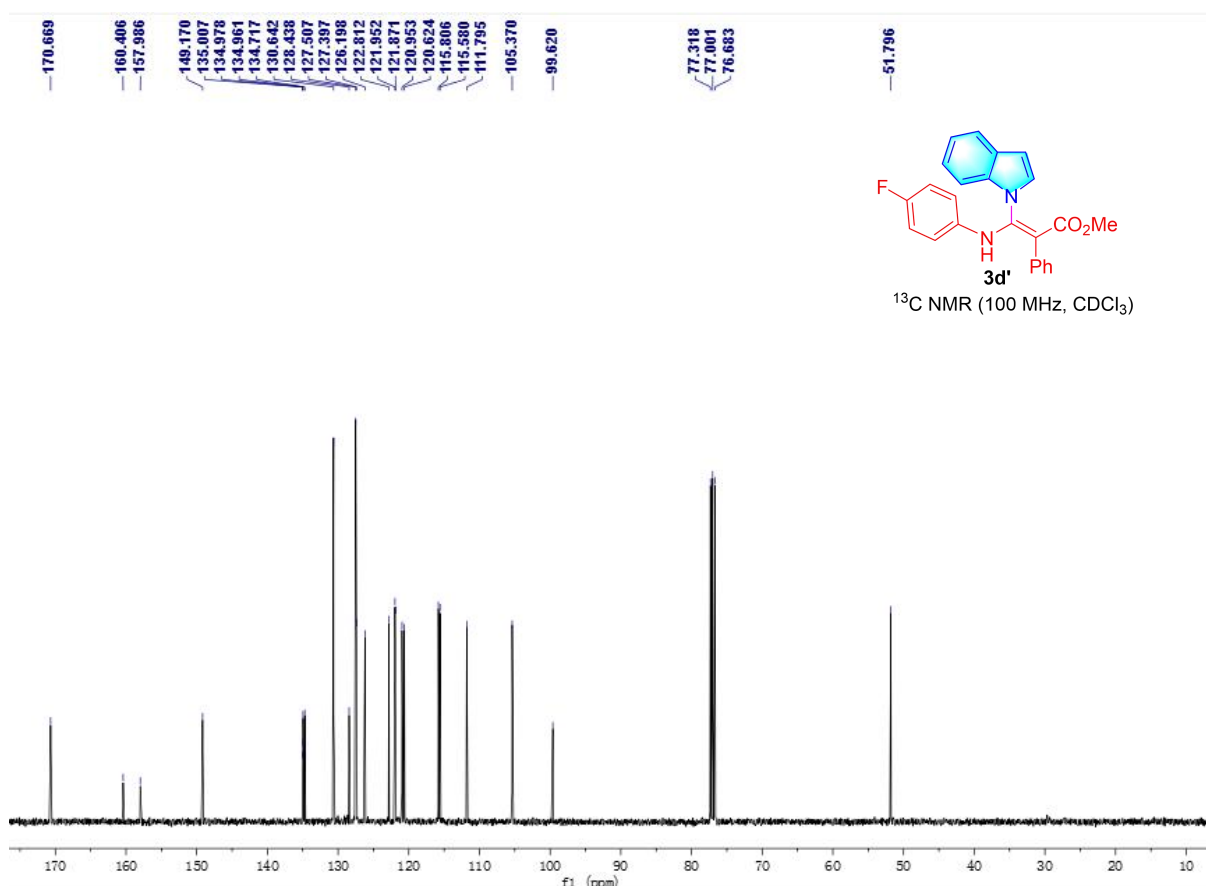

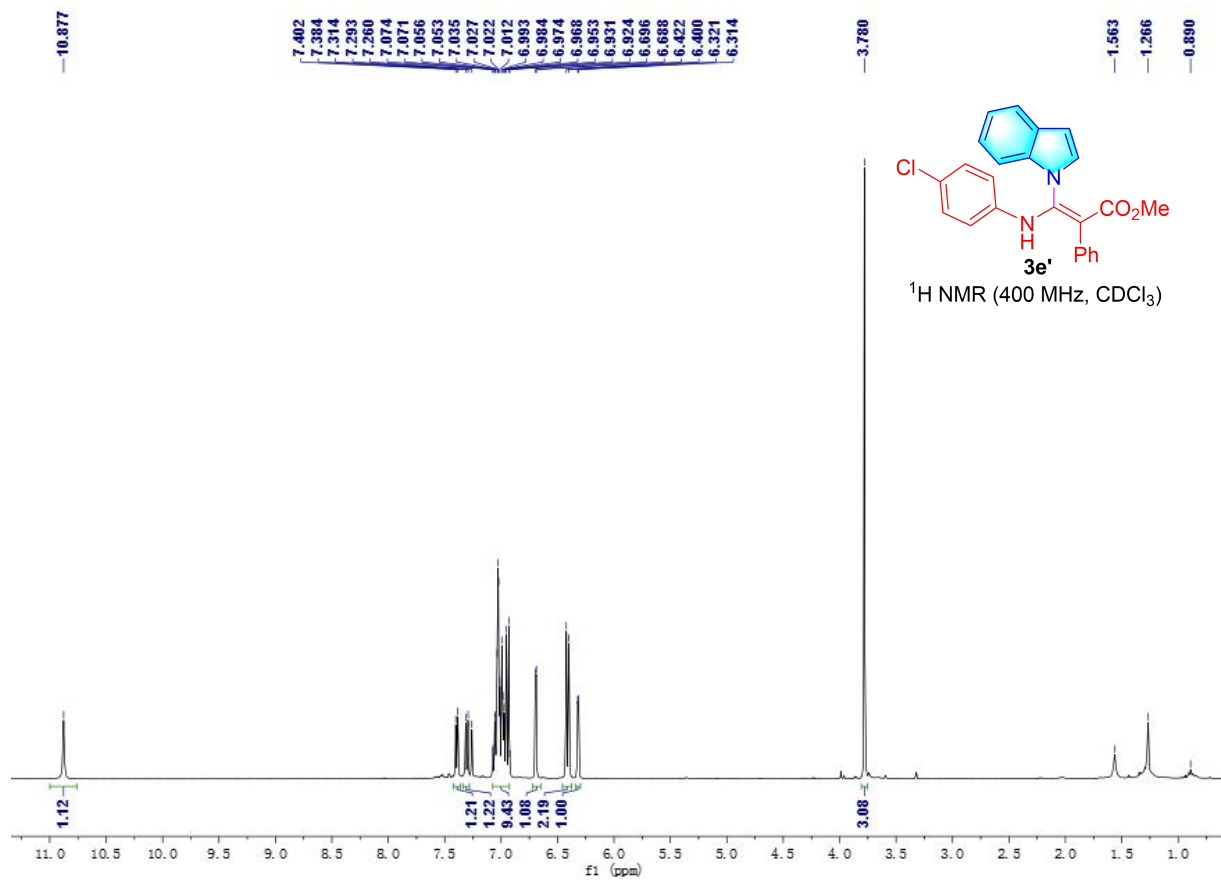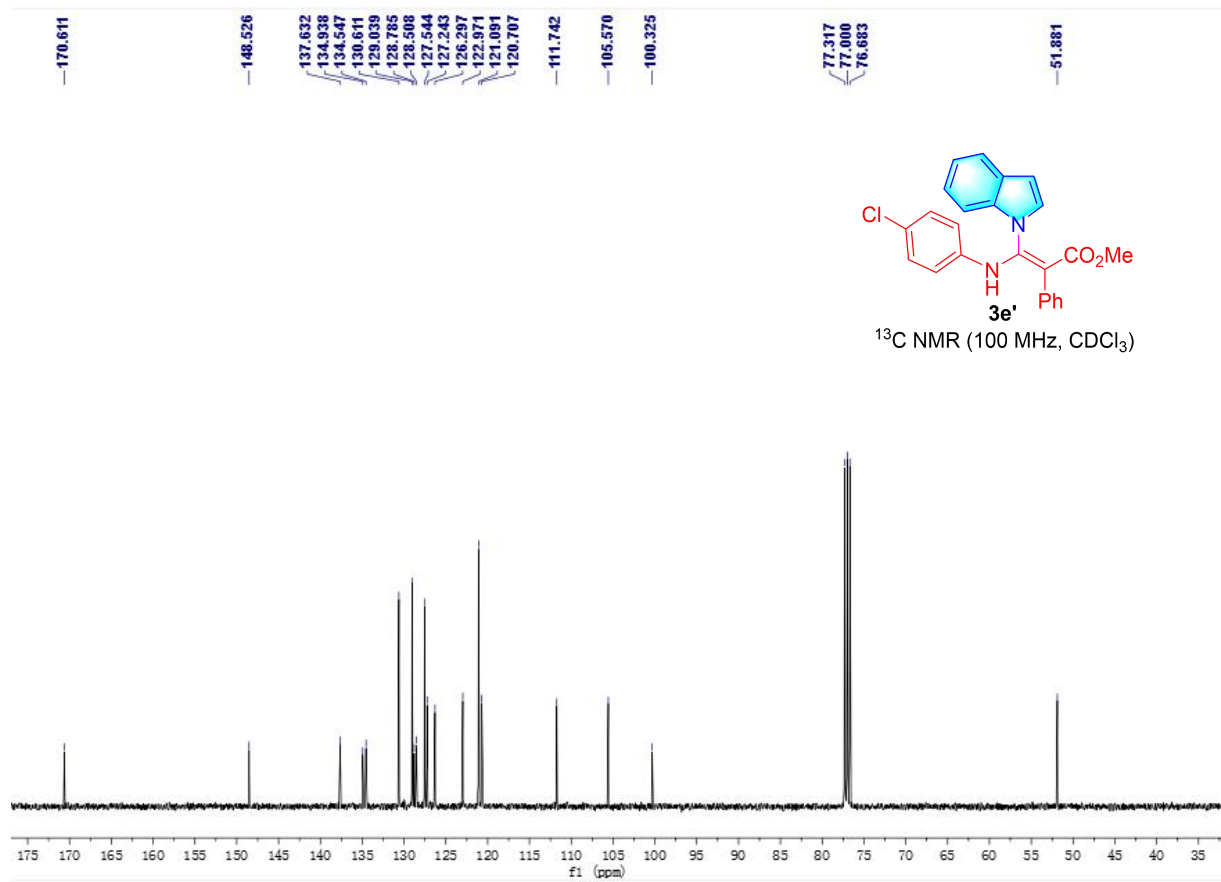

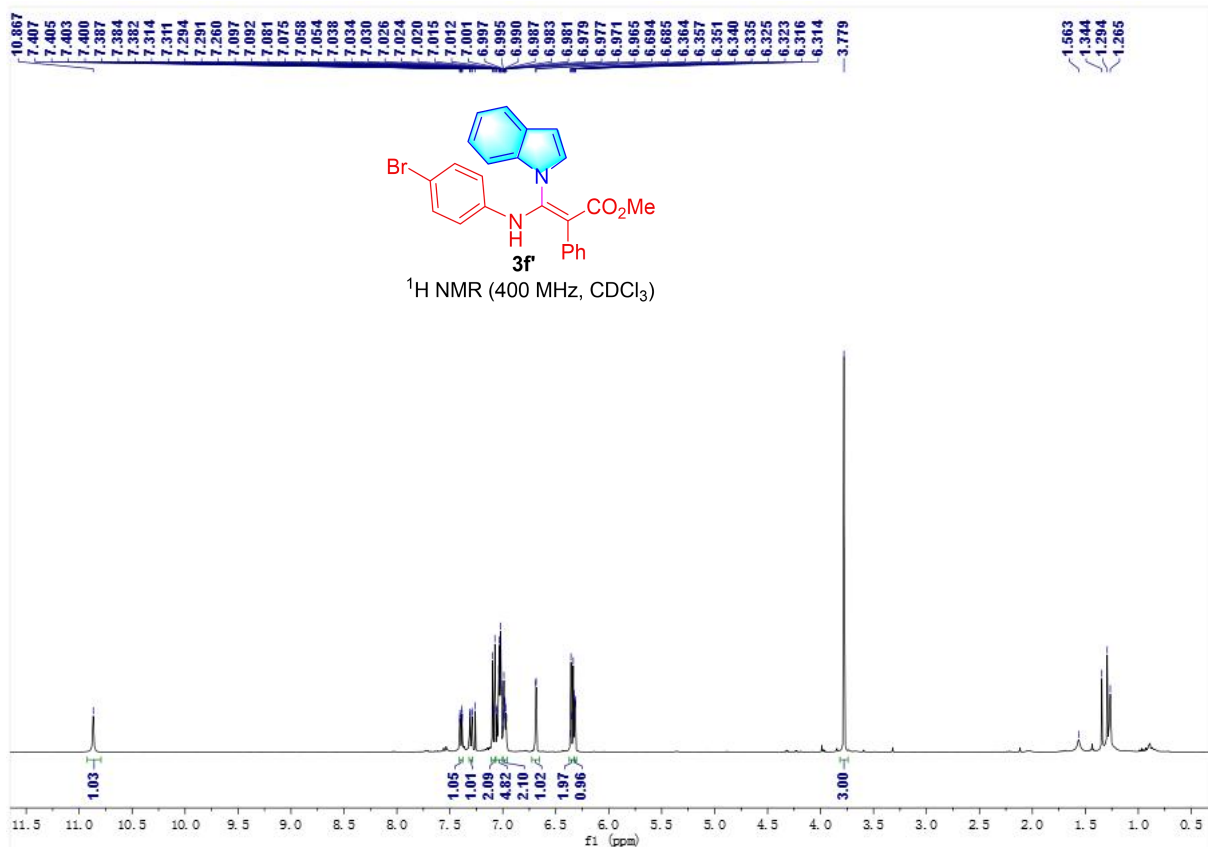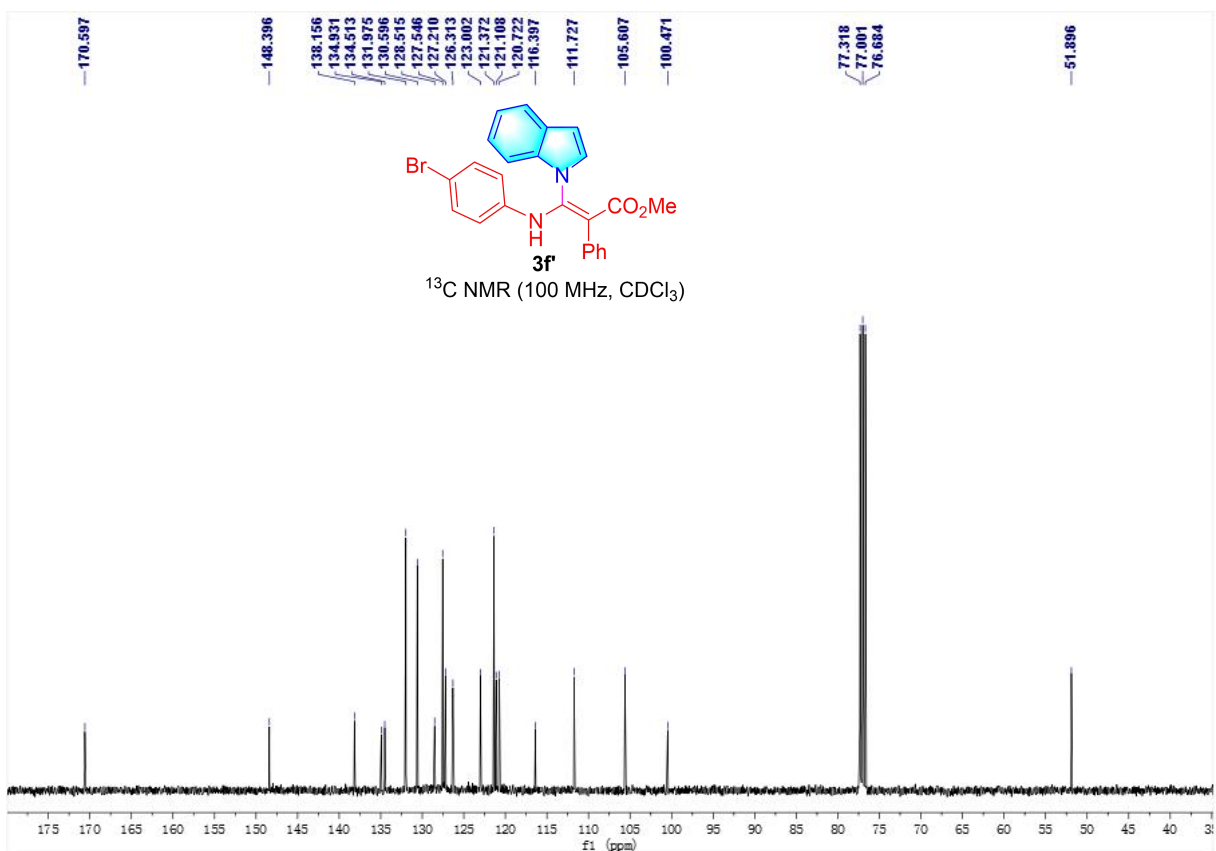

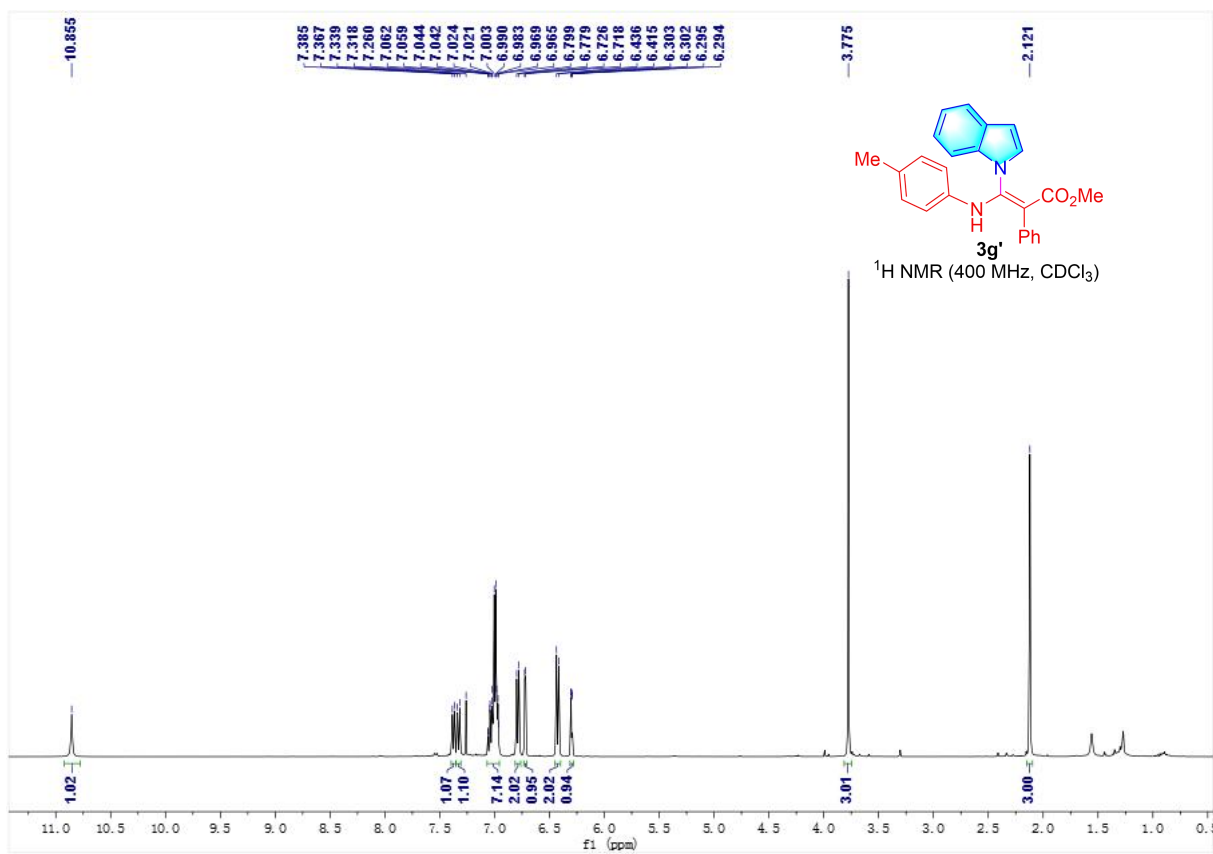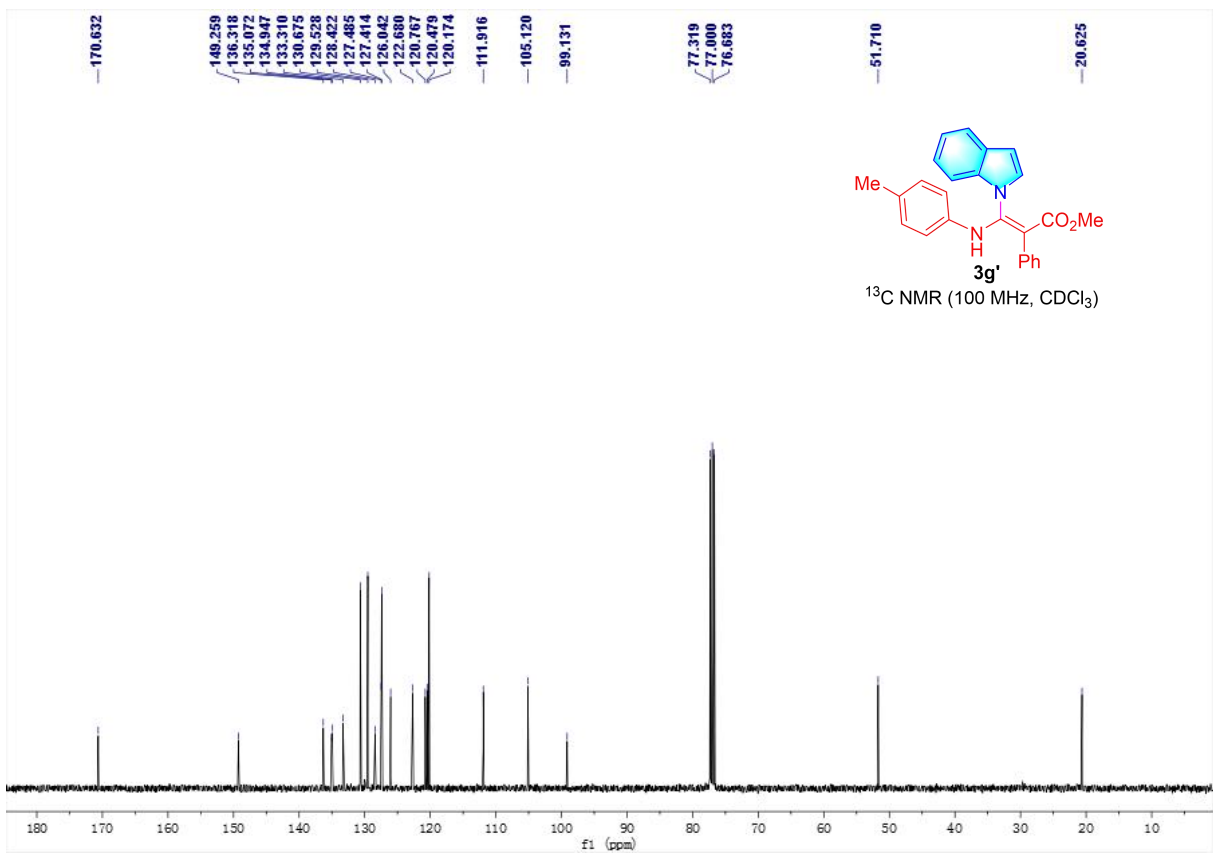

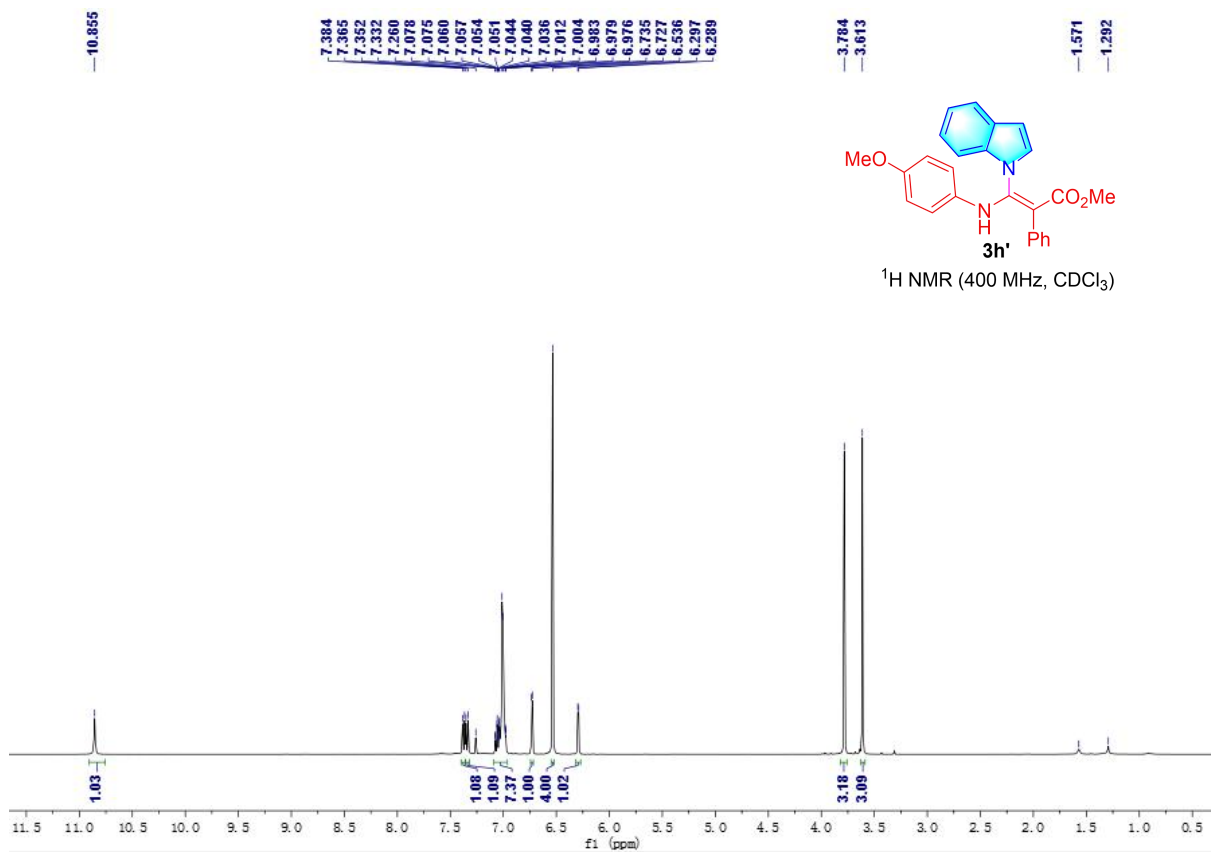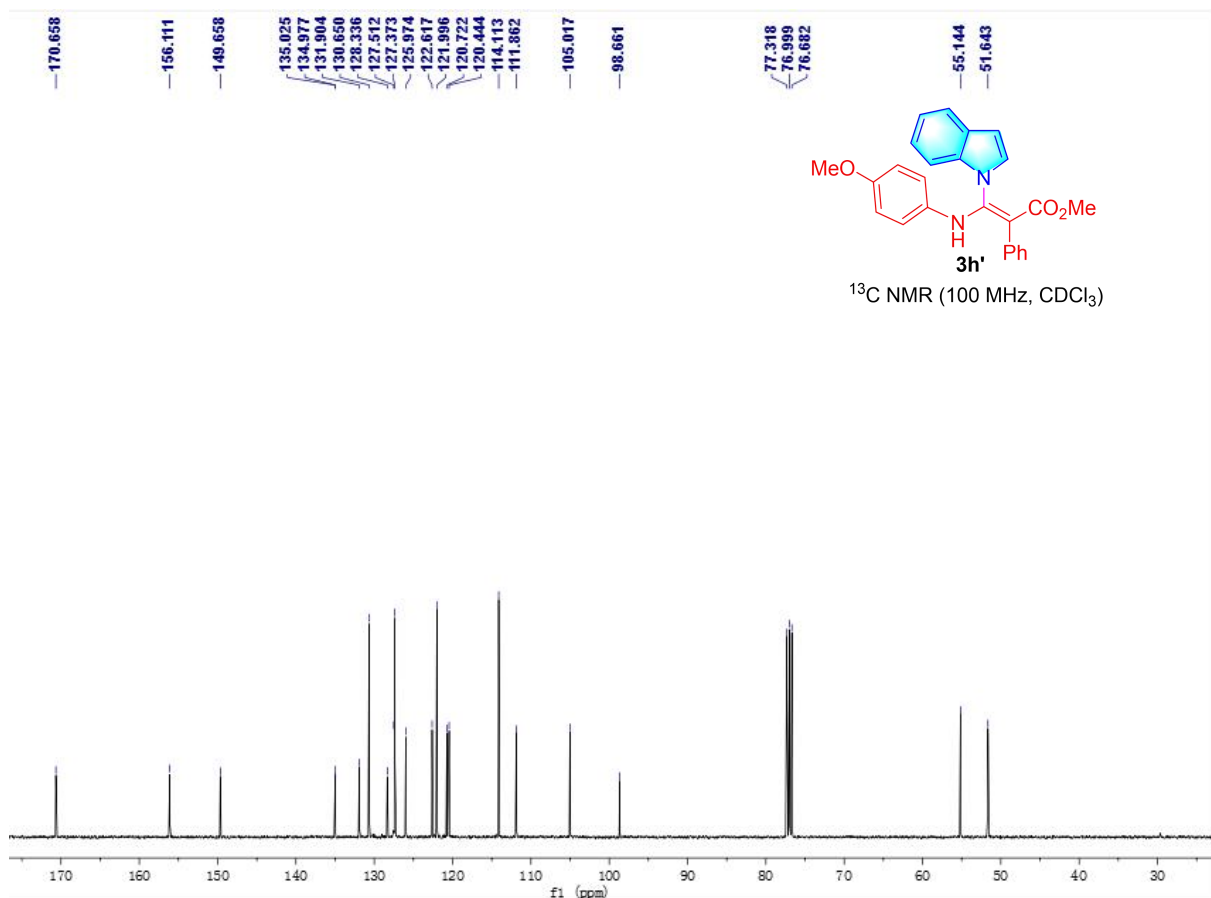

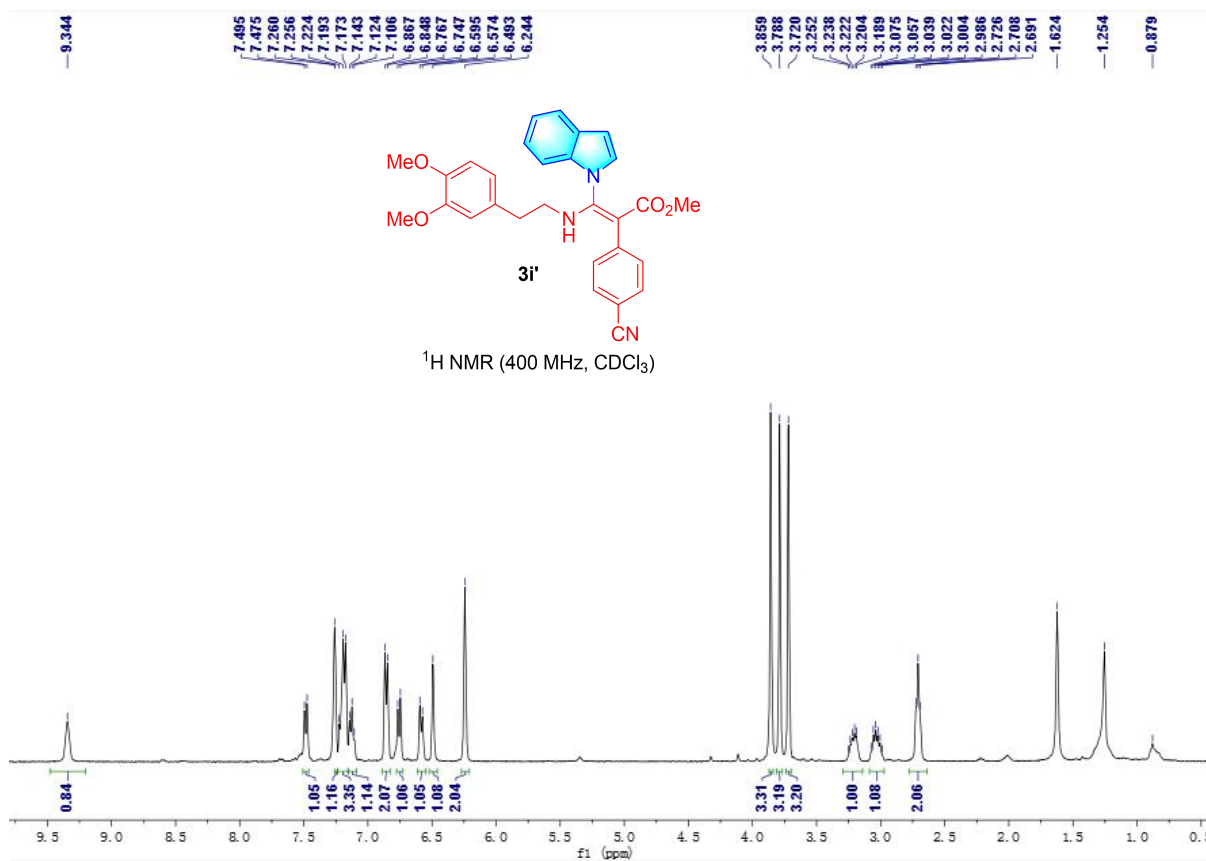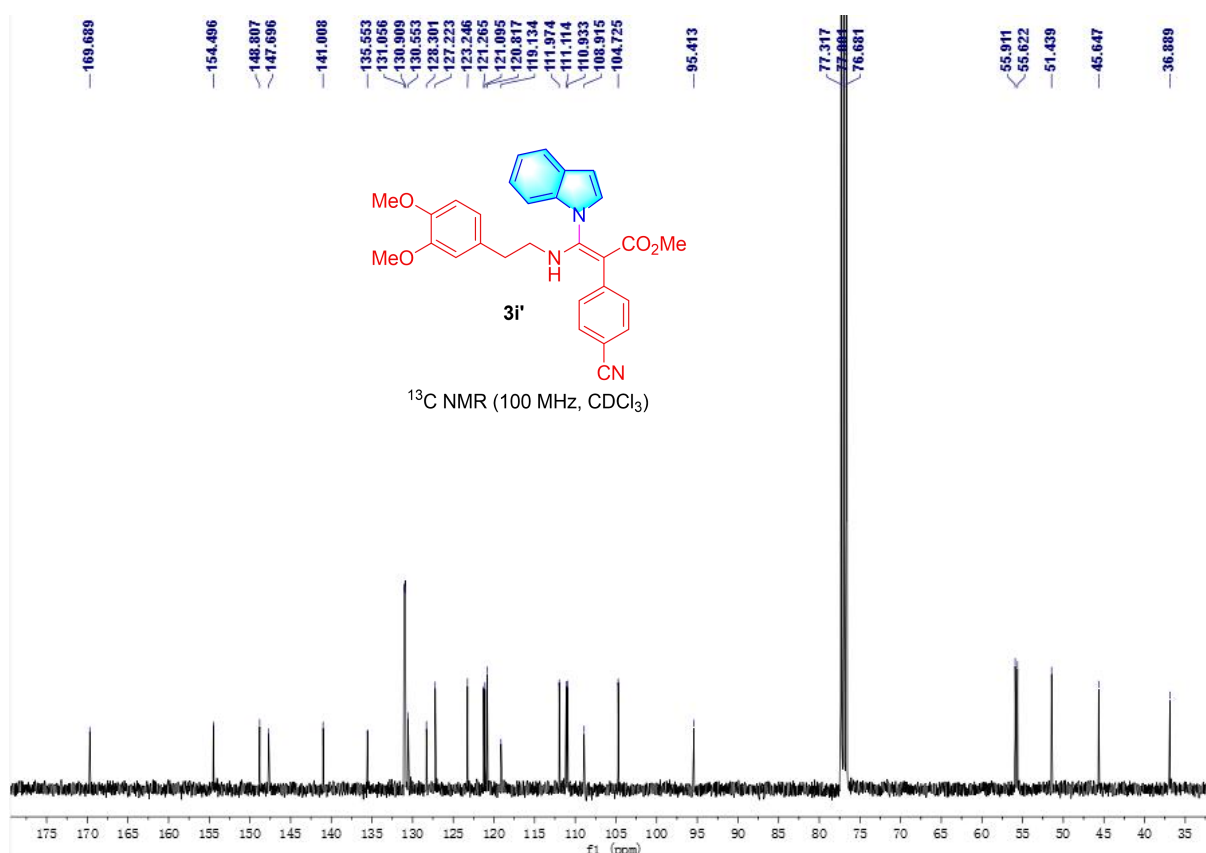



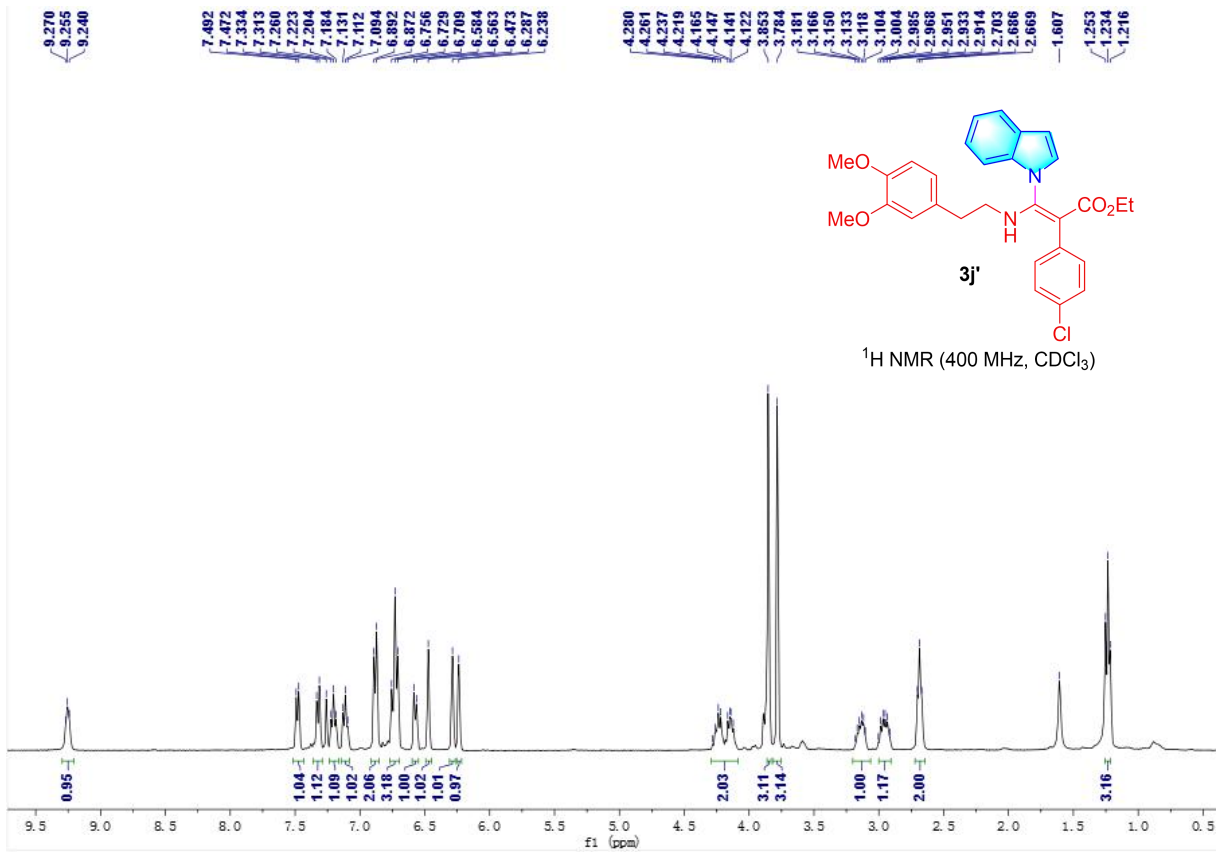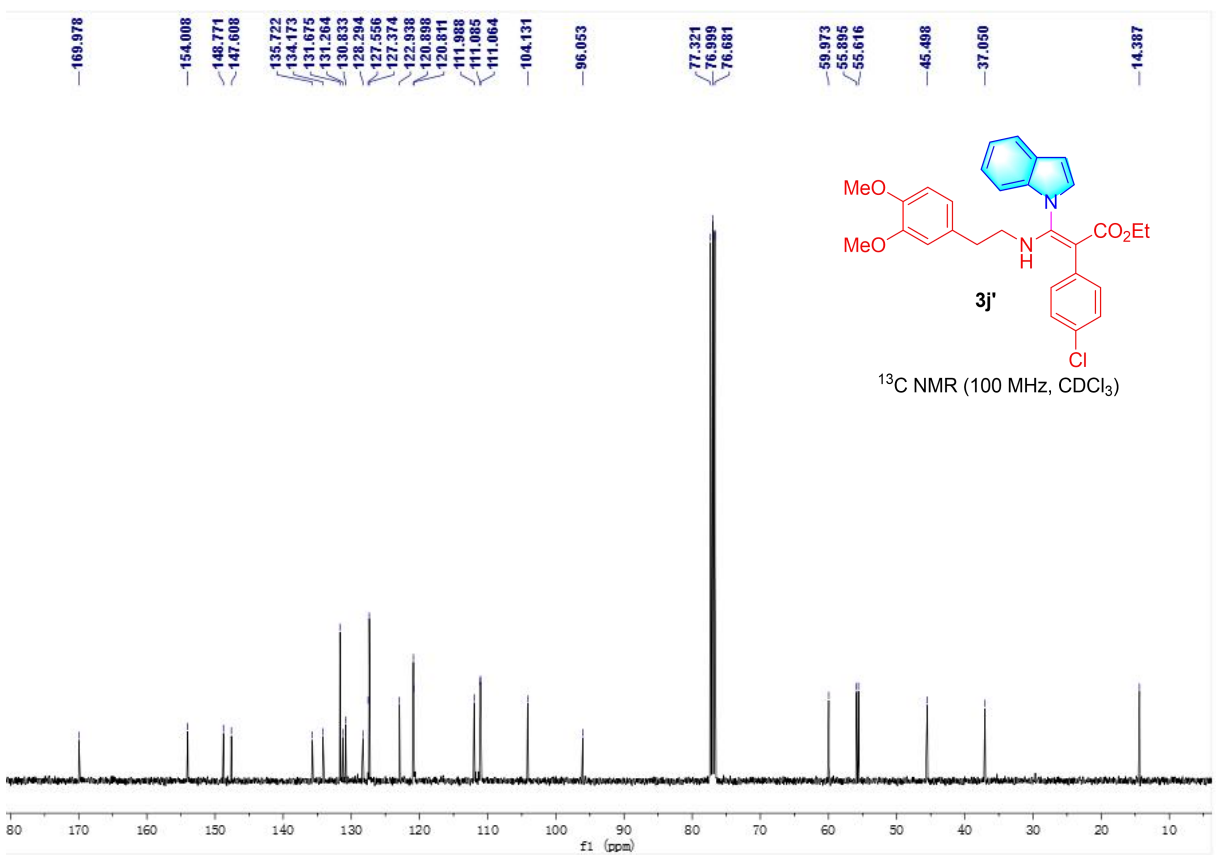

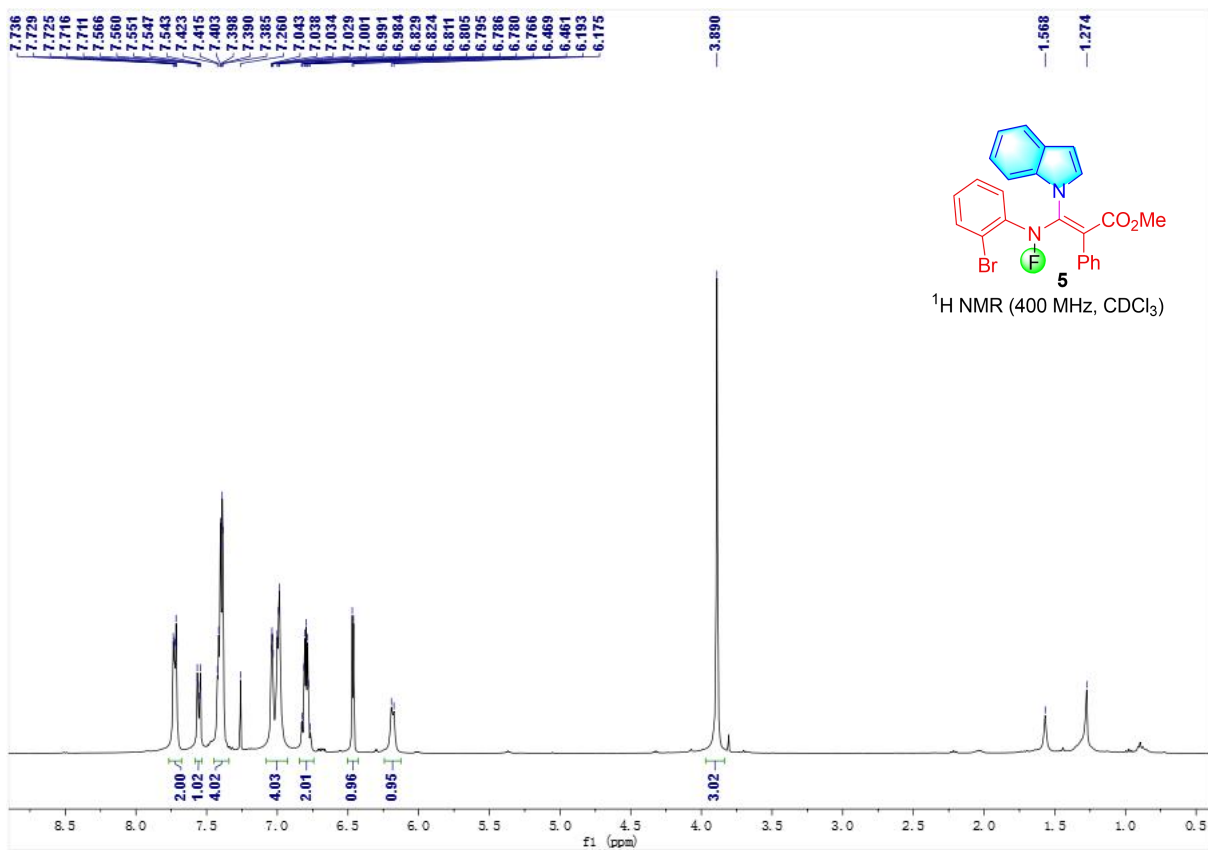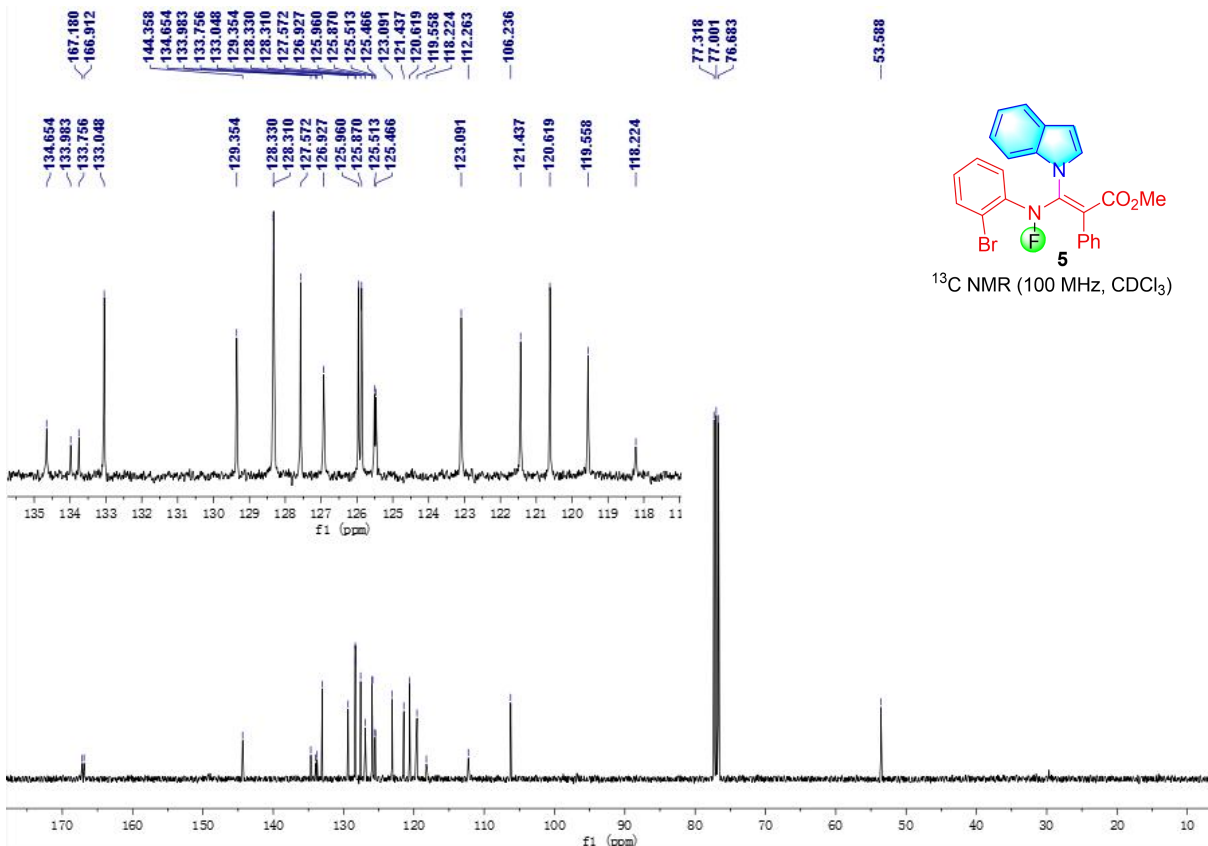

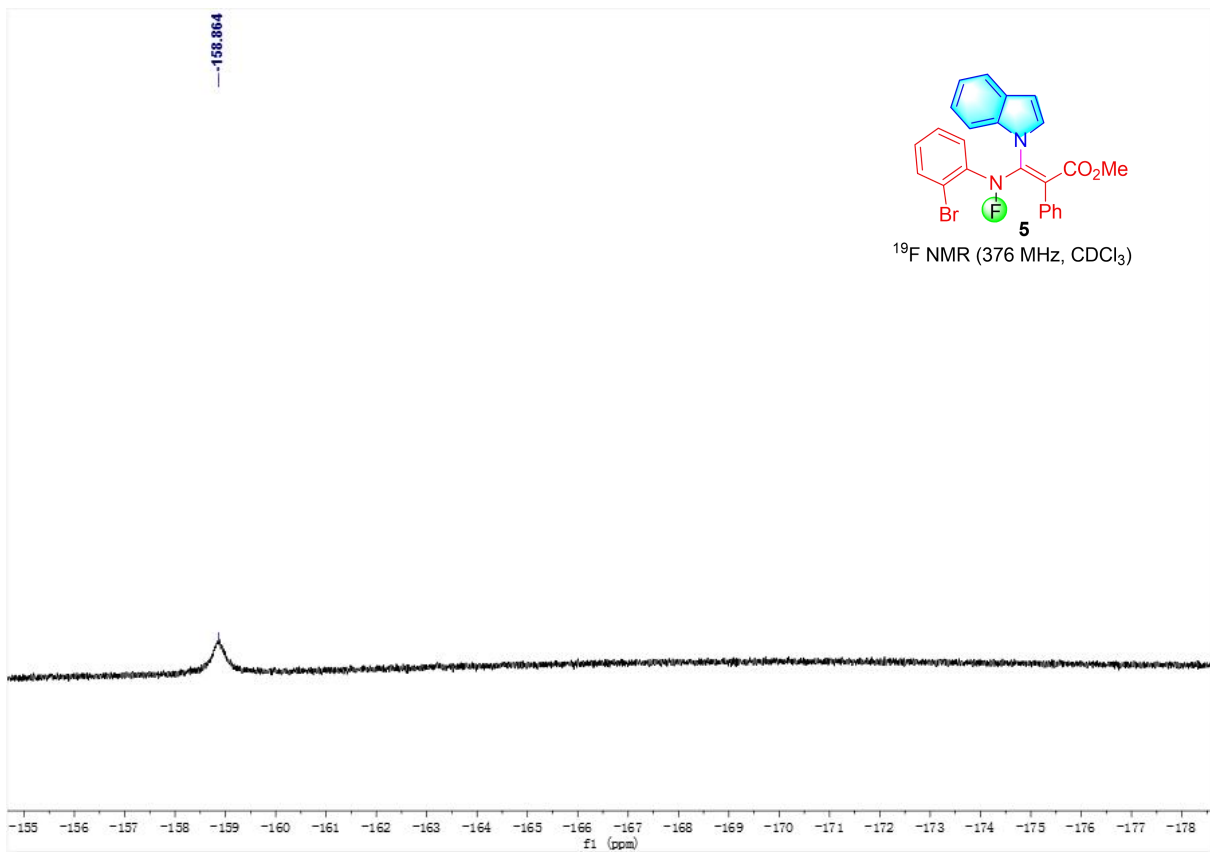

Supplement: d3qo00635b1.pdf [file d3qo00635b1.pdf]
